# Supplementary material
Source: publisher figshare collection journal article supplement (https://acs.figshare.com/ndownloader/files/5698974)
Supplement: Supplementary file 1 [file 5698974]

# ic026029g.cif

#=========================================================================

# 2. TITLE AND AUTHOR LIST


  _publ_section_title

  ;

  Examination of Novel Zinc-Binding Groups for Use in Matrix
Metalloproteinase Inhibitors�

  ;


  loop

  _publ_author_name

  _publ_author_address

       'Cohen Seth M.'

;      Department of Chemistry and Biochemistry

        University of California, San Diego

        La Jolla

        CA 92093-0358

        USA

;

       'Puerta, David T.'

;      Department of Chemistry and Biochemistry

        University of California, San Diego

        La Jolla

        CA 92093-0358

        USA

;

#=========================================================================


data_[Zn(hydrotris(5,3-Methylphenylpyrazolyl)borate)(2,3-dihydroxypyridine)]


_audit_creation_method            SHELXL-97

_chemical_name_systematic

;

  ?

;

_chemical_name_common             TpZn(2,3-dihydroxypyridine)

_chemical_melting_point           ?

_chemical_formula_moiety          ?

_chemical_formula_sum

  'C35 H32 B N7 O2 Zn'

_chemical_formula_weight          658.86


loop_

  _atom_type_symbol

  _atom_type_description

  _atom_type_scat_dispersion_real

  _atom_type_scat_dispersion_imag

  _atom_type_scat_source

  'C'  'C'   0.0033   0.0016

  'International Tables Vol C Tables 4.2.6.8 and 6.1.1.4'

  'H'  'H'   0.0000   0.0000

  'International Tables Vol C Tables 4.2.6.8 and 6.1.1.4'

  'B'  'B'   0.0013   0.0007

  'International Tables Vol C Tables 4.2.6.8 and 6.1.1.4'

  'N'  'N'   0.0061   0.0033

  'International Tables Vol C Tables 4.2.6.8 and 6.1.1.4'

  'O'  'O'   0.0106   0.0060

  'International Tables Vol C Tables 4.2.6.8 and 6.1.1.4'

  'Zn'  'Zn'   0.2839   1.4301

  'International Tables Vol C Tables 4.2.6.8 and 6.1.1.4'


_symmetry_cell_setting            Triclinic

_symmetry_space_group_name_H-M    P-1


loop_

  _symmetry_equiv_pos_as_xyz

  'x, y, z'

  '-x, -y, -z'


_cell_length_a                    11.0865(10)

_cell_length_b                    12.2292(11)

_cell_length_c                    15.4690(14)

_cell_angle_alpha                 111.3000(10)

_cell_angle_beta                  96.615(2)

_cell_angle_gamma                 102.364(2)

_cell_volume                      1865.3(3)

_cell_formula_units_Z             2


_cell_measurement_temperature     293(2)

_cell_measurement_reflns_used     5765

_cell_measurement_theta_min       2.51

_cell_measurement_theta_max       27.33


_exptl_crystal_description        rhombic

_exptl_crystal_colour             colorless

_exptl_crystal_size_max           0.35

_exptl_crystal_size_mid           0.20

_exptl_crystal_size_min           0.06

_exptl_crystal_density_meas       0

_exptl_crystal_density_diffrn     1.173

_exptl_crystal_density_method     'not measured'

_exptl_crystal_F_000              684

_exptl_absorpt_coefficient_mu     0.696

_exptl_absorpt_correction_type    none

_exptl_absorpt_correction_T_min   ?

_exptl_absorpt_correction_T_max   ?

_exptl_absorpt_process_details    ?


_exptl_special_details

;

  ?

;


_diffrn_ambient_temperature       293(2)

_diffrn_radiation_wavelength      0.71073

_diffrn_radiation_type            MoK\a

_diffrn_radiation_source          'fine-focus sealed tube'

_diffrn_radiation_monochromator   graphite

_diffrn_measurement_device_type   'CCD area detector'

_diffrn_measurement_method        'phi and omega scans'

_diffrn_detector_area_resol_mean  ?

_diffrn_standards_number          ?

_diffrn_standards_interval_count  ?

_diffrn_standards_interval_time   ?

_diffrn_standards_decay_%         ?

_diffrn_reflns_number             10782

_diffrn_reflns_av_R_equivalents   0.0150

_diffrn_reflns_av_sigmaI/netI     0.0390

_diffrn_reflns_limit_h_min        -14

_diffrn_reflns_limit_h_max        13

_diffrn_reflns_limit_k_min        -15

_diffrn_reflns_limit_k_max        13

_diffrn_reflns_limit_l_min        -19

_diffrn_reflns_limit_l_max        20

_diffrn_reflns_theta_min          1.45

_diffrn_reflns_theta_max          27.51

_reflns_number_total              7642

_reflns_number_gt                 6599

_reflns_threshold_expression      >2sigma(I)


_computing_data_collection        'Bruker SMART'

_computing_cell_refinement        'Bruker SMART'

_computing_data_reduction         'Bruker SAINT'

_computing_structure_solution     'SHELXS-97 (Sheldrick, 1990)'

_computing_structure_refinement   'SHELXL-97 (Sheldrick, 1997)'

_computing_molecular_graphics     'Bruker SHELXTL'

_computing_publication_material   'Bruker SHELXTL'


_refine_special_details

;

  Refinement of F^2^ against ALL reflections.  The weighted R-factor wR and

  goodness of fit S are based on F^2^, conventional R-factors R are based

  on F, with F set to zero for negative F^2^. The threshold expression of

  F^2^ > 2sigma(F^2^) is used only for calculating R-factors(gt) etc. and is

  not relevant to the choice of reflections for refinement.  R-factors based

  on F^2^ are statistically about twice as large as those based on F, and R-

  factors based on ALL data will be even larger.

;


_refine_ls_structure_factor_coef  Fsqd

_refine_ls_matrix_type            full

_refine_ls_weighting_scheme       calc

_refine_ls_weighting_details

  'calc w=1/[\s^2^(Fo^2^)+(0.1201P)^2^+2.1198P] where P=(Fo^2^+2Fc^2^)/3'

_atom_sites_solution_primary      direct

_atom_sites_solution_secondary    difmap

_atom_sites_solution_hydrogens    geom

_refine_ls_hydrogen_treatment     mixed

_refine_ls_extinction_method      none

_refine_ls_extinction_coef        ?

_refine_ls_number_reflns          7642

_refine_ls_number_parameters      516

_refine_ls_number_restraints      0

_refine_ls_R_factor_all           0.0690

_refine_ls_R_factor_gt            0.0603

_refine_ls_wR_factor_ref          0.1933

_refine_ls_wR_factor_gt           0.1833

_refine_ls_goodness_of_fit_ref    1.075

_refine_ls_restrained_S_all       1.075

_refine_ls_shift/su_max           0.016

_refine_ls_shift/su_mean          0.002


loop_

  _atom_site_label

  _atom_site_type_symbol

  _atom_site_fract_x

  _atom_site_fract_y

  _atom_site_fract_z

  _atom_site_U_iso_or_equiv

  _atom_site_adp_type

  _atom_site_occupancy

  _atom_site_symmetry_multiplicity

  _atom_site_calc_flag

  _atom_site_refinement_flags

  _atom_site_disorder_assembly

  _atom_site_disorder_group

H36 H 0.590(4) 1.049(3) 1.060(3) 0.028(9) Uiso 1 1 d . . .

H35 H 0.318(4) 0.691(4) 0.500(3) 0.031(10) Uiso 1 1 d . . .

C17 C 0.5359(13) 1.4103(6) 0.8283(6) 0.129(5) Uani 1 1 d . . .

H17 H 0.4987 1.4737 0.8368 0.155 Uiso 1 1 calc R . .

C18 C 0.6406(14) 1.4311(6) 0.8816(6) 0.146(6) Uani 1 1 d . . .

H18 H 0.6759 1.5074 0.9311 0.175 Uiso 1 1 calc R . .

Zn1 Zn 0.59317(3) 0.91580(3) 0.74314(2) 0.02510(15) Uani 1 1 d . . .

O2 O 0.5512(2) 0.98793(19) 0.88781(15) 0.0230(4) Uani 1 1 d . . .

O1 O 0.7617(2) 0.9984(2) 0.81700(17) 0.0385(6) Uani 1 1 d . . .

N6 N 0.6374(3) 0.8138(3) 0.60120(19) 0.0332(7) Uani 1 1 d . . .

N2 N 0.4706(3) 0.7536(2) 0.72130(17) 0.0249(5) Uani 1 1 d . . .

N4 N 0.4774(3) 0.9744(3) 0.6686(2) 0.0349(7) Uani 1 1 d . . .

N1 N 0.3740(3) 0.7109(2) 0.6436(2) 0.0320(6) Uani 1 1 d . . .

N7 N 0.6673(3) 1.0620(2) 1.03976(18) 0.0254(6) Uani 1 1 d . . .

C5 C 0.5227(3) 0.7222(3) 0.8656(2) 0.0272(7) Uani 1 1 d . . .

N3 N 0.4025(3) 0.8837(3) 0.5860(2) 0.0364(7) Uani 1 1 d . . .

N5 N 0.5282(3) 0.7315(3) 0.54046(19) 0.0357(7) Uani 1 1 d . . .

C35 C 0.6580(3) 1.0286(3) 0.9449(2) 0.0239(6) Uani 1 1 d . . .

C24 C 0.7333(4) 0.7818(3) 0.5614(3) 0.0382(9) Uani 1 1 d . . .

C4 C 0.4336(3) 0.6989(3) 0.7780(2) 0.0258(6) Uani 1 1 d . . .

C6 C 0.6510(3) 0.7419(3) 0.8664(2) 0.0303(7) Uani 1 1 d . . .

H6 H 0.6794 0.7368 0.8112 0.036 Uiso 1 1 calc R . .

C3 C 0.3120(4) 0.6217(3) 0.7384(3) 0.0402(9) Uani 1 1 d . . .

H3 H 0.2640 0.5738 0.7639 0.048 Uiso 1 1 calc R . .

C31 C 0.7738(3) 1.0380(3) 0.9099(2) 0.0333(8) Uani 1 1 d . . .

C10 C 0.4811(4) 0.7272(3) 0.9478(3) 0.0389(9) Uani 1 1 d . . .

H10 H 0.3953 0.7119 0.9480 0.047 Uiso 1 1 calc R . .

C23 C 0.6847(5) 0.6786(3) 0.4758(3) 0.0460(10) Uani 1 1 d . . .

H23 H 0.7307 0.6384 0.4345 0.055 Uiso 1 1 calc R . .

C12 C 0.3487(4) 0.9333(4) 0.5319(3) 0.0450(10) Uani 1 1 d . . .

C34 C 0.7809(3) 1.1056(3) 1.1036(2) 0.0343(8) Uani 1 1 d . . .

H34 H 0.7828 1.1265 1.1680 0.041 Uiso 1 1 calc R . .

C7 C 0.7377(4) 0.7692(3) 0.9491(3) 0.0419(9) Uani 1 1 d . . .

H7 H 0.8235 0.7824 0.9491 0.050 Uiso 1 1 calc R . .

C22 C 0.5555(5) 0.6486(3) 0.4651(2) 0.0416(10) Uani 1 1 d . . .

C2 C 0.2772(4) 0.6309(3) 0.6530(3) 0.0442(10) Uani 1 1 d . . .

C14 C 0.4665(4) 1.0804(4) 0.6647(3) 0.0417(9) Uani 1 1 d . . .

C32 C 0.8865(4) 1.0844(4) 0.9747(3) 0.0456(10) Uani 1 1 d . . .

H32 H 0.9620 1.0939 0.9539 0.055 Uiso 1 1 calc R . .

C25 C 0.8652(5) 0.8532(4) 0.6034(3) 0.0480(11) Uani 1 1 d . . .

C33 C 0.8894(4) 1.1179(4) 1.0723(3) 0.0452(10) Uani 1 1 d . . .

H33 H 0.9665 1.1487 1.1154 0.054 Uiso 1 1 calc R . .

C21 C 0.4557(5) 0.5447(4) 0.3892(3) 0.0476(11) Uani 1 1 d . . .

H21A H 0.4060 0.4979 0.4173 0.071 Uiso 1 1 calc R . .

H21B H 0.4948 0.4935 0.3449 0.071 Uiso 1 1 calc R . .

H21C H 0.4022 0.5759 0.3565 0.071 Uiso 1 1 calc R . .

C13 C 0.3877(5) 1.0572(4) 0.5801(3) 0.0487(11) Uani 1 1 d . . .

H13 H 0.3657 1.1147 0.5600 0.058 Uiso 1 1 calc R . .

C15 C 0.5336(6) 1.2006(4) 0.7420(3) 0.0572(14) Uani 1 1 d . . .

C11 C 0.2641(5) 0.8595(5) 0.4380(3) 0.0606(14) Uani 1 1 d . . .

H11A H 0.3047 0.8043 0.3989 0.091 Uiso 1 1 calc R . .

H11B H 0.2455 0.9125 0.4084 0.091 Uiso 1 1 calc R . .

H11C H 0.1870 0.8138 0.4455 0.091 Uiso 1 1 calc R . .

B1 B 0.3987(5) 0.7478(4) 0.5601(3) 0.0384(10) Uani 1 1 d . . .

C8 C 0.6956(5) 0.7765(4) 1.0313(3) 0.0538(13) Uani 1 1 d . . .

H8 H 0.7532 0.7958 1.0869 0.065 Uiso 1 1 calc R . .

C9 C 0.5697(6) 0.7555(4) 1.0307(3) 0.0522(12) Uani 1 1 d . . .

H9 H 0.5421 0.7600 1.0861 0.063 Uiso 1 1 calc R . .

C20 C 0.6504(6) 1.2243(4) 0.7981(4) 0.0660(15) Uani 1 1 d . . .

H20 H 0.6918 1.1637 0.7898 0.079 Uiso 1 1 calc R . .

C1 C 0.1576(5) 0.5661(5) 0.5771(5) 0.089(2) Uani 1 1 d . . .

H1A H 0.1221 0.6253 0.5647 0.133 Uiso 1 1 calc R . .

H1B H 0.0980 0.5177 0.5984 0.133 Uiso 1 1 calc R . .

H1C H 0.1768 0.5142 0.5200 0.133 Uiso 1 1 calc R . .

C16 C 0.4737(8) 1.2951(5) 0.7566(4) 0.089(2) Uani 1 1 d . . .

H16 H 0.3952 1.2811 0.7196 0.107 Uiso 1 1 calc R . .

C28 C 1.1222(6) 0.9899(5) 0.6812(5) 0.094(3) Uani 1 1 d . . .

C30 C 0.9145(6) 0.9774(6) 0.6736(4) 0.0314(13) Uani 0.55 1 d P . .

C26 C 0.9761(7) 0.7970(7) 0.5929(6) 0.0435(16) Uani 0.55 1 d P . .

C29 C 1.0412(7) 1.0403(7) 0.7125(5) 0.0374(15) Uani 0.55 1 d P . .

C27 C 1.1036(7) 0.8617(7) 0.6324(6) 0.0462(17) Uani 0.55 1 d P . .

C19 C 0.7037(10) 1.3411(5) 0.8672(5) 0.109(3) Uani 1 1 d . . .

H19 H 0.7832 1.3599 0.9047 0.131 Uiso 1 1 calc R . .

C30B C 0.9087(7) 0.8786(8) 0.6845(5) 0.0315(16) Uani 0.45 1 d P . .

C26B C 0.9127(8) 0.8954(8) 0.5340(6) 0.0374(18) Uani 0.45 1 d P . .

C29B C 1.0350(7) 0.9548(9) 0.7192(6) 0.0389(19) Uani 0.45 1 d P . .

C27B C 1.0374(8) 0.9672(10) 0.5684(7) 0.045(2) Uani 0.45 1 d P . .

C39 C 0.1289(13) 0.3671(11) 0.8059(9) 0.073(3) Uani 0.50 1 d P . .

C37 C -0.0379(10) 0.4298(12) 0.7375(13) 0.088(4) Uani 0.50 1 d P . .

C38 C 0.0296(12) 0.3444(12) 0.7275(10) 0.080(4) Uani 0.50 1 d P . .

C40 C 0.1400(18) 0.4553(16) 0.8818(8) 0.103(5) Uani 0.50 1 d P . .

C36 C -0.0166(11) 0.5173(13) 0.8068(11) 0.069(3) Uani 0.50 1 d P . .

C41 C 0.044(3) 0.5401(13) 0.8719(16) 0.149(11) Uani 0.50 1 d P . .


loop_

  _atom_site_aniso_label

  _atom_site_aniso_U_11

  _atom_site_aniso_U_22

  _atom_site_aniso_U_33

  _atom_site_aniso_U_23

  _atom_site_aniso_U_13

  _atom_site_aniso_U_12

C17 0.321(16) 0.050(4) 0.078(5) 0.047(4) 0.119(7) 0.095(7)

C18 0.329(18) 0.021(3) 0.083(5) 0.021(3) 0.084(8) 0.021(5)

Zn1 0.0328(2) 0.0213(2) 0.0209(2) 0.00764(15) 0.00761(14) 0.00714(15)

O2 0.0251(11) 0.0207(10) 0.0213(10) 0.0058(8) 0.0055(8) 0.0067(8)

O1 0.0315(13) 0.0394(14) 0.0286(12) 0.0004(10) 0.0130(10) -0.0021(10)

N6 0.0546(19) 0.0334(15) 0.0195(12) 0.0122(11) 0.0111(12) 0.0233(14)

N2 0.0304(14) 0.0218(12) 0.0174(11) 0.0039(10) 0.0007(10) 0.0066(10)

N4 0.0569(19) 0.0293(15) 0.0266(14) 0.0124(12) 0.0153(13) 0.0225(14)

N1 0.0371(15) 0.0238(13) 0.0262(13) 0.0037(11) -0.0059(11) 0.0081(11)

N7 0.0271(14) 0.0237(13) 0.0210(12) 0.0039(10) 0.0042(10) 0.0077(10)

C5 0.0408(18) 0.0175(14) 0.0228(14) 0.0071(12) 0.0069(13) 0.0084(12)

N3 0.0556(19) 0.0396(16) 0.0219(13) 0.0134(12) 0.0077(12) 0.0276(15)

N5 0.060(2) 0.0348(15) 0.0170(12) 0.0082(11) 0.0049(12) 0.0272(14)

C35 0.0277(15) 0.0175(13) 0.0222(14) 0.0033(11) 0.0075(11) 0.0048(11)

C24 0.072(3) 0.0278(17) 0.0312(17) 0.0183(14) 0.0304(17) 0.0240(17)

C4 0.0331(16) 0.0168(13) 0.0257(15) 0.0057(12) 0.0071(12) 0.0077(12)

C6 0.0394(18) 0.0244(15) 0.0253(15) 0.0102(13) 0.0013(13) 0.0076(13)

C3 0.0356(19) 0.0264(17) 0.056(2) 0.0189(17) 0.0036(16) 0.0030(14)

C31 0.0299(17) 0.0291(16) 0.0286(16) 0.0006(13) 0.0092(13) 0.0017(13)

C10 0.066(3) 0.0247(16) 0.0332(18) 0.0147(14) 0.0224(17) 0.0157(16)

C23 0.083(3) 0.0289(18) 0.041(2) 0.0169(16) 0.041(2) 0.0244(19)

C12 0.065(3) 0.066(3) 0.0299(18) 0.0290(19) 0.0224(17) 0.046(2)

C34 0.0328(18) 0.0349(18) 0.0241(15) 0.0023(13) -0.0012(13) 0.0076(14)

C7 0.053(2) 0.0287(17) 0.0365(19) 0.0099(15) -0.0087(17) 0.0106(16)

C22 0.088(3) 0.0277(17) 0.0214(15) 0.0145(14) 0.0212(17) 0.0273(19)

C2 0.040(2) 0.0231(16) 0.058(2) 0.0138(17) -0.0114(18) 0.0014(15)

C14 0.076(3) 0.038(2) 0.0381(19) 0.0268(17) 0.0367(19) 0.038(2)

C32 0.0273(17) 0.049(2) 0.040(2) -0.0009(17) 0.0089(15) 0.0014(16)

C25 0.069(3) 0.0322(19) 0.053(2) 0.0170(18) 0.044(2) 0.0183(19)

C33 0.0271(18) 0.049(2) 0.0368(19) -0.0007(17) -0.0020(14) 0.0029(16)

C21 0.090(3) 0.0303(19) 0.0244(17) 0.0091(15) 0.0188(19) 0.020(2)

C13 0.082(3) 0.060(3) 0.044(2) 0.038(2) 0.039(2) 0.055(2)

C15 0.125(5) 0.0287(19) 0.046(2) 0.0267(18) 0.056(3) 0.036(2)

C11 0.072(3) 0.100(4) 0.034(2) 0.034(2) 0.013(2) 0.058(3)

B1 0.056(3) 0.035(2) 0.0202(17) 0.0049(15) -0.0035(17) 0.0226(19)

C8 0.093(4) 0.037(2) 0.0271(18) 0.0095(16) -0.007(2) 0.025(2)

C9 0.110(4) 0.035(2) 0.0225(17) 0.0156(15) 0.023(2) 0.029(2)

C20 0.108(5) 0.026(2) 0.057(3) 0.014(2) 0.031(3) 0.002(2)

C1 0.063(3) 0.053(3) 0.121(5) 0.047(3) -0.056(3) -0.024(2)

C16 0.216(8) 0.055(3) 0.055(3) 0.044(3) 0.083(4) 0.085(4)

C28 0.089(4) 0.056(3) 0.105(5) -0.004(3) 0.072(4) -0.006(3)

C30 0.037(3) 0.034(3) 0.026(3) 0.014(3) 0.008(2) 0.010(3)

C26 0.032(3) 0.041(4) 0.057(4) 0.015(3) 0.013(3) 0.015(3)

C29 0.039(4) 0.040(4) 0.030(3) 0.016(3) 0.001(3) 0.005(3)

C27 0.032(3) 0.045(4) 0.057(5) 0.015(3) 0.010(3) 0.011(3)

C19 0.183(8) 0.030(3) 0.080(4) 0.002(3) 0.047(5) -0.014(4)

C30B 0.031(4) 0.048(5) 0.022(3) 0.014(3) 0.013(3) 0.021(3)

C26B 0.044(5) 0.053(5) 0.030(4) 0.022(4) 0.022(3) 0.027(4)

C29B 0.027(4) 0.062(6) 0.032(4) 0.018(4) 0.009(3) 0.023(4)

C27B 0.035(4) 0.067(6) 0.044(5) 0.028(5) 0.019(4) 0.016(4)

C39 0.104(9) 0.062(6) 0.068(7) 0.034(6) 0.020(6) 0.036(6)

C37 0.040(5) 0.062(7) 0.159(14) 0.046(9) 0.016(7) 0.009(5)

C38 0.068(7) 0.075(8) 0.093(9) 0.030(7) -0.006(6) 0.027(6)

C40 0.160(15) 0.121(12) 0.039(6) 0.033(7) 0.018(7) 0.059(11)

C36 0.052(6) 0.064(8) 0.078(8) 0.012(7) 0.029(6) 0.008(5)

C41 0.27(3) 0.042(7) 0.152(17) 0.022(10) 0.17(2) 0.030(12)


_geom_special_details

;

  All esds (except the esd in the dihedral angle between two l.s. planes)

  are estimated using the full covariance matrix.  The cell esds are taken

  into account individually in the estimation of esds in distances, angles

  and torsion angles; correlations between esds in cell parameters are only

  used when they are defined by crystal symmetry.  An approximate (isotropic)

  treatment of cell esds is used for estimating esds involving l.s. planes.

;


loop_

  _geom_bond_atom_site_label_1

  _geom_bond_atom_site_label_2

  _geom_bond_distance

  _geom_bond_site_symmetry_2

  _geom_bond_publ_flag

C17 C18 1.262(16) . ?

C17 C16 1.401(11) . ?

C18 C19 1.392(14) . ?

Zn1 O1 1.918(2) . ?

Zn1 N4 2.035(3) . ?

Zn1 N2 2.037(3) . ?

Zn1 O2 2.232(2) . ?

Zn1 N6 2.267(3) . ?

O2 C35 1.271(4) . ?

O1 C31 1.319(4) . ?

N6 C24 1.348(5) . ?

N6 N5 1.375(4) . ?

N2 C4 1.333(4) . ?

N2 N1 1.369(3) . ?

N4 C14 1.350(4) . ?

N4 N3 1.373(4) . ?

N1 C2 1.348(5) . ?

N1 B1 1.549(6) . ?

N7 C35 1.357(4) . ?

N7 C34 1.374(4) . ?

C5 C10 1.387(5) . ?

C5 C6 1.389(5) . ?

C5 C4 1.478(4) . ?

N3 C12 1.355(5) . ?

N3 B1 1.551(5) . ?

N5 C22 1.354(4) . ?

N5 B1 1.540(6) . ?

C35 C31 1.448(5) . ?

C24 C23 1.402(5) . ?

C24 C25 1.464(6) . ?

C4 C3 1.389(5) . ?

C6 C7 1.393(5) . ?

C3 C2 1.385(6) . ?

C31 C32 1.373(5) . ?

C10 C9 1.404(6) . ?

C23 C22 1.374(7) . ?

C12 C13 1.365(7) . ?

C12 C11 1.475(6) . ?

C34 C33 1.347(6) . ?

C7 C8 1.384(7) . ?

C22 C21 1.494(6) . ?

C2 C1 1.509(5) . ?

C14 C13 1.384(6) . ?

C14 C15 1.481(6) . ?

C32 C33 1.408(6) . ?

C25 C30B 1.190(9) . ?

C25 C30 1.447(7) . ?

C25 C26B 1.453(9) . ?

C25 C26 1.530(8) . ?

C15 C20 1.382(8) . ?

C15 C16 1.414(6) . ?

C8 C9 1.362(7) . ?

C20 C19 1.384(7) . ?

C28 C29 1.242(10) . ?

C28 C29B 1.266(10) . ?

C28 C27 1.426(10) . ?

C28 C27B 1.778(13) . ?

C30 C29 1.390(9) . ?

C26 C27 1.403(10) . ?

C30B C29B 1.422(12) . ?

C26B C27B 1.391(13) . ?

C39 C40 1.243(18) . ?

C39 C38 1.441(16) . ?

C37 C36 1.162(19) . ?

C37 C38 1.385(16) . ?

C40 C41 1.66(3) . ?

C36 C41 1.05(3) . ?


loop_

  _geom_angle_atom_site_label_1

  _geom_angle_atom_site_label_2

  _geom_angle_atom_site_label_3

  _geom_angle

  _geom_angle_site_symmetry_1

  _geom_angle_site_symmetry_3

  _geom_angle_publ_flag

C18 C17 C16 122.5(8) . . ?

C17 C18 C19 120.7(8) . . ?

O1 Zn1 N4 129.03(13) . . ?

O1 Zn1 N2 132.56(12) . . ?

N4 Zn1 N2 98.29(12) . . ?

O1 Zn1 O2 80.33(9) . . ?

N4 Zn1 O2 102.47(10) . . ?

N2 Zn1 O2 87.00(9) . . ?

O1 Zn1 N6 99.64(11) . . ?

N4 Zn1 N6 85.28(11) . . ?

N2 Zn1 N6 85.83(11) . . ?

O2 Zn1 N6 170.13(9) . . ?

C35 O2 Zn1 105.23(19) . . ?

C31 O1 Zn1 115.9(2) . . ?

C24 N6 N5 106.2(3) . . ?

C24 N6 Zn1 141.7(3) . . ?

N5 N6 Zn1 109.2(2) . . ?

C4 N2 N1 107.2(3) . . ?

C4 N2 Zn1 134.1(2) . . ?

N1 N2 Zn1 113.9(2) . . ?

C14 N4 N3 105.8(3) . . ?

C14 N4 Zn1 138.7(3) . . ?

N3 N4 Zn1 114.0(2) . . ?

C2 N1 N2 109.3(3) . . ?

C2 N1 B1 132.4(3) . . ?

N2 N1 B1 117.8(3) . . ?

C35 N7 C34 123.2(3) . . ?

C10 C5 C6 119.2(3) . . ?

C10 C5 C4 121.3(3) . . ?

C6 C5 C4 119.5(3) . . ?

C12 N3 N4 110.0(3) . . ?

C12 N3 B1 128.3(3) . . ?

N4 N3 B1 121.4(3) . . ?

C22 N5 N6 110.4(3) . . ?

C22 N5 B1 129.4(3) . . ?

N6 N5 B1 120.1(3) . . ?

O2 C35 N7 121.5(3) . . ?

O2 C35 C31 120.6(3) . . ?

N7 C35 C31 118.0(3) . . ?

N6 C24 C23 109.5(4) . . ?

N6 C24 C25 122.1(3) . . ?

C23 C24 C25 128.3(4) . . ?

N2 C4 C3 109.9(3) . . ?

N2 C4 C5 119.3(3) . . ?

C3 C4 C5 130.7(3) . . ?

C5 C6 C7 120.7(4) . . ?

C2 C3 C4 105.6(3) . . ?

O1 C31 C32 125.1(3) . . ?

O1 C31 C35 116.6(3) . . ?

C32 C31 C35 118.2(3) . . ?

C5 C10 C9 119.4(4) . . ?

C22 C23 C24 106.4(3) . . ?

N3 C12 C13 107.8(4) . . ?

N3 C12 C11 123.1(4) . . ?

C13 C12 C11 129.1(4) . . ?

C33 C34 N7 119.5(3) . . ?


C8 C7 C6 119.7(4) . . ?

N5 C22 C23 107.5(4) . . ?

N5 C22 C21 122.5(4) . . ?

C23 C22 C21 130.0(4) . . ?

N1 C2 C3 107.9(3) . . ?

N1 C2 C1 121.7(4) . . ?

C3 C2 C1 130.3(4) . . ?

N4 C14 C13 110.0(4) . . ?

N4 C14 C15 122.2(4) . . ?

C13 C14 C15 127.9(4) . . ?

C31 C32 C33 120.8(4) . . ?

C30B C25 C30 56.5(5) . . ?

C30B C25 C26B 131.7(7) . . ?

C30 C25 C26B 88.3(5) . . ?

C30B C25 C24 120.5(5) . . ?

C30 C25 C24 128.8(4) . . ?

C26B C25 C24 107.1(5) . . ?

C30B C25 C26 79.6(5) . . ?

C30 C25 C26 107.1(5) . . ?

C26B C25 C26 81.3(5) . . ?

C24 C25 C26 123.2(4) . . ?

C34 C33 C32 120.3(3) . . ?

C12 C13 C14 106.5(3) . . ?

C20 C15 C16 119.5(5) . . ?

C20 C15 C14 123.5(4) . . ?

C16 C15 C14 116.9(6) . . ?

N5 B1 N1 108.3(3) . . ?


N5 B1 N3 108.4(4) . . ?

N1 B1 N3 110.7(3) . . ?

C9 C8 C7 119.9(4) . . ?

C8 C9 C10 121.1(4) . . ?

C15 C20 C19 117.8(7) . . ?

C17 C16 C15 118.2(8) . . ?

C29 C28 C29B 50.8(6) . . ?

C29 C28 C27 126.1(6) . . ?

C29B C28 C27 82.6(6) . . ?

C29 C28 C27B 84.5(7) . . ?

C29B C28 C27B 102.5(7) . . ?

C27 C28 C27B 80.3(6) . . ?

C29 C30 C25 126.4(6) . . ?

C27 C26 C25 125.1(6) . . ?

C28 C29 C30 118.4(7) . . ?

C26 C27 C28 113.0(7) . . ?

C20 C19 C18 121.3(10) . . ?

C25 C30B C29B 115.6(7) . . ?

C27B C26B C25 111.4(7) . . ?

C28 C29B C30B 134.7(8) . . ?

C26B C27B C28 120.9(7) . . ?

C40 C39 C38 117.9(13) . . ?

C36 C37 C38 121.8(15) . . ?

C37 C38 C39 118.0(13) . . ?

C39 C40 C41 112.4(13) . . ?

C41 C36 C37 128(2) . . ?

C36 C41 C40 120.8(14) . . ?


_diffrn_measured_fraction_theta_max    0.891

_diffrn_reflns_theta_full              27.51

_diffrn_measured_fraction_theta_full   0.891

_refine_diff_density_max    1.448

_refine_diff_density_min   -0.487

_refine_diff_density_rms    0.118

#===END

# 2. TITLE AND AUTHOR LIST


  _publ_section_title

  ;

  Examination of Novel Zinc-Binding Groups for Use in Matrix
Metalloproteinase Inhibitors�

  ;


  loop

  _publ_author_name

  _publ_author_address

       'Cohen Seth M.'

;      Department of Chemistry and Biochemistry

        University of California, San Diego

        La Jolla

        CA 92093-0358

        USA

;

       'Puerta, David T.'

;      Department of Chemistry and Biochemistry

        University of California, San Diego

        La Jolla

        CA 92093-0358

        USA

;

#=========================================================================


Data
[Zn(hydrotris(5,3-Methylphenylpyrazolyl)borate)(3-hydroxy-2-methyl-4-pyrone)]


_audit_creation_method            SHELXL-97

_chemical_name_systematic

;

  ?

;

_chemical_name_common             TpZn(Maltol)

_chemical_melting_point           ?

_chemical_formula_moiety          ?

_chemical_formula_sum

  'C39 H36 B N6 O3 Zn'

_chemical_formula_weight          712.92


loop_

  _atom_type_symbol

  _atom_type_description

  _atom_type_scat_dispersion_real

  _atom_type_scat_dispersion_imag

  _atom_type_scat_source

  'C'  'C'   0.0033   0.0016

  'International Tables Vol C Tables 4.2.6.8 and 6.1.1.4'

  'H'  'H'   0.0000   0.0000

  'International Tables Vol C Tables 4.2.6.8 and 6.1.1.4'

  'B'  'B'   0.0013   0.0007

  'International Tables Vol C Tables 4.2.6.8 and 6.1.1.4'

  'N'  'N'   0.0061   0.0033

  'International Tables Vol C Tables 4.2.6.8 and 6.1.1.4'

  'O'  'O'   0.0106   0.0060

  'International Tables Vol C Tables 4.2.6.8 and 6.1.1.4'

  'Zn'  'Zn'   0.2839   1.4301

  'International Tables Vol C Tables 4.2.6.8 and 6.1.1.4'


_symmetry_cell_setting            Triclinic

_symmetry_space_group_name_H-M    P-1


loop_

  _symmetry_equiv_pos_as_xyz

  'x, y, z'

  '-x, -y, -z'


_cell_length_a                    10.0442(8)

_cell_length_b                    10.3764(8)

_cell_length_c                    17.2365(14)

_cell_angle_alpha                 93.6090(10)

_cell_angle_beta                  101.6060(10)

_cell_angle_gamma                 93.2060(10)

_cell_volume                      1751.9(2)

_cell_formula_units_Z             2

_cell_measurement_temperature     100(2)

_cell_measurement_reflns_used     5990

_cell_measurement_theta_min       2.61

_cell_measurement_theta_max       27.47


_exptl_crystal_description        rectangular

_exptl_crystal_colour             colorless

_exptl_crystal_size_max           .35

_exptl_crystal_size_mid           .19

_exptl_crystal_size_min           .05

_exptl_crystal_density_meas       0

_exptl_crystal_density_diffrn     1.351

_exptl_crystal_density_method     'not measured'

_exptl_crystal_F_000              742

_exptl_absorpt_coefficient_mu     0.748

_exptl_absorpt_correction_type    none

_exptl_absorpt_correction_T_min   ?

_exptl_absorpt_correction_T_max   ?

_exptl_absorpt_process_details    ?


_exptl_special_details

;

  ?

;


_diffrn_ambient_temperature       100(2)

_diffrn_radiation_wavelength      0.71073

_diffrn_radiation_type            MoK\a

_diffrn_radiation_source          'fine-focus sealed tube'

_diffrn_radiation_monochromator   graphite

_diffrn_measurement_device_type   'CCD area detector'

_diffrn_measurement_method        'phi and omega scans'

_diffrn_detector_area_resol_mean  ?

_diffrn_standards_number          ?

_diffrn_standards_interval_count  ?

_diffrn_standards_interval_time   ?

_diffrn_standards_decay_%         ?

_diffrn_reflns_number             14755

_diffrn_reflns_av_R_equivalents   0.0192

_diffrn_reflns_av_sigmaI/netI     0.0268

_diffrn_reflns_limit_h_min        -12

_diffrn_reflns_limit_h_max        12

_diffrn_reflns_limit_k_min        -13

_diffrn_reflns_limit_k_max        13

_diffrn_reflns_limit_l_min        -22

_diffrn_reflns_limit_l_max        22

_diffrn_reflns_theta_min          1.21

_diffrn_reflns_theta_max          27.49

_reflns_number_total              7606

_reflns_number_gt                 7162

_reflns_threshold_expression      >2sigma(I)


_computing_data_collection        'Bruker SMART'

_computing_cell_refinement        'Bruker SMART'

_computing_data_reduction         'Bruker SAINT'

_computing_structure_solution     'SHELXS-97 (Sheldrick, 1990)'

_computing_structure_refinement   'SHELXL-97 (Sheldrick, 1997)'

_computing_molecular_graphics     'Bruker SHELXTL'

_computing_publication_material   'Bruker SHELXTL'


_refine_special_details

;

  Refinement of F^2^ against ALL reflections.  The weighted R-factor wR and

  goodness of fit S are based on F^2^, conventional R-factors R are based

  on F, with F set to zero for negative F^2^. The threshold expression of

  F^2^ > 2sigma(F^2^) is used only for calculating R-factors(gt) etc. and is

  not relevant to the choice of reflections for refinement.  R-factors based

  on F^2^ are statistically about twice as large as those based on F, and R-

  factors based on ALL data will be even larger.

;


_refine_ls_structure_factor_coef  Fsqd

_refine_ls_matrix_type            full

_refine_ls_weighting_scheme       calc

_refine_ls_weighting_details

  'calc w=1/[\s^2^(Fo^2^)+(0.0437P)^2^+0.6892P] where P=(Fo^2^+2Fc^2^)/3'

_atom_sites_solution_primary      direct

_atom_sites_solution_secondary    difmap

_atom_sites_solution_hydrogens    geom

_refine_ls_hydrogen_treatment     mixed

_refine_ls_extinction_method      none

_refine_ls_extinction_coef        ?

_refine_ls_number_reflns          7606

_refine_ls_number_parameters      459

_refine_ls_number_restraints      0

_refine_ls_R_factor_all           0.0309

_refine_ls_R_factor_gt            0.0291

_refine_ls_wR_factor_ref          0.0804

_refine_ls_wR_factor_gt           0.0791

_refine_ls_goodness_of_fit_ref    1.046

_refine_ls_restrained_S_all       1.046

_refine_ls_shift/su_max           0.049

_refine_ls_shift/su_mean          0.003


loop_

  _atom_site_label

  _atom_site_type_symbol

  _atom_site_fract_x

  _atom_site_fract_y

  _atom_site_fract_z

  _atom_site_U_iso_or_equiv

  _atom_site_adp_type

  _atom_site_occupancy

  _atom_site_symmetry_multiplicity

  _atom_site_calc_flag

  _atom_site_refinement_flags

  _atom_site_disorder_assembly

  _atom_site_disorder_group

C28 C 0.28654(16) 1.07360(15) 0.91950(9) 0.0278(3) Uani 1 1 d . . .

H28 H 0.2178 1.0774 0.9500 0.033 Uiso 1 1 calc R . .

C29 C 0.25714(15) 1.01277(14) 0.84330(9) 0.0257(3) Uani 1 1 d . . .

H29 H 0.1683 0.9740 0.8219 0.031 Uiso 1 1 calc R . .

C18 C 0.14431(16) 0.42770(15) 0.53467(10) 0.0304(3) Uani 1 1 d . . .

H18 H 0.0757 0.3616 0.5362 0.036 Uiso 1 1 calc R . .

C17 C 0.21108(16) 0.42693(15) 0.47167(10) 0.0295(3) Uani 1 1 d . . .

H17 H 0.1874 0.3605 0.4298 0.035 Uiso 1 1 calc R . .

Zn1 Zn 0.582909(15) 0.762990(14) 0.710095(9) 0.01741(6) Uani 1 1 d . . .

O1 O 0.47450(10) 0.74255(9) 0.79016(6) 0.0215(2) Uani 1 1 d . . .

O3 O 0.55135(10) 0.55202(9) 0.69930(6) 0.0209(2) Uani 1 1 d . . .

N2 N 0.79127(11) 0.76561(11) 0.72056(7) 0.0177(2) Uani 1 1 d . . .

N4 N 0.54012(11) 0.77863(11) 0.59095(7) 0.0182(2) Uani 1 1 d . . .

N6 N 0.60419(12) 0.97803(11) 0.72511(7) 0.0186(2) Uani 1 1 d . . .

N5 N 0.69767(12) 1.02663(11) 0.68426(7) 0.0185(2) Uani 1 1 d . . .

N1 N 0.84130(11) 0.84291(11) 0.66954(7) 0.0176(2) Uani 1 1 d . . .

C36 C 0.47412(14) 0.52078(13) 0.74497(8) 0.0196(3) Uani 1 1 d . . .

O2 O 0.31078(11) 0.46004(10) 0.85354(6) 0.0259(2) Uani 1 1 d . . .

N3 N 0.62796(12) 0.86420(11) 0.56450(7) 0.0187(2) Uani 1 1 d . . .

C31 C 0.43259(14) 0.62136(13) 0.79614(8) 0.0189(3) Uani 1 1 d . . .

C4 C 0.89492(14) 0.69963(13) 0.75574(8) 0.0182(3) Uani 1 1 d . . .

C14 C 0.45615(14) 0.72035(13) 0.52644(8) 0.0191(3) Uani 1 1 d . . .

C6 C 0.78225(14) 0.61898(14) 0.86268(8) 0.0219(3) Uani 1 1 d . . .

H6 H 0.7222 0.6868 0.8558 0.026 Uiso 1 1 calc R . .

B1 B 0.74851(16) 0.93889(15) 0.62263(9) 0.0188(3) Uani 1 1 d . . .

C32 C 0.35409(14) 0.58720(13) 0.84866(8) 0.0210(3) Uani 1 1 d . . .

C3 C 1.01264(14) 0.73513(13) 0.72777(8) 0.0205(3) Uani 1 1 d . . .

H3 H 1.1003 0.7034 0.7430 0.025 Uiso 1 1 calc R . .

C23 C 0.67656(14) 1.18263(13) 0.77292(8) 0.0213(3) Uani 1 1 d . . .

H23 H 0.6870 1.2626 0.8043 0.026 Uiso 1 1 calc R . .

C22 C 0.74302(14) 1.14930(13) 0.71270(8) 0.0202(3) Uani 1 1 d . . .

C2 C 0.97487(14) 0.82554(13) 0.67365(8) 0.0198(3) Uani 1 1 d . . .

C10 C 0.96822(14) 0.50797(13) 0.82739(8) 0.0216(3) Uani 1 1 d . . .

H10 H 1.0351 0.4994 0.7959 0.026 Uiso 1 1 calc R . .

C5 C 0.87981(14) 0.60725(13) 0.81552(8) 0.0190(3) Uani 1 1 d . . .

C9 C 0.95945(16) 0.42151(14) 0.88485(9) 0.0258(3) Uani 1 1 d . . .

H9 H 1.0204 0.3545 0.8927 0.031 Uiso 1 1 calc R . .

C15 C 0.34753(14) 0.62092(13) 0.53035(8) 0.0196(3) Uani 1 1 d . . .

C13 C 0.48887(14) 0.76853(14) 0.45790(8) 0.0225(3) Uani 1 1 d . . .

H13 H 0.4453 0.7441 0.4044 0.027 Uiso 1 1 calc R . .

C20 C 0.27873(14) 0.62191(14) 0.59327(8) 0.0224(3) Uani 1 1 d . . .

H20 H 0.3009 0.6890 0.6348 0.027 Uiso 1 1 calc R . .

C30 C 0.35735(15) 1.00852(13) 0.79821(9) 0.0225(3) Uani 1 1 d . . .

H30 H 0.3368 0.9661 0.7463 0.027 Uiso 1 1 calc R . .

C25 C 0.48774(14) 1.06610(13) 0.82864(8) 0.0202(3) Uani 1 1 d . . .

C8 C 0.86119(16) 0.43341(15) 0.93075(9) 0.0268(3) Uani 1 1 d . . .

H8 H 0.8546 0.3741 0.9698 0.032 Uiso 1 1 calc R . .

C24 C 0.59016(14) 1.07365(13) 0.77827(8) 0.0193(3) Uani 1 1 d . . .

C1 C 1.05829(15) 0.89653(15) 0.62499(9) 0.0264(3) Uani 1 1 d . . .

H1A H 1.0147 0.8820 0.5687 0.040 Uiso 1 1 calc R . .

H1B H 1.1498 0.8647 0.6334 0.040 Uiso 1 1 calc R . .

H1C H 1.0650 0.9893 0.6410 0.040 Uiso 1 1 calc R . .

C12 C 0.59734(14) 0.85868(14) 0.48416(8) 0.0214(3) Uani 1 1 d . . .

C33 C 0.30790(16) 0.67742(15) 0.90652(9) 0.0260(3) Uani 1 1 d . . .

H33A H 0.3392 0.7664 0.8998 0.039 Uiso 1 1 calc R . .

H33B H 0.3458 0.6555 0.9606 0.039 Uiso 1 1 calc R . .

H33C H 0.2082 0.6699 0.8973 0.039 Uiso 1 1 calc R . .

C26 C 0.51660(15) 1.12582(16) 0.90541(9) 0.0274(3) Uani 1 1 d . . .

H26 H 0.6052 1.1649 0.9269 0.033 Uiso 1 1 calc R . .

C7 C 0.77287(15) 0.53162(15) 0.91958(9) 0.0251(3) Uani 1 1 d . . .

H7 H 0.7056 0.5393 0.9509 0.030 Uiso 1 1 calc R . .

C16 C 0.31228(15) 0.52257(14) 0.46921(9) 0.0247(3) Uani 1 1 d . . .

H16 H 0.3576 0.5211 0.4259 0.030 Uiso 1 1 calc R . .

C21 C 0.84518(16) 1.22864(14) 0.67982(9) 0.0267(3) Uani 1 1 d . . .

H21A H 0.9356 1.1964 0.6964 0.040 Uiso 1 1 calc R . .

H21B H 0.8470 1.3194 0.6999 0.040 Uiso 1 1 calc R . .

H21C H 0.8196 1.2219 0.6217 0.040 Uiso 1 1 calc R . .


C34 C 0.34412(16) 0.36765(14) 0.80433(10) 0.0282(3) Uani 1 1 d . . .

H34 H 0.3114 0.2808 0.8074 0.034 Uiso 1 1 calc R . .

C19 C 0.17800(15) 0.52520(15) 0.59534(9) 0.0272(3) Uani 1 1 d . . .

H19 H 0.1322 0.5261 0.6385 0.033 Uiso 1 1 calc R . .

C11 C 0.67298(16) 0.94000(16) 0.43641(9) 0.0276(3) Uani 1 1 d . . .

H11A H 0.6726 1.0315 0.4544 0.041 Uiso 1 1 calc R . .

H11B H 0.6287 0.9265 0.3801 0.041 Uiso 1 1 calc R . .

H11C H 0.7672 0.9154 0.4434 0.041 Uiso 1 1 calc R . .

C35 C 0.42138(15) 0.39129(14) 0.75083(9) 0.0251(3) Uani 1 1 d . . .

H35 H 0.4410 0.3223 0.7169 0.030 Uiso 1 1 calc R . .

C27 C 0.41688(17) 1.12874(17) 0.95078(9) 0.0316(3) Uani 1 1 d . . .

H27 H 0.4380 1.1686 1.0033 0.038 Uiso 1 1 calc R . .

C39 C 0.07403(15) 0.91652(15) 1.04876(9) 0.0249(3) Uani 1 1 d . . .

H39 H 0.1247 0.8592 1.0821 0.030 Uiso 1 1 calc R . .

C38 C 0.00636(15) 0.87250(15) 0.97269(9) 0.0264(3) Uani 1 1 d . . .

H38 H 0.0108 0.7851 0.9540 0.032 Uiso 1 1 calc R . .

C37 C -0.06797(15) 0.95589(15) 0.92367(9) 0.0253(3) Uani 1 1 d . . .

H37 H -0.1144 0.9257 0.8715 0.030 Uiso 1 1 calc R . .

H40 H 0.8081(16) 0.9951(16) 0.5881(10) 0.018(4) Uiso 1 1 d . . .


loop_

  _atom_site_aniso_label

  _atom_site_aniso_U_11

  _atom_site_aniso_U_22

  _atom_site_aniso_U_33

  _atom_site_aniso_U_23

  _atom_site_aniso_U_13

  _atom_site_aniso_U_12

C28 0.0271(7) 0.0296(8) 0.0313(8) 0.0049(6) 0.0161(6) 0.0005(6)

C29 0.0221(7) 0.0236(7) 0.0329(8) 0.0031(6) 0.0100(6) -0.0026(5)

C18 0.0228(7) 0.0269(8) 0.0405(9) 0.0007(6) 0.0064(6) -0.0039(6)

C17 0.0270(8) 0.0247(7) 0.0341(8) -0.0066(6) 0.0036(6) -0.0006(6)

Zn1 0.01790(9) 0.01904(9) 0.01691(9) 0.00351(6) 0.00747(6) -0.00128(6)

O1 0.0266(5) 0.0172(5) 0.0234(5) 0.0018(4) 0.0127(4) -0.0022(4)

O3 0.0212(5) 0.0216(5) 0.0221(5) 0.0030(4) 0.0099(4) 0.0003(4)

N2 0.0198(5) 0.0175(5) 0.0173(5) 0.0037(4) 0.0074(4) -0.0019(4)

N4 0.0197(5) 0.0178(5) 0.0190(5) 0.0035(4) 0.0080(4) -0.0002(4)

N6 0.0194(5) 0.0195(6) 0.0185(5) 0.0037(4) 0.0075(4) 0.0000(4)

N5 0.0192(5) 0.0183(5) 0.0198(5) 0.0040(4) 0.0080(4) -0.0009(4)

N1 0.0195(5) 0.0170(5) 0.0181(5) 0.0031(4) 0.0083(4) -0.0017(4)

C36 0.0175(6) 0.0202(6) 0.0219(7) 0.0044(5) 0.0050(5) 0.0016(5)

O2 0.0266(5) 0.0216(5) 0.0342(6) 0.0094(4) 0.0155(4) 0.0001(4)

N3 0.0205(6) 0.0194(5) 0.0181(5) 0.0046(4) 0.0078(4) 0.0000(4)

C31 0.0181(6) 0.0194(6) 0.0201(6) 0.0046(5) 0.0051(5) 0.0005(5)

C4 0.0203(6) 0.0172(6) 0.0175(6) -0.0002(5) 0.0058(5) -0.0008(5)

C14 0.0190(6) 0.0191(6) 0.0200(6) 0.0013(5) 0.0056(5) 0.0033(5)

C6 0.0223(7) 0.0235(7) 0.0203(6) 0.0032(5) 0.0054(5) -0.0002(5)

B1 0.0203(7) 0.0184(7) 0.0192(7) 0.0028(5) 0.0078(6) -0.0007(5)

C32 0.0204(6) 0.0204(7) 0.0239(7) 0.0057(5) 0.0075(5) 0.0002(5)

C3 0.0179(6) 0.0220(7) 0.0220(7) 0.0018(5) 0.0053(5) -0.0002(5)

C23 0.0188(6) 0.0205(7) 0.0237(7) -0.0008(5) 0.0037(5) -0.0014(5)

C22 0.0188(6) 0.0191(6) 0.0227(7) 0.0028(5) 0.0042(5) -0.0006(5)

C2 0.0197(6) 0.0201(6) 0.0207(6) 0.0008(5) 0.0080(5) -0.0021(5)

C10 0.0210(7) 0.0217(7) 0.0222(7) 0.0017(5) 0.0047(5) -0.0010(5)

C5 0.0196(6) 0.0194(6) 0.0169(6) 0.0014(5) 0.0026(5) -0.0031(5)

C9 0.0266(7) 0.0227(7) 0.0279(7) 0.0068(6) 0.0039(6) 0.0018(6)

C15 0.0177(6) 0.0201(6) 0.0209(6) 0.0021(5) 0.0030(5) 0.0023(5)

C13 0.0230(7) 0.0277(7) 0.0175(6) 0.0033(5) 0.0047(5) 0.0031(5)

C20 0.0192(6) 0.0242(7) 0.0235(7) -0.0012(5) 0.0048(5) 0.0005(5)

C30 0.0241(7) 0.0197(6) 0.0242(7) 0.0009(5) 0.0072(5) -0.0002(5)

C25 0.0202(6) 0.0198(6) 0.0223(7) 0.0037(5) 0.0071(5) 0.0028(5)

C8 0.0316(8) 0.0257(7) 0.0230(7) 0.0087(6) 0.0051(6) -0.0031(6)

C24 0.0180(6) 0.0211(6) 0.0191(6) 0.0026(5) 0.0038(5) 0.0013(5)

C1 0.0218(7) 0.0304(8) 0.0310(8) 0.0091(6) 0.0134(6) -0.0008(6)

C12 0.0236(7) 0.0238(7) 0.0191(6) 0.0051(5) 0.0080(5) 0.0050(5)

C33 0.0272(7) 0.0291(7) 0.0251(7) 0.0021(6) 0.0143(6) -0.0014(6)

C26 0.0214(7) 0.0362(8) 0.0245(7) -0.0015(6) 0.0061(6) -0.0012(6)

C7 0.0263(7) 0.0294(7) 0.0209(7) 0.0048(6) 0.0081(6) -0.0024(6)

C16 0.0240(7) 0.0263(7) 0.0240(7) -0.0014(6) 0.0059(6) 0.0037(6)

C21 0.0266(7) 0.0229(7) 0.0322(8) 0.0011(6) 0.0117(6) -0.0063(6)

C34 0.0280(8) 0.0185(7) 0.0416(9) 0.0080(6) 0.0137(6) 0.0013(6)

C19 0.0218(7) 0.0305(8) 0.0305(8) 0.0030(6) 0.0089(6) -0.0010(6)

C11 0.0302(8) 0.0341(8) 0.0213(7) 0.0098(6) 0.0101(6) -0.0001(6)

C35 0.0265(7) 0.0174(6) 0.0341(8) 0.0039(6) 0.0115(6) 0.0022(5)

C27 0.0311(8) 0.0416(9) 0.0235(7) -0.0031(6) 0.0113(6) -0.0006(7)

C39 0.0208(7) 0.0262(7) 0.0285(7) 0.0068(6) 0.0056(6) 0.0014(5)

C38 0.0242(7) 0.0226(7) 0.0328(8) -0.0012(6) 0.0082(6) 0.0004(5)

C37 0.0224(7) 0.0307(8) 0.0223(7) -0.0008(6) 0.0056(5) -0.0023(6)


_geom_special_details

;

  All esds (except the esd in the dihedral angle between two l.s. planes)

  are estimated using the full covariance matrix.  The cell esds are taken

  into account individually in the estimation of esds in distances, angles

  and torsion angles; correlations between esds in cell parameters are only

  used when they are defined by crystal symmetry.  An approximate (isotropic)

  treatment of cell esds is used for estimating esds involving l.s. planes.

;


loop_

  _geom_bond_atom_site_label_1

  _geom_bond_atom_site_label_2

  _geom_bond_distance

  _geom_bond_site_symmetry_2

  _geom_bond_publ_flag

C28 C27 1.388(2) . ?

C28 C29 1.389(2) . ?

C29 C30 1.391(2) . ?

C18 C19 1.385(2) . ?

C18 C17 1.386(2) . ?

C17 C16 1.389(2) . ?

Zn1 O1 1.9367(10) . ?

Zn1 N4 2.0305(11) . ?

Zn1 N2 2.0626(12) . ?

Zn1 O3 2.1851(10) . ?

Zn1 N6 2.2233(12) . ?

O1 C31 1.3205(16) . ?

O3 C36 1.2554(17) . ?

N2 C4 1.3410(18) . ?

N2 N1 1.3750(15) . ?

N4 C14 1.3396(18) . ?

N4 N3 1.3784(15) . ?

N6 C24 1.3407(18) . ?

N6 N5 1.3746(15) . ?

N5 C22 1.3545(17) . ?

N5 B1 1.5383(18) . ?

N1 C2 1.3519(18) . ?

N1 B1 1.5545(19) . ?

C36 C35 1.4336(19) . ?

C36 C31 1.4566(19) . ?

O2 C34 1.3411(19) . ?

O2 C32 1.3791(17) . ?

N3 C12 1.3535(18) . ?

N3 B1 1.5426(19) . ?

C31 C32 1.3650(19) . ?

C4 C3 1.4033(19) . ?

C4 C5 1.4747(18) . ?

C14 C13 1.4020(19) . ?

C14 C15 1.4737(19) . ?

C6 C7 1.390(2) . ?

C6 C5 1.3991(19) . ?

C32 C33 1.485(2) . ?

C3 C2 1.379(2) . ?

C23 C22 1.3792(19) . ?

C23 C24 1.4056(19) . ?

C22 C21 1.5001(19) . ?

C2 C1 1.4966(18) . ?

C10 C9 1.390(2) . ?

C10 C5 1.395(2) . ?

C9 C8 1.389(2) . ?

C15 C16 1.397(2) . ?

C15 C20 1.3981(19) . ?

C13 C12 1.379(2) . ?

C20 C19 1.392(2) . ?

C30 C25 1.394(2) . ?

C25 C26 1.393(2) . ?

C25 C24 1.4756(19) . ?

C8 C7 1.385(2) . ?

C12 C11 1.4946(19) . ?

C26 C27 1.390(2) . ?

C34 C35 1.345(2) . ?

C39 C38 1.386(2) . ?

C39 C37 1.387(2) 2_577 ?

C38 C37 1.389(2) . ?

C37 C39 1.387(2) 2_577 ?


loop_

  _geom_angle_atom_site_label_1

  _geom_angle_atom_site_label_2

  _geom_angle_atom_site_label_3

  _geom_angle

  _geom_angle_site_symmetry_1

  _geom_angle_site_symmetry_3

  _geom_angle_publ_flag

C27 C28 C29 119.65(14) . . ?

C28 C29 C30 120.19(14) . . ?

C19 C18 C17 119.73(14) . . ?

C18 C17 C16 120.54(14) . . ?

O1 Zn1 N4 134.73(5) . . ?

O1 Zn1 N2 129.69(4) . . ?

N4 Zn1 N2 95.51(4) . . ?

O1 Zn1 O3 81.15(4) . . ?

N4 Zn1 O3 94.07(4) . . ?

N2 Zn1 O3 94.90(4) . . ?

O1 Zn1 N6 95.38(4) . . ?

N4 Zn1 N6 87.63(4) . . ?

N2 Zn1 N6 88.12(4) . . ?

O3 Zn1 N6 176.38(4) . . ?

C31 O1 Zn1 113.89(8) . . ?

C36 O3 Zn1 107.71(8) . . ?

C4 N2 N1 106.78(11) . . ?

C4 N2 Zn1 138.20(9) . . ?

N1 N2 Zn1 114.25(8) . . ?

C14 N4 N3 106.92(11) . . ?

C14 N4 Zn1 138.26(9) . . ?

N3 N4 Zn1 114.47(8) . . ?

C24 N6 N5 105.85(11) . . ?

C24 N6 Zn1 139.01(9) . . ?

N5 N6 Zn1 110.95(8) . . ?

C22 N5 N6 110.68(11) . . ?

C22 N5 B1 128.60(11) . . ?

N6 N5 B1 120.34(11) . . ?

C2 N1 N2 109.77(11) . . ?

C2 N1 B1 130.09(11) . . ?

N2 N1 B1 119.98(11) . . ?

O3 C36 C35 124.77(13) . . ?

O3 C36 C31 119.02(12) . . ?

C35 C36 C31 116.21(12) . . ?

C34 O2 C32 119.25(11) . . ?

C12 N3 N4 109.43(11) . . ?

C12 N3 B1 129.09(12) . . ?

N4 N3 B1 121.18(11) . . ?

O1 C31 C32 122.72(13) . . ?

O1 C31 C36 118.04(12) . . ?

C32 C31 C36 119.24(13) . . ?

N2 C4 C3 109.63(12) . . ?

N2 C4 C5 122.30(12) . . ?

C3 C4 C5 128.05(13) . . ?

N4 C14 C13 109.66(12) . . ?

N4 C14 C15 123.21(12) . . ?

C13 C14 C15 127.13(13) . . ?

C7 C6 C5 120.19(14) . . ?

N5 B1 N3 110.91(11) . . ?

N5 B1 N1 106.91(11) . . ?

N3 B1 N1 110.31(11) . . ?

C31 C32 O2 121.73(13) . . ?

C31 C32 C33 125.63(13) . . ?

O2 C32 C33 112.63(12) . . ?

C2 C3 C4 105.82(12) . . ?

C22 C23 C24 105.68(12) . . ?

N5 C22 C23 107.47(12) . . ?

N5 C22 C21 123.25(13) . . ?

C23 C22 C21 129.27(13) . . ?

N1 C2 C3 108.00(11) . . ?

N1 C2 C1 122.49(13) . . ?

C3 C2 C1 129.51(13) . . ?

C9 C10 C5 120.71(13) . . ?

C10 C5 C6 118.97(13) . . ?

C10 C5 C4 119.20(12) . . ?

C6 C5 C4 121.80(12) . . ?

C8 C9 C10 119.75(14) . . ?

C16 C15 C20 119.00(13) . . ?

C16 C15 C14 118.89(13) . . ?

C20 C15 C14 122.11(12) . . ?

C12 C13 C14 105.84(12) . . ?

C19 C20 C15 120.36(13) . . ?

C29 C30 C25 120.46(13) . . ?

C26 C25 C30 118.92(13) . . ?

C26 C25 C24 120.22(13) . . ?

C30 C25 C24 120.65(13) . . ?

C7 C8 C9 120.09(13) . . ?

N6 C24 C23 110.31(12) . . ?

N6 C24 C25 123.22(12) . . ?

C23 C24 C25 126.22(13) . . ?

N3 C12 C13 108.14(12) . . ?

N3 C12 C11 123.14(13) . . ?

C13 C12 C11 128.72(13) . . ?

C27 C26 C25 120.59(14) . . ?

C8 C7 C6 120.28(14) . . ?

C17 C16 C15 120.15(14) . . ?

O2 C34 C35 123.53(13) . . ?

C18 C19 C20 120.21(14) . . ?

C34 C35 C36 119.93(14) . . ?

C28 C27 C26 120.17(14) . . ?

C38 C39 C37 120.16(14) . 2_577 ?

C39 C38 C37 120.19(14) . . ?

C39 C37 C38 119.64(14) 2_577 . ?


_diffrn_measured_fraction_theta_max    0.947

_diffrn_reflns_theta_full              27.49

_diffrn_measured_fraction_theta_full   0.947

_refine_diff_density_max    0.418

_refine_diff_density_min   -0.397

_refine_diff_density_rms    0.053

#===END

# 2. TITLE AND AUTHOR LIST


  _publ_section_title

  ;

  Examination of Novel Zinc-Binding Groups for Use in Matrix
Metalloproteinase Inhibitors�

  ;


  loop

  _publ_author_name

  _publ_author_address

       'Cohen Seth M.'

;      Department of Chemistry and Biochemistry

        University of California, San Diego

        La Jolla

        CA 92093-0358

        USA

;

       'Puerta, David T.'

;      Department of Chemistry and Biochemistry

        University of California, San Diego

        La Jolla

        CA 92093-0358

        USA

;

#=========================================================================


data_[Zn(hydrotris(5,3-Methylphenylpyrazolyl)borate)(3-hydroxy-1,2-dim 
ethyl-4(1H)-pyridinone)]


_audit_creation_method            SHELXL-97

_chemical_name_systematic

;

  ?

;

_chemical_name_common             TpZn(3-hydroxy-1,2-dimethyl-4(1H)-pyridinone)

_chemical_melting_point           ?

_chemical_formula_moiety          ?

_chemical_formula_sum

  'C37 H36 B N7 O2 Zn'

_chemical_formula_weight          686.91


loop_

  _atom_type_symbol

  _atom_type_description

  _atom_type_scat_dispersion_real

  _atom_type_scat_dispersion_imag

  _atom_type_scat_source

  'C'  'C'   0.0033   0.0016

  'International Tables Vol C Tables 4.2.6.8 and 6.1.1.4'

  'H'  'H'   0.0000   0.0000

  'International Tables Vol C Tables 4.2.6.8 and 6.1.1.4'

  'B'  'B'   0.0013   0.0007

  'International Tables Vol C Tables 4.2.6.8 and 6.1.1.4'

  'N'  'N'   0.0061   0.0033

  'International Tables Vol C Tables 4.2.6.8 and 6.1.1.4'

  'O'  'O'   0.0106   0.0060

  'International Tables Vol C Tables 4.2.6.8 and 6.1.1.4'

  'Zn'  'Zn'   0.2839   1.4301

  'International Tables Vol C Tables 4.2.6.8 and 6.1.1.4'


_symmetry_cell_setting            Monoclinic

_symmetry_space_group_name_H-M    P2(1)/n


loop_

  _symmetry_equiv_pos_as_xyz

  'x, y, z'

  '-x+1/2, y+1/2, -z+1/2'

  '-x, -y, -z'

  'x-1/2, -y-1/2, z-1/2'


_cell_length_a                    12.2147(14)

_cell_length_b                    11.0738(13)

_cell_length_c                    24.646(3)

_cell_angle_alpha                 90.00

_cell_angle_beta                  100.944(2)

_cell_angle_gamma                 90.00

_cell_volume                      3273.0(7)

_cell_formula_units_Z             4

_cell_measurement_temperature     100(2)

_cell_measurement_reflns_used     4087

_cell_measurement_theta_min       2.49

_cell_measurement_theta_max       23.48


_exptl_crystal_description        rod


_exptl_crystal_colour             colorless

_exptl_crystal_size_max           0.17

_exptl_crystal_size_mid           0.10

_exptl_crystal_size_min           0.02

_exptl_crystal_density_meas       0

_exptl_crystal_density_diffrn     1.394

_exptl_crystal_density_method     'not measured'

_exptl_crystal_F_000              1432

_exptl_absorpt_coefficient_mu     0.796

_exptl_absorpt_correction_type    none

_exptl_absorpt_correction_T_min   ?

_exptl_absorpt_correction_T_max   ?

_exptl_absorpt_process_details    ?


_exptl_special_details

;

  ?

;


_diffrn_ambient_temperature       100(2)

_diffrn_radiation_wavelength      0.71073

_diffrn_radiation_type            MoK\a

_diffrn_radiation_source          'fine-focus sealed tube'

_diffrn_radiation_monochromator   graphite

_diffrn_measurement_device_type   'CCD area detector'

_diffrn_measurement_method        'phi and omega scans'

_diffrn_detector_area_resol_mean  ?

_diffrn_standards_number          ?

_diffrn_standards_interval_count  ?

_diffrn_standards_interval_time   ?

_diffrn_standards_decay_%         ?

_diffrn_reflns_number             27739

_diffrn_reflns_av_R_equivalents   0.0487

_diffrn_reflns_av_sigmaI/netI     0.0536

_diffrn_reflns_limit_h_min        -15

_diffrn_reflns_limit_h_max        15

_diffrn_reflns_limit_k_min        -14

_diffrn_reflns_limit_k_max        14

_diffrn_reflns_limit_l_min        -31

_diffrn_reflns_limit_l_max        31

_diffrn_reflns_theta_min          1.68

_diffrn_reflns_theta_max          27.54

_reflns_number_total              7497

_reflns_number_gt                 5819

_reflns_threshold_expression      >2sigma(I)


_computing_data_collection        'Bruker SMART'

_computing_cell_refinement        'Bruker SMART'

_computing_data_reduction         'Bruker SAINT'

_computing_structure_solution     'SHELXS-97 (Sheldrick, 1990)'

_computing_structure_refinement   'SHELXL-97 (Sheldrick, 1997)'

_computing_molecular_graphics     'Bruker SHELXTL'

_computing_publication_material   'Bruker SHELXTL'


_refine_special_details

;

  Refinement of F^2^ against ALL reflections.  The weighted R-factor wR and

  goodness of fit S are based on F^2^, conventional R-factors R are based

  on F, with F set to zero for negative F^2^. The threshold expression of

  F^2^ > 2sigma(F^2^) is used only for calculating R-factors(gt) etc. and is

  not relevant to the choice of reflections for refinement.  R-factors based

  on F^2^ are statistically about twice as large as those based on F, and R-

  factors based on ALL data will be even larger.

;


_refine_ls_structure_factor_coef  Fsqd

_refine_ls_matrix_type            full

_refine_ls_weighting_scheme       calc

_refine_ls_weighting_details

  'calc w=1/[\s^2^(Fo^2^)+(0.0384P)^2^+1.4355P] where P=(Fo^2^+2Fc^2^)/3'

_atom_sites_solution_primary      direct

_atom_sites_solution_secondary    difmap

_atom_sites_solution_hydrogens    geom

_refine_ls_hydrogen_treatment     mixed

_refine_ls_extinction_method      none

_refine_ls_extinction_coef        ?

_refine_ls_number_reflns          7497

_refine_ls_number_parameters      442

_refine_ls_number_restraints      0

_refine_ls_R_factor_all           0.0617

_refine_ls_R_factor_gt            0.0410

_refine_ls_wR_factor_ref          0.0920

_refine_ls_wR_factor_gt           0.0847

_refine_ls_goodness_of_fit_ref    1.009

_refine_ls_restrained_S_all       1.009

_refine_ls_shift/su_max           0.671

_refine_ls_shift/su_mean          0.050


loop_

  _atom_site_label

  _atom_site_type_symbol

  _atom_site_fract_x

  _atom_site_fract_y

  _atom_site_fract_z

  _atom_site_U_iso_or_equiv

  _atom_site_adp_type

  _atom_site_occupancy

  _atom_site_symmetry_multiplicity

  _atom_site_calc_flag

  _atom_site_refinement_flags

  _atom_site_disorder_assembly

  _atom_site_disorder_group

Zn1 Zn 0.75608(2) 0.30750(2) 0.598702(10) 0.01617(8) Uani 1 1 d . . .

O2 O 0.63488(12) 0.18645(13) 0.56524(6) 0.0209(3) Uani 1 1 d . . .

N6 N 0.79776(14) 0.36217(15) 0.52379(7) 0.0168(4) Uani 1 1 d . . .

O1 O 0.78869(12) 0.18590(13) 0.65761(6) 0.0206(3) Uani 1 1 d . . .

C6 C 0.53830(18) 0.29577(19) 0.66907(9) 0.0187(4) Uani 1 1 d . . .

H6 H 0.6165 0.2846 0.6731 0.022 Uiso 1 1 calc R . .

N4 N 0.90526(14) 0.40911(15) 0.63505(7) 0.0168(4) Uani 1 1 d . . .

N5 N 0.82745(14) 0.48176(15) 0.52199(7) 0.0157(4) Uani 1 1 d . . .

C24 C 0.80963(16) 0.31379(19) 0.47528(8) 0.0166(4) Uani 1 1 d . . .

N1 N 0.68975(14) 0.55369(15) 0.57760(7) 0.0165(4) Uani 1 1 d . . .

C20 C 1.03290(17) 0.18277(19) 0.66093(9) 0.0197(5) Uani 1 1 d . . .

H20 H 1.0013 0.1937 0.6229 0.024 Uiso 1 1 calc R . .

N3 N 0.89379(14) 0.52933(15) 0.62244(7) 0.0164(4) Uani 1 1 d . . .

N2 N 0.65915(14) 0.45954(15) 0.60795(7) 0.0165(4) Uani 1 1 d . . .

C19 C 1.07434(18) 0.0710(2) 0.67926(10) 0.0235(5) Uani 1 1 d . . .

H19 H 1.0715 0.0058 0.6540 0.028 Uiso 1 1 calc R . .

C25 C 0.78867(17) 0.18523(19) 0.46240(9) 0.0185(4) Uani 1 1 d . . .

C31 C 0.72320(17) 0.09097(18) 0.64677(9) 0.0186(4) Uani 1 1 d . . .

C7 C 0.47746(19) 0.2196(2) 0.69679(9) 0.0219(5) Uani 1 1 d . . .

H7 H 0.5139 0.1561 0.7191 0.026 Uiso 1 1 calc R . .

C5 C 0.48654(17) 0.38805(19) 0.63554(8) 0.0169(4) Uani 1 1 d . . .

C11 C 0.98348(19) 0.72825(19) 0.65180(9) 0.0230(5) Uani 1 1 d . . .

H11A H 0.9991 0.7493 0.6154 0.035 Uiso 1 1 calc R . .

H11B H 1.0446 0.7567 0.6806 0.035 Uiso 1 1 calc R . .

H11C H 0.9137 0.7666 0.6567 0.035 Uiso 1 1 calc R . .

C4 C 0.54886(17) 0.47072(18) 0.60553(8) 0.0164(4) Uani 1 1 d . . .

C15 C 1.03654(17) 0.27982(19) 0.69716(9) 0.0172(4) Uani 1 1 d . . .

C12 C 0.97290(17) 0.59413(19) 0.65600(9) 0.0178(4) Uani 1 1 d . . .

C14 C 0.99336(17) 0.39904(19) 0.67644(8) 0.0154(4) Uani 1 1 d . . .

C22 C 0.85739(17) 0.50678(19) 0.47324(9) 0.0173(4) Uani 1 1 d . . .

C23 C 0.84588(17) 0.40237(19) 0.44227(9) 0.0183(4) Uani 1 1 d . . .

H23 H 0.8597 0.3925 0.4059 0.022 Uiso 1 1 calc R . .

C2 C 0.59926(17) 0.61880(18) 0.55462(9) 0.0177(4) Uani 1 1 d . . .

C26 C 0.73741(19) 0.1521(2) 0.40921(9) 0.0238(5) Uani 1 1 d . . .

H26 H 0.7168 0.2126 0.3818 0.029 Uiso 1 1 calc R . .

C13 C 1.03729(18) 0.51381(19) 0.69112(9) 0.0188(5) Uani 1 1 d . . .

H13 H 1.0990 0.5326 0.7196 0.023 Uiso 1 1 calc R . .

C30 C 0.81969(19) 0.0955(2) 0.50155(9) 0.0236(5) Uani 1 1 d . . .

H30 H 0.8556 0.1165 0.5380 0.028 Uiso 1 1 calc R . .

C37 C 0.63935(18) 0.09373(19) 0.59695(9) 0.0194(5) Uani 1 1 d . . .

C9 C 0.31124(19) 0.3285(2) 0.65922(9) 0.0243(5) Uani 1 1 d . . .

H9 H 0.2333 0.3407 0.6561 0.029 Uiso 1 1 calc R . .

C1 C 0.60479(19) 0.71928(19) 0.51500(9) 0.0235(5) Uani 1 1 d . . .

H1A H 0.6531 0.7835 0.5336 0.035 Uiso 1 1 calc R . .

H1B H 0.5297 0.7515 0.5018 0.035 Uiso 1 1 calc R . .

H1C H 0.6352 0.6890 0.4836 0.035 Uiso 1 1 calc R . .

C8 C 0.36360(19) 0.2361(2) 0.69204(9) 0.0243(5) Uani 1 1 d . . .

H8 H 0.3218 0.1843 0.7111 0.029 Uiso 1 1 calc R . .

C3 C 0.50813(18) 0.56956(18) 0.57226(9) 0.0189(5) Uani 1 1 d . . .

H3 H 0.4332 0.5971 0.5636 0.023 Uiso 1 1 calc R . .

C21 C 0.89708(18) 0.62901(19) 0.45937(9) 0.0197(5) Uani 1 1 d . . .

H21A H 0.8349 0.6864 0.4550 0.029 Uiso 1 1 calc R . .

H21B H 0.9255 0.6243 0.4248 0.029 Uiso 1 1 calc R . .

H21C H 0.9567 0.6563 0.4892 0.029 Uiso 1 1 calc R . .

N7 N 0.65967(16) -0.10394(16) 0.66844(8) 0.0233(4) Uani 1 1 d . . .

C16 C 1.08503(18) 0.2623(2) 0.75250(9) 0.0226(5) Uani 1 1 d . . .

H16 H 1.0902 0.3279 0.7777 0.027 Uiso 1 1 calc R . .

C32 C 0.73243(18) -0.00765(19) 0.68165(9) 0.0203(5) Uani 1 1 d . . .

C10 C 0.37159(18) 0.4030(2) 0.63095(9) 0.0215(5) Uani 1 1 d . . .

H10 H 0.3345 0.4653 0.6081 0.026 Uiso 1 1 calc R . .

C35 C 0.5793(2) -0.1007(2) 0.62285(10) 0.0259(5) Uani 1 1 d . . .

H35 H 0.5296 -0.1673 0.6153 0.031 Uiso 1 1 calc R . .

C36 C 0.56640(19) -0.0056(2) 0.58716(10) 0.0243(5) Uani 1 1 d . . .

H36 H 0.5081 -0.0063 0.5556 0.029 Uiso 1 1 calc R . .

C18 C 1.12009(19) 0.0543(2) 0.73469(10) 0.0271(5) Uani 1 1 d . . .

H18 H 1.1475 -0.0228 0.7476 0.033 Uiso 1 1 calc R . .

C33 C 0.8172(2) -0.0122(2) 0.73383(9) 0.0266(5) Uani 1 1 d . . .

H33A H 0.8629 0.0611 0.7370 0.040 Uiso 1 1 calc R . .

H33B H 0.8650 -0.0831 0.7333 0.040 Uiso 1 1 calc R . .

H33C H 0.7794 -0.0176 0.7654 0.040 Uiso 1 1 calc R . .

C28 C 0.7463(2) -0.0567(2) 0.43513(10) 0.0293(6) Uani 1 1 d . . .

H28 H 0.7314 -0.1392 0.4261 0.035 Uiso 1 1 calc R . .

C29 C 0.7985(2) -0.0248(2) 0.48787(10) 0.0293(6) Uani 1 1 d . . .

H29 H 0.8201 -0.0857 0.5150 0.035 Uiso 1 1 calc R . .

C17 C 1.1257(2) 0.1497(2) 0.77100(10) 0.0283(5) Uani 1 1 d . . .

H17 H 1.1577 0.1384 0.8089 0.034 Uiso 1 1 calc R . .

C27 C 0.7159(2) 0.0315(2) 0.39565(10) 0.0282(5) Uani 1 1 d . . .

H27 H 0.6803 0.0098 0.3593 0.034 Uiso 1 1 calc R . .

C34 C 0.6730(2) -0.2132(2) 0.70310(11) 0.0335(6) Uani 1 1 d . . .

H34A H 0.6151 -0.2719 0.6881 0.050 Uiso 1 1 calc R . .

H34B H 0.6662 -0.1918 0.7409 0.050 Uiso 1 1 calc R . .

H34C H 0.7466 -0.2486 0.7034 0.050 Uiso 1 1 calc R . .

B1 B 0.8117(2) 0.5673(2) 0.56953(10) 0.0174(5) Uani 1 1 d . . .

H37 H 0.8263(16) 0.6638(17) 0.5575(8) 0.007(5) Uiso 1 1 d . . .


loop_

  _atom_site_aniso_label

  _atom_site_aniso_U_11

  _atom_site_aniso_U_22

  _atom_site_aniso_U_33

  _atom_site_aniso_U_23

  _atom_site_aniso_U_13

  _atom_site_aniso_U_12

Zn1 0.01771(13) 0.01363(12) 0.01721(13) 0.00260(10) 0.00339(9) -0.00056(10)

O2 0.0224(8) 0.0181(7) 0.0217(8) 0.0025(6) 0.0031(6) -0.0015(6)

N6 0.0189(9) 0.0141(9) 0.0170(9) 0.0011(7) 0.0024(7) -0.0012(7)

O1 0.0194(8) 0.0170(7) 0.0243(8) 0.0055(6) 0.0016(6) -0.0029(6)

C6 0.0176(11) 0.0201(11) 0.0186(11) -0.0017(9) 0.0044(8) -0.0007(9)

N4 0.0187(9) 0.0146(9) 0.0175(9) 0.0030(7) 0.0043(7) -0.0011(7)

N5 0.0174(9) 0.0131(8) 0.0166(9) 0.0009(7) 0.0034(7) -0.0014(7)

C24 0.0150(10) 0.0175(10) 0.0161(10) 0.0013(9) 0.0002(8) 0.0036(9)

N1 0.0205(9) 0.0131(8) 0.0160(9) 0.0008(7) 0.0040(7) 0.0007(7)

C20 0.0181(11) 0.0228(11) 0.0186(11) 0.0023(9) 0.0045(8) -0.0013(9)

N3 0.0187(9) 0.0132(8) 0.0173(9) 0.0017(7) 0.0036(7) -0.0015(7)

N2 0.0173(9) 0.0145(9) 0.0183(9) 0.0022(7) 0.0047(7) -0.0021(7)

C19 0.0231(12) 0.0190(11) 0.0293(13) 0.0003(10) 0.0074(10) -0.0006(9)

C25 0.0173(11) 0.0179(10) 0.0207(11) 0.0000(9) 0.0043(8) 0.0012(9)

C31 0.0181(11) 0.0152(10) 0.0239(12) 0.0000(9) 0.0072(9) 0.0010(9)

C7 0.0278(12) 0.0216(11) 0.0169(11) -0.0016(9) 0.0053(9) -0.0033(9)

C5 0.0176(11) 0.0193(11) 0.0135(11) -0.0053(8) 0.0024(8) -0.0023(9)

C11 0.0289(13) 0.0174(11) 0.0231(12) -0.0018(9) 0.0058(10) -0.0025(9)

C4 0.0196(11) 0.0154(10) 0.0139(10) -0.0038(8) 0.0022(8) -0.0010(8)

C15 0.0131(10) 0.0205(11) 0.0184(11) 0.0039(9) 0.0041(8) -0.0006(8)

C12 0.0197(11) 0.0178(11) 0.0173(11) -0.0028(9) 0.0072(8) -0.0017(9)

C14 0.0167(10) 0.0181(10) 0.0127(10) 0.0008(8) 0.0058(8) -0.0005(8)

C22 0.0144(10) 0.0203(11) 0.0168(11) 0.0055(9) 0.0020(8) 0.0033(8)

C23 0.0184(11) 0.0212(11) 0.0152(11) 0.0016(9) 0.0030(8) 0.0022(9)

C2 0.0213(11) 0.0148(10) 0.0159(11) -0.0023(8) 0.0003(8) 0.0002(9)

C26 0.0296(13) 0.0207(11) 0.0200(12) 0.0017(9) 0.0019(9) 0.0026(10)

C13 0.0186(11) 0.0212(11) 0.0157(11) -0.0020(9) 0.0013(8) -0.0027(9)

C30 0.0276(12) 0.0223(12) 0.0196(12) -0.0001(9) 0.0013(9) 0.0006(10)

C37 0.0213(11) 0.0199(11) 0.0190(11) 0.0001(9) 0.0093(9) 0.0008(9)

C9 0.0167(11) 0.0348(14) 0.0221(12) -0.0083(10) 0.0053(9) -0.0047(10)

C1 0.0262(12) 0.0206(11) 0.0234(12) 0.0046(9) 0.0036(9) 0.0038(9)

C8 0.0275(13) 0.0269(12) 0.0198(12) -0.0036(10) 0.0077(9) -0.0117(10)

C3 0.0196(11) 0.0173(11) 0.0191(11) -0.0003(9) 0.0020(9) 0.0024(9)

C21 0.0213(11) 0.0190(11) 0.0197(11) 0.0062(9) 0.0063(9) -0.0002(9)

N7 0.0281(11) 0.0160(9) 0.0286(11) 0.0041(8) 0.0128(8) -0.0008(8)

C16 0.0231(12) 0.0257(12) 0.0181(12) -0.0005(10) 0.0021(9) -0.0013(10)

C32 0.0190(11) 0.0196(11) 0.0244(12) 0.0025(9) 0.0092(9) 0.0009(9)

C10 0.0217(12) 0.0229(12) 0.0192(12) -0.0046(9) 0.0023(9) 0.0008(9)

C35 0.0286(13) 0.0197(11) 0.0316(14) -0.0041(10) 0.0117(10) -0.0070(10)

C36 0.0262(13) 0.0213(11) 0.0257(13) -0.0018(10) 0.0061(10) -0.0041(10)

C18 0.0238(12) 0.0244(12) 0.0321(14) 0.0097(10) 0.0023(10) 0.0014(10)

C33 0.0296(13) 0.0250(12) 0.0256(13) 0.0080(10) 0.0064(10) 0.0028(10)

C28 0.0353(14) 0.0172(11) 0.0351(15) -0.0056(10) 0.0062(11) -0.0005(10)

C29 0.0383(15) 0.0196(12) 0.0289(14) 0.0049(10) 0.0036(11) 0.0051(10)

C17 0.0302(13) 0.0308(13) 0.0212(12) 0.0075(10) -0.0019(10) 0.0006(11)

C27 0.0325(14) 0.0244(12) 0.0259(13) -0.0071(10) 0.0008(10) -0.0001(10)

C34 0.0380(15) 0.0215(13) 0.0447(16) 0.0117(11) 0.0177(12) -0.0001(11)

B1 0.0205(12) 0.0136(11) 0.0176(12) 0.0029(10) 0.0025(9) -0.0011(10)


_geom_special_details

;

  All esds (except the esd in the dihedral angle between two l.s. planes)

  are estimated using the full covariance matrix.  The cell esds are taken

  into account individually in the estimation of esds in distances, angles

  and torsion angles; correlations between esds in cell parameters are only

  used when they are defined by crystal symmetry.  An approximate (isotropic)

  treatment of cell esds is used for estimating esds involving l.s. planes.

;


loop_

  _geom_bond_atom_site_label_1

  _geom_bond_atom_site_label_2

  _geom_bond_distance

  _geom_bond_site_symmetry_2

  _geom_bond_publ_flag

Zn1 O1 1.9647(14) . ?

Zn1 O2 2.0506(15) . ?

Zn1 N2 2.0955(17) . ?

Zn1 N6 2.0955(17) . ?

Zn1 N4 2.1839(18) . ?

O2 C37 1.285(3) . ?

N6 C24 1.343(3) . ?

N6 N5 1.376(2) . ?

O1 C31 1.317(2) . ?

C6 C7 1.387(3) . ?

C6 C5 1.389(3) . ?

N4 C14 1.339(3) . ?

N4 N3 1.368(2) . ?

N5 C22 1.349(3) . ?

N5 B1 1.547(3) . ?

C24 C23 1.399(3) . ?

C24 C25 1.470(3) . ?

N1 C2 1.351(3) . ?

N1 N2 1.376(2) . ?

N1 B1 1.547(3) . ?

C20 C19 1.380(3) . ?

C20 C15 1.392(3) . ?

N3 C12 1.352(3) . ?

N3 B1 1.545(3) . ?

N2 C4 1.343(3) . ?

C19 C18 1.387(3) . ?

C25 C30 1.387(3) . ?

C25 C26 1.391(3) . ?

C31 C32 1.381(3) . ?

C31 C37 1.442(3) . ?

C7 C8 1.385(3) . ?

C5 C10 1.397(3) . ?

C5 C4 1.476(3) . ?

C11 C12 1.496(3) . ?

C4 C3 1.401(3) . ?

C15 C16 1.394(3) . ?

C15 C14 1.476(3) . ?

C12 C13 1.379(3) . ?

C14 C13 1.400(3) . ?

C22 C23 1.378(3) . ?

C22 C21 1.499(3) . ?

C2 C3 1.382(3) . ?

C2 C1 1.490(3) . ?

C26 C27 1.390(3) . ?

C30 C29 1.386(3) . ?

C37 C36 1.407(3) . ?

C9 C10 1.380(3) . ?

C9 C8 1.383(3) . ?

N7 C35 1.345(3) . ?

N7 C32 1.387(3) . ?

N7 C34 1.472(3) . ?

C16 C17 1.387(3) . ?

C32 C33 1.491(3) . ?

C35 C36 1.362(3) . ?

C18 C17 1.378(3) . ?

C28 C27 1.378(3) . ?

C28 C29 1.380(3) . ?


loop_

  _geom_angle_atom_site_label_1

  _geom_angle_atom_site_label_2

  _geom_angle_atom_site_label_3

  _geom_angle

  _geom_angle_site_symmetry_1

  _geom_angle_site_symmetry_3

  _geom_angle_publ_flag

O1 Zn1 O2 83.04(6) . . ?

O1 Zn1 N2 120.65(6) . . ?

O2 Zn1 N2 100.91(6) . . ?

O1 Zn1 N6 143.13(7) . . ?

O2 Zn1 N6 96.44(6) . . ?

N2 Zn1 N6 95.76(7) . . ?

O1 Zn1 N4 90.78(6) . . ?

O2 Zn1 N4 169.81(6) . . ?

N2 Zn1 N4 89.20(7) . . ?

N6 Zn1 N4 83.64(7) . . ?

C37 O2 Zn1 109.48(13) . . ?

C24 N6 N5 106.36(16) . . ?

C24 N6 Zn1 138.98(15) . . ?

N5 N6 Zn1 114.59(12) . . ?

C31 O1 Zn1 111.52(13) . . ?

C7 C6 C5 121.0(2) . . ?

C14 N4 N3 106.66(16) . . ?

C14 N4 Zn1 139.17(14) . . ?

N3 N4 Zn1 111.52(12) . . ?

C22 N5 N6 110.12(16) . . ?

C22 N5 B1 129.95(17) . . ?

N6 N5 B1 119.59(16) . . ?

N6 C24 C23 109.73(19) . . ?

N6 C24 C25 122.33(19) . . ?

C23 C24 C25 127.92(19) . . ?

C2 N1 N2 110.33(17) . . ?

C2 N1 B1 128.70(17) . . ?

N2 N1 B1 120.76(16) . . ?

C19 C20 C15 121.1(2) . . ?

C12 N3 N4 110.30(17) . . ?

C12 N3 B1 130.20(18) . . ?

N4 N3 B1 118.61(17) . . ?

C4 N2 N1 106.25(16) . . ?

C4 N2 Zn1 130.69(14) . . ?

N1 N2 Zn1 109.41(12) . . ?

C20 C19 C18 119.7(2) . . ?

C30 C25 C26 118.8(2) . . ?

C30 C25 C24 122.0(2) . . ?

C26 C25 C24 119.19(19) . . ?

O1 C31 C32 122.0(2) . . ?

O1 C31 C37 117.49(19) . . ?

C32 C31 C37 120.5(2) . . ?

C8 C7 C6 120.1(2) . . ?

C6 C5 C10 118.2(2) . . ?

C6 C5 C4 122.33(19) . . ?

C10 C5 C4 119.46(19) . . ?

N2 C4 C3 109.86(18) . . ?

N2 C4 C5 121.94(18) . . ?

C3 C4 C5 128.19(19) . . ?

C20 C15 C16 118.4(2) . . ?

C20 C15 C14 120.18(19) . . ?

C16 C15 C14 121.4(2) . . ?

N3 C12 C13 107.33(19) . . ?

N3 C12 C11 123.06(19) . . ?

C13 C12 C11 129.6(2) . . ?

N4 C14 C13 109.53(18) . . ?

N4 C14 C15 121.36(18) . . ?

C13 C14 C15 128.91(19) . . ?

N5 C22 C23 107.73(18) . . ?

N5 C22 C21 122.85(19) . . ?

C23 C22 C21 129.41(19) . . ?

C22 C23 C24 106.05(19) . . ?

N1 C2 C3 107.54(18) . . ?

N1 C2 C1 122.54(19) . . ?

C3 C2 C1 129.8(2) . . ?

C27 C26 C25 120.7(2) . . ?

C12 C13 C14 106.16(19) . . ?

C29 C30 C25 120.4(2) . . ?

O2 C37 C36 124.6(2) . . ?

O2 C37 C31 118.42(19) . . ?

C36 C37 C31 117.0(2) . . ?

C10 C9 C8 120.4(2) . . ?

C9 C8 C7 119.5(2) . . ?

C2 C3 C4 105.94(19) . . ?

C35 N7 C32 120.63(19) . . ?

C35 N7 C34 119.3(2) . . ?

C32 N7 C34 120.0(2) . . ?

C17 C16 C15 120.4(2) . . ?

C31 C32 N7 119.3(2) . . ?

C31 C32 C33 121.7(2) . . ?

N7 C32 C33 119.06(19) . . ?

C9 C10 C5 120.9(2) . . ?

N7 C35 C36 122.4(2) . . ?

C35 C36 C37 120.1(2) . . ?

C17 C18 C19 119.9(2) . . ?

C27 C28 C29 119.9(2) . . ?

C28 C29 C30 120.4(2) . . ?

C18 C17 C16 120.3(2) . . ?

C28 C27 C26 119.8(2) . . ?

N3 B1 N5 108.57(17) . . ?

N3 B1 N1 110.57(17) . . ?

N5 B1 N1 107.37(17) . . ?


_diffrn_measured_fraction_theta_max    0.994

_diffrn_reflns_theta_full              27.54

_diffrn_measured_fraction_theta_full   0.994

_refine_diff_density_max    0.408

_refine_diff_density_min   -0.426

_refine_diff_density_rms    0.067

#===END

# 2. TITLE AND AUTHOR LIST


  _publ_section_title

  ;

  Examination of Novel Zinc-Binding Groups for Use in Matrix
Metalloproteinase Inhibitors�

  ;


  loop

  _publ_author_name

  _publ_author_address

       'Cohen Seth M.'

;      Department of Chemistry and Biochemistry

        University of California, San Diego

        La Jolla

        CA 92093-0358

        USA

;

       'Puerta, David T.'

;      Department of Chemistry and Biochemistry

        University of California, San Diego

        La Jolla

        CA 92093-0358

        USA

;

#=========================================================================


data_[Zn(hydrotris(5,3-Methylphenylpyrazolyl)borate)(N-methyl-2,3-dihy 
droxypyridinone)]


_audit_creation_method            SHELXL-97

_chemical_name_systematic

;

  ?

;

_chemical_name_common             TpZn(N-methyl-2,3-dihydroxypyridinone)

_chemical_melting_point           ?

_chemical_formula_moiety          ?

_chemical_formula_sum

  'C42 H40 B N7 O2 Zn'

_chemical_formula_weight          750.99


loop_

  _atom_type_symbol

  _atom_type_description

  _atom_type_scat_dispersion_real

  _atom_type_scat_dispersion_imag

  _atom_type_scat_source

  'C'  'C'   0.0033   0.0016

  'International Tables Vol C Tables 4.2.6.8 and 6.1.1.4'

  'H'  'H'   0.0000   0.0000

  'International Tables Vol C Tables 4.2.6.8 and 6.1.1.4'

  'B'  'B'   0.0013   0.0007

  'International Tables Vol C Tables 4.2.6.8 and 6.1.1.4'

  'N'  'N'   0.0061   0.0033

  'International Tables Vol C Tables 4.2.6.8 and 6.1.1.4'

  'O'  'O'   0.0106   0.0060

  'International Tables Vol C Tables 4.2.6.8 and 6.1.1.4'

  'Zn'  'Zn'   0.2839   1.4301

  'International Tables Vol C Tables 4.2.6.8 and 6.1.1.4'


_symmetry_cell_setting            Monoclinic

_symmetry_space_group_name_H-M    P2(1)/c


loop_

  _symmetry_equiv_pos_as_xyz

  'x, y, z'

  '-x, y+1/2, -z+1/2'

  '-x, -y, -z'

  'x, -y-1/2, z-1/2'


_cell_length_a                    19.959(2)

_cell_length_b                    16.6518(19)

_cell_length_c                    10.9884(12)

_cell_angle_alpha                 90.00

_cell_angle_beta                  92.197(2)

_cell_angle_gamma                 90.00

_cell_volume                      3649.4(7)

_cell_formula_units_Z             4

_cell_measurement_temperature     100(2)

_cell_measurement_reflns_used     ?

_cell_measurement_theta_min       ?

_cell_measurement_theta_max       ?


_exptl_crystal_description        plate

_exptl_crystal_colour             colorless

_exptl_crystal_size_max           0.26

_exptl_crystal_size_mid           0.15

_exptl_crystal_size_min           0.06

_exptl_crystal_density_meas       0

_exptl_crystal_density_diffrn     1.367

_exptl_crystal_density_method     'not measured'

_exptl_crystal_F_000              1568

_exptl_absorpt_coefficient_mu     0.721

_exptl_absorpt_correction_type    none

_exptl_absorpt_correction_T_min   ?

_exptl_absorpt_correction_T_max   ?

_exptl_absorpt_process_details    ?


_exptl_special_details

;

  ?

;


_diffrn_ambient_temperature       100(2)

_diffrn_radiation_wavelength      0.71073

_diffrn_radiation_type            MoK\a

_diffrn_radiation_source          'fine-focus sealed tube'

_diffrn_radiation_monochromator   graphite

_diffrn_measurement_device_type   'CCD area detector'

_diffrn_measurement_method        'phi and omega scans'

_diffrn_detector_area_resol_mean  ?

_diffrn_standards_number          ?

_diffrn_standards_interval_count  ?

_diffrn_standards_interval_time   ?

_diffrn_standards_decay_%         ?

_diffrn_reflns_number             31063

_diffrn_reflns_av_R_equivalents   0.0540

_diffrn_reflns_av_sigmaI/netI     0.0507

_diffrn_reflns_limit_h_min        -25

_diffrn_reflns_limit_h_max        25

_diffrn_reflns_limit_k_min        -21

_diffrn_reflns_limit_k_max        21

_diffrn_reflns_limit_l_min        -14

_diffrn_reflns_limit_l_max        14

_diffrn_reflns_theta_min          1.59

_diffrn_reflns_theta_max          27.52

_reflns_number_total              8344

_reflns_number_gt                 6605

_reflns_threshold_expression      >2sigma(I)


_computing_data_collection        'Bruker SMART'

_computing_cell_refinement        'Bruker SMART'

_computing_data_reduction         'Bruker SAINT'

_computing_structure_solution     'SHELXS-97 (Sheldrick, 1990)'

_computing_structure_refinement   'SHELXL-97 (Sheldrick, 1997)'

_computing_molecular_graphics     'Bruker SHELXTL'

_computing_publication_material   'Bruker SHELXTL'


_refine_special_details

;

  Refinement of F^2^ against ALL reflections.  The weighted R-factor wR and

  goodness of fit S are based on F^2^, conventional R-factors R are based

  on F, with F set to zero for negative F^2^. The threshold expression of

  F^2^ > 2sigma(F^2^) is used only for calculating R-factors(gt) etc. and is

  not relevant to the choice of reflections for refinement.  R-factors based

  on F^2^ are statistically about twice as large as those based on F, and R-

  factors based on ALL data will be even larger.

;


_refine_ls_structure_factor_coef  Fsqd

_refine_ls_matrix_type            full

_refine_ls_weighting_scheme       calc

_refine_ls_weighting_details

  'calc w=1/[\s^2^(Fo^2^)+(0.0503P)^2^+0.0000P] where P=(Fo^2^+2Fc^2^)/3'

_atom_sites_solution_primary      direct

_atom_sites_solution_secondary    difmap

_atom_sites_solution_hydrogens    geom

_refine_ls_hydrogen_treatment     mixed

_refine_ls_extinction_method      none

_refine_ls_extinction_coef        ?

_refine_ls_number_reflns          8344

_refine_ls_number_parameters      486

_refine_ls_number_restraints      0

_refine_ls_R_factor_all           0.0481

_refine_ls_R_factor_gt            0.0374

_refine_ls_wR_factor_ref          0.0896

_refine_ls_wR_factor_gt           0.0866

_refine_ls_goodness_of_fit_ref    0.942

_refine_ls_restrained_S_all       0.942

_refine_ls_shift/su_max           0.102

_refine_ls_shift/su_mean          0.005


loop_

  _atom_site_label

  _atom_site_type_symbol

  _atom_site_fract_x

  _atom_site_fract_y

  _atom_site_fract_z

  _atom_site_U_iso_or_equiv

  _atom_site_adp_type

  _atom_site_occupancy

  _atom_site_symmetry_multiplicity

  _atom_site_calc_flag

  _atom_site_refinement_flags

  _atom_site_disorder_assembly

  _atom_site_disorder_group

Zn1 Zn 0.220182(10) 0.509708(11) 0.462309(18) 0.01423(7) Uani 1 1 d . . .

O1 O 0.28814(6) 0.48427(7) 0.58667(12) 0.0185(3) Uani 1 1 d . . .

N3 N 0.16836(7) 0.49144(8) 0.21438(13) 0.0149(3) Uani 1 1 d . . .

N4 N 0.22873(7) 0.50500(8) 0.27583(13) 0.0149(3) Uani 1 1 d . . .

O2 O 0.26161(6) 0.63033(7) 0.50185(11) 0.0174(3) Uani 1 1 d . . .

N1 N 0.08302(7) 0.53124(8) 0.36853(13) 0.0149(3) Uani 1 1 d . . .

C12 C 0.17699(9) 0.49414(10) 0.09244(16) 0.0173(4) Uani 1 1 d . . .

C24 C 0.16867(8) 0.32057(10) 0.50936(16) 0.0154(4) Uani 1 1 d . . .

C16 C 0.39344(10) 0.49478(11) 0.14157(17) 0.0227(4) Uani 1 1 d . . .

H16 H 0.3788 0.4619 0.0751 0.027 Uiso 1 1 calc R . .

C13 C 0.24352(9) 0.50916(10) 0.07438(16) 0.0184(4) Uani 1 1 d . . .

H13 H 0.2642 0.5144 -0.0016 0.022 Uiso 1 1 calc R . .

N6 N 0.16665(7) 0.39423(8) 0.46009(13) 0.0156(3) Uani 1 1 d . . .

C14 C 0.27472(9) 0.51516(10) 0.19008(16) 0.0165(4) Uani 1 1 d . . .

N2 N 0.12568(7) 0.56014(8) 0.45871(13) 0.0147(3) Uani 1 1 d . . .

C17 C 0.46095(10) 0.50889(12) 0.16284(19) 0.0288(5) Uani 1 1 d . . .

H17 H 0.4925 0.4855 0.1108 0.035 Uiso 1 1 calc R . .

C11 C 0.12090(10) 0.48360(12) -0.00010(17) 0.0247(4) Uani 1 1 d . . .

H11A H 0.0970 0.4336 0.0162 0.037 Uiso 1 1 calc R . .

H11B H 0.1391 0.4813 -0.0816 0.037 Uiso 1 1 calc R . .

H11C H 0.0899 0.5290 0.0044 0.037 Uiso 1 1 calc R . .

N5 N 0.12372(7) 0.38907(8) 0.35879(13) 0.0152(3) Uani 1 1 d . . .

C15 C 0.34640(9) 0.52879(10) 0.21753(16) 0.0166(4) Uani 1 1 d . . .

N7 N 0.32554(7) 0.68964(9) 0.65329(13) 0.0189(3) Uani 1 1 d . . .

C3 C 0.02772(9) 0.62586(10) 0.46320(16) 0.0176(4) Uani 1 1 d . . .

H3 H -0.0061 0.6623 0.4862 0.021 Uiso 1 1 calc R . .

C23 C 0.12829(9) 0.26792(10) 0.43897(16) 0.0168(4) Uani 1 1 d . . .

H23 H 0.1214 0.2123 0.4535 0.020 Uiso 1 1 calc R . .

C22 C 0.10076(8) 0.31279(10) 0.34494(16) 0.0152(4) Uani 1 1 d . . .

C2 C 0.02354(9) 0.57017(10) 0.37049(16) 0.0166(4) Uani 1 1 d . . .

C25 C 0.20779(9) 0.30180(10) 0.62227(16) 0.0164(4) Uani 1 1 d . . .

C30 C 0.21943(9) 0.35911(10) 0.71319(16) 0.0174(4) Uani 1 1 d . . .

H30 H 0.2006 0.4113 0.7043 0.021 Uiso 1 1 calc R . .

C29 C 0.25833(9) 0.34043(11) 0.81647(16) 0.0210(4) Uani 1 1 d . . .

H29 H 0.2668 0.3803 0.8770 0.025 Uiso 1 1 calc R . .

C5 C 0.12125(9) 0.66207(10) 0.62122(15) 0.0161(4) Uani 1 1 d . . .

C4 C 0.09175(9) 0.61764(10) 0.51626(15) 0.0157(4) Uani 1 1 d . . .

C6 C 0.15791(9) 0.62329(11) 0.71404(16) 0.0176(4) Uani 1 1 d . . .

H6 H 0.1649 0.5669 0.7097 0.021 Uiso 1 1 calc R . .

C32 C 0.34981(9) 0.54041(12) 0.75613(17) 0.0213(4) Uani 1 1 d . . .

H32 H 0.3587 0.4897 0.7928 0.026 Uiso 1 1 calc R . .

C26 C 0.23364(9) 0.22441(10) 0.64053(16) 0.0183(4) Uani 1 1 d . . .

H26 H 0.2250 0.1842 0.5807 0.022 Uiso 1 1 calc R . .

C34 C 0.36227(9) 0.68383(12) 0.76152(17) 0.0233(4) Uani 1 1 d . . .

H34 H 0.3793 0.7310 0.8001 0.028 Uiso 1 1 calc R . .

C31 C 0.31329(9) 0.54478(11) 0.64783(16) 0.0166(4) Uani 1 1 d . . .

C21 C 0.05296(9) 0.28806(11) 0.24422(16) 0.0202(4) Uani 1 1 d . . .

H21A H 0.0123 0.3208 0.2467 0.030 Uiso 1 1 calc R . .

H21B H 0.0413 0.2313 0.2539 0.030 Uiso 1 1 calc R . .

H21C H 0.0739 0.2958 0.1659 0.030 Uiso 1 1 calc R . .

C1 C -0.03396(9) 0.55158(11) 0.28457(17) 0.0223(4) Uani 1 1 d . . .

H1A H -0.0226 0.5669 0.2018 0.033 Uiso 1 1 calc R . .

H1B H -0.0736 0.5817 0.3085 0.033 Uiso 1 1 calc R . .

H1C H -0.0436 0.4939 0.2870 0.033 Uiso 1 1 calc R . .

C27 C 0.27169(9) 0.20578(11) 0.74479(17) 0.0213(4) Uani 1 1 d . . .

H27 H 0.2887 0.1529 0.7564 0.026 Uiso 1 1 calc R . .

C10 C 0.11083(9) 0.74479(11) 0.63016(17) 0.0210(4) Uani 1 1 d . . .

H10 H 0.0853 0.7720 0.5682 0.025 Uiso 1 1 calc R . .

C20 C 0.36943(9) 0.57663(11) 0.31414(16) 0.0200(4) Uani 1 1 d . . .

H20 H 0.3382 0.6000 0.3668 0.024 Uiso 1 1 calc R . .

C8 C 0.17421(10) 0.74842(12) 0.81998(17) 0.0242(4) Uani 1 1 d . . .

H8 H 0.1925 0.7778 0.8875 0.029 Uiso 1 1 calc R . .

C7 C 0.18428(9) 0.66625(11) 0.81280(17) 0.0223(4) Uani 1 1 d . . .

H7 H 0.2093 0.6393 0.8757 0.027 Uiso 1 1 calc R . .

B1 B 0.10570(10) 0.46400(12) 0.28320(18) 0.0157(4) Uani 1 1 d . . .

C28 C 0.28490(9) 0.26428(11) 0.83210(17) 0.0213(4) Uani 1 1 d . . .

H28 H 0.3121 0.2521 0.9025 0.026 Uiso 1 1 calc R . .

C9 C 0.13756(10) 0.78750(11) 0.72898(18) 0.0246(4) Uani 1 1 d . . .

H9 H 0.1306 0.8438 0.7340 0.029 Uiso 1 1 calc R . .

C19 C 0.43710(9) 0.59063(11) 0.33439(18) 0.0244(4) Uani 1 1 d . . .

H19 H 0.4521 0.6237 0.4004 0.029 Uiso 1 1 calc R . .

C35 C 0.31076(11) 0.76875(11) 0.59937(18) 0.0268(4) Uani 1 1 d . . .

H35A H 0.3165 0.7664 0.5113 0.040 Uiso 1 1 calc R . .

H35B H 0.3415 0.8088 0.6357 0.040 Uiso 1 1 calc R . .

H35C H 0.2644 0.7838 0.6152 0.040 Uiso 1 1 calc R . .

C33 C 0.37416(9) 0.61138(12) 0.81308(17) 0.0237(4) Uani 1 1 d . . .

H33 H 0.3991 0.6080 0.8883 0.028 Uiso 1 1 calc R . .

C18 C 0.48319(10) 0.55662(12) 0.25882(19) 0.0272(4) Uani 1 1 d . . .

H18 H 0.5298 0.5661 0.2729 0.033 Uiso 1 1 calc R . .

C37 C 0.41908(12) 0.36853(13) 0.4662(2) 0.0412(6) Uani 1 1 d . . .

H37 H 0.4024 0.4213 0.4519 0.049 Uiso 1 1 calc R . .

C42 C 0.39776(10) 0.32520(14) 0.5636(2) 0.0367(6) Uani 1 1 d . . .

H42 H 0.3664 0.3479 0.6167 0.044 Uiso 1 1 calc R . .

C41 C 0.42185(11) 0.24922(15) 0.5841(2) 0.0363(5) Uani 1 1 d . . .

H41 H 0.4074 0.2193 0.6519 0.044 Uiso 1 1 calc R . .

C38 C 0.46409(13) 0.33628(14) 0.3900(2) 0.0412(6) Uani 1 1 d . . .

H38 H 0.4793 0.3670 0.3236 0.049 Uiso 1 1 calc R . .

C40 C 0.46683(11) 0.21615(13) 0.5069(2) 0.0391(6) Uani 1 1 d . . .

H40 H 0.4836 0.1635 0.5213 0.047 Uiso 1 1 calc R . .

C39 C 0.48762(12) 0.25958(14) 0.4086(2) 0.0396(6) Uani 1 1 d . . .

H39 H 0.5180 0.2366 0.3540 0.048 Uiso 1 1 calc R . .

C36 C 0.29858(8) 0.62374(11) 0.59670(15) 0.0163(4) Uani 1 1 d . . .

H43 H 0.0654(8) 0.4514(10) 0.2183(15) 0.006(4) Uiso 1 1 d . . .


loop_

  _atom_site_aniso_label

  _atom_site_aniso_U_11

  _atom_site_aniso_U_22

  _atom_site_aniso_U_33

  _atom_site_aniso_U_23

  _atom_site_aniso_U_13

  _atom_site_aniso_U_12

Zn1 0.01660(11) 0.01423(11) 0.01169(11) -0.00093(8) -0.00149(8) 0.00056(8)

O1 0.0206(7) 0.0162(6) 0.0182(6) 0.0009(5) -0.0050(5) 0.0002(5)

N3 0.0172(8) 0.0148(7) 0.0125(7) -0.0009(6) -0.0024(6) -0.0005(6)

N4 0.0171(8) 0.0133(7) 0.0142(7) -0.0005(6) -0.0008(6) -0.0002(6)

O2 0.0203(6) 0.0178(6) 0.0138(6) -0.0001(5) -0.0017(5) -0.0001(5)

N1 0.0165(8) 0.0154(7) 0.0126(7) -0.0010(6) -0.0023(6) -0.0008(6)

C12 0.0260(10) 0.0129(9) 0.0127(8) -0.0008(7) -0.0015(7) 0.0010(7)

C24 0.0171(9) 0.0138(8) 0.0156(9) 0.0000(7) 0.0041(7) 0.0012(7)

C16 0.0254(10) 0.0242(10) 0.0187(9) -0.0047(8) 0.0021(8) 0.0007(8)

C13 0.0256(10) 0.0168(9) 0.0128(8) -0.0007(7) 0.0010(7) 0.0002(7)

N6 0.0169(8) 0.0165(7) 0.0131(7) 0.0001(6) -0.0018(6) 0.0002(6)

C14 0.0233(9) 0.0116(8) 0.0146(8) -0.0010(7) 0.0011(7) 0.0014(7)

N2 0.0178(8) 0.0134(7) 0.0128(7) -0.0015(6) -0.0019(6) -0.0003(6)

C17 0.0253(11) 0.0316(11) 0.0299(11) -0.0050(9) 0.0077(9) 0.0023(9)

C11 0.0288(11) 0.0298(11) 0.0150(9) 0.0001(8) -0.0044(8) -0.0036(8)

N5 0.0176(8) 0.0160(7) 0.0117(7) -0.0016(6) -0.0023(6) -0.0010(6)

C15 0.0220(9) 0.0126(9) 0.0152(9) 0.0039(7) 0.0012(7) 0.0011(7)

N7 0.0219(8) 0.0177(8) 0.0170(8) -0.0018(6) 0.0001(6) -0.0023(6)

C3 0.0191(9) 0.0163(9) 0.0173(9) 0.0001(7) 0.0017(7) 0.0017(7)

C23 0.0192(9) 0.0129(9) 0.0185(9) -0.0014(7) 0.0036(7) -0.0002(7)

C22 0.0162(9) 0.0146(8) 0.0154(9) -0.0040(7) 0.0052(7) -0.0011(7)

C2 0.0170(9) 0.0155(9) 0.0173(9) 0.0043(7) 0.0012(7) 0.0006(7)

C25 0.0171(9) 0.0163(9) 0.0159(9) 0.0029(7) 0.0032(7) -0.0013(7)

C30 0.0199(9) 0.0148(9) 0.0177(9) 0.0028(7) 0.0033(7) 0.0002(7)

C29 0.0237(10) 0.0242(10) 0.0154(9) 0.0002(7) 0.0025(8) -0.0035(8)

C5 0.0168(9) 0.0176(9) 0.0140(9) -0.0025(7) 0.0032(7) -0.0013(7)

C4 0.0205(9) 0.0125(8) 0.0143(8) 0.0024(7) 0.0022(7) -0.0002(7)

C6 0.0202(9) 0.0162(9) 0.0166(9) -0.0020(7) 0.0026(7) -0.0002(7)

C32 0.0203(10) 0.0251(10) 0.0184(9) 0.0025(8) -0.0014(8) 0.0024(8)

C26 0.0214(9) 0.0157(9) 0.0180(9) 0.0006(7) 0.0035(7) 0.0005(7)

C34 0.0233(10) 0.0293(11) 0.0172(10) -0.0071(8) -0.0018(8) -0.0061(8)

C31 0.0150(9) 0.0196(9) 0.0153(9) 0.0001(7) 0.0013(7) 0.0001(7)

C21 0.0227(10) 0.0176(9) 0.0203(10) -0.0043(7) -0.0007(8) -0.0031(7)

C1 0.0199(10) 0.0230(10) 0.0237(10) -0.0012(8) -0.0041(8) 0.0020(8)

C27 0.0239(10) 0.0184(9) 0.0219(10) 0.0068(8) 0.0046(8) 0.0039(7)

C10 0.0240(10) 0.0190(9) 0.0200(10) -0.0004(7) 0.0018(8) 0.0026(7)

C20 0.0235(10) 0.0205(9) 0.0162(9) -0.0011(7) 0.0014(7) 0.0010(7)

C8 0.0275(11) 0.0273(11) 0.0181(10) -0.0109(8) 0.0030(8) -0.0048(8)

C7 0.0233(10) 0.0277(11) 0.0159(9) -0.0012(8) 0.0001(8) -0.0013(8)

B1 0.0183(10) 0.0137(10) 0.0148(10) -0.0017(8) -0.0015(8) -0.0008(8)

C28 0.0208(10) 0.0270(10) 0.0161(9) 0.0075(8) 0.0003(7) 0.0003(8)

C9 0.0304(11) 0.0172(9) 0.0265(11) -0.0068(8) 0.0066(9) 0.0002(8)

C19 0.0250(10) 0.0253(10) 0.0228(10) -0.0034(8) -0.0009(8) -0.0038(8)

C35 0.0384(12) 0.0168(10) 0.0251(11) -0.0028(8) -0.0002(9) -0.0029(8)

C33 0.0208(10) 0.0341(11) 0.0157(9) -0.0031(8) -0.0043(8) -0.0007(8)

C18 0.0195(10) 0.0290(11) 0.0328(12) -0.0003(9) 0.0005(9) -0.0012(8)

C37 0.0437(14) 0.0232(11) 0.0545(16) -0.0047(11) -0.0272(12) 0.0001(10)

C42 0.0225(11) 0.0505(15) 0.0366(13) -0.0232(11) -0.0054(9) -0.0002(10)

C41 0.0285(12) 0.0569(15) 0.0230(11) 0.0126(10) -0.0032(9) -0.0077(11)

C38 0.0599(16) 0.0417(14) 0.0213(11) 0.0086(10) -0.0062(11) -0.0220(12)

C40 0.0283(12) 0.0285(12) 0.0602(17) 0.0117(11) -0.0010(11) 0.0059(9)

C39 0.0383(13) 0.0431(14) 0.0385(14) -0.0128(11) 0.0149(11) -0.0067(11)

C36 0.0149(9) 0.0203(9) 0.0139(9) -0.0034(7) 0.0025(7) -0.0007(7)


_geom_special_details

;

  All esds (except the esd in the dihedral angle between two l.s. planes)

  are estimated using the full covariance matrix.  The cell esds are taken

  into account individually in the estimation of esds in distances, angles

  and torsion angles; correlations between esds in cell parameters are only

  used when they are defined by crystal symmetry.  An approximate (isotropic)

  treatment of cell esds is used for estimating esds involving l.s. planes.

;


loop_

  _geom_bond_atom_site_label_1

  _geom_bond_atom_site_label_2

  _geom_bond_distance

  _geom_bond_site_symmetry_2

  _geom_bond_publ_flag

Zn1 O1 1.9350(12) . ?

Zn1 N2 2.0638(14) . ?

Zn1 N4 2.0642(15) . ?

Zn1 N6 2.1996(14) . ?

Zn1 O2 2.2088(12) . ?

O1 C31 1.301(2) . ?

N3 C12 1.358(2) . ?

N3 N4 1.377(2) . ?

N3 B1 1.555(2) . ?

N4 C14 1.351(2) . ?

O2 C36 1.259(2) . ?

N1 C2 1.354(2) . ?

N1 N2 1.3688(19) . ?

N1 B1 1.540(2) . ?

C12 C13 1.373(3) . ?

C12 C11 1.494(3) . ?

C24 N6 1.341(2) . ?

C24 C23 1.403(2) . ?

C24 C25 1.474(2) . ?

C16 C17 1.379(3) . ?

C16 C15 1.400(2) . ?

C13 C14 1.398(2) . ?

N6 N5 1.3811(19) . ?

C14 C15 1.468(3) . ?

N2 C4 1.345(2) . ?

C17 C18 1.380(3) . ?

N5 C22 1.357(2) . ?

N5 B1 1.534(2) . ?

C15 C20 1.391(2) . ?

N7 C36 1.362(2) . ?

N7 C34 1.376(2) . ?

N7 C35 1.470(2) . ?

C3 C2 1.378(2) . ?

C3 C4 1.391(2) . ?

C23 C22 1.373(2) . ?

C22 C21 1.491(2) . ?

C2 C1 1.490(2) . ?

C25 C30 1.395(2) . ?

C25 C26 1.400(2) . ?

C30 C29 1.386(2) . ?

C29 C28 1.383(3) . ?

C5 C6 1.391(2) . ?

C5 C10 1.397(2) . ?

C5 C4 1.474(2) . ?

C6 C7 1.387(2) . ?

C32 C31 1.373(2) . ?

C32 C33 1.415(3) . ?

C26 C27 1.385(3) . ?

C34 C33 1.350(3) . ?

C31 C36 1.455(2) . ?

C27 C28 1.386(3) . ?

C10 C9 1.388(3) . ?

C20 C19 1.380(3) . ?

C8 C9 1.379(3) . ?

C8 C7 1.386(3) . ?

C19 C18 1.384(3) . ?

C37 C38 1.362(3) . ?

C37 C42 1.372(3) . ?

C42 C41 1.369(3) . ?

C41 C40 1.374(3) . ?

C38 C39 1.373(3) . ?

C40 C39 1.377(3) . ?


loop_

  _geom_angle_atom_site_label_1

  _geom_angle_atom_site_label_2

  _geom_angle_atom_site_label_3

  _geom_angle

  _geom_angle_site_symmetry_1

  _geom_angle_site_symmetry_3

  _geom_angle_publ_flag

O1 Zn1 N2 135.89(6) . . ?

O1 Zn1 N4 127.62(6) . . ?

N2 Zn1 N4 96.12(6) . . ?

O1 Zn1 N6 98.25(5) . . ?

N2 Zn1 N6 84.97(5) . . ?

N4 Zn1 N6 90.82(5) . . ?

O1 Zn1 O2 79.23(5) . . ?

N2 Zn1 O2 88.21(5) . . ?

N4 Zn1 O2 100.68(5) . . ?

N6 Zn1 O2 167.20(5) . . ?

C31 O1 Zn1 116.19(11) . . ?

C12 N3 N4 109.68(14) . . ?

C12 N3 B1 128.62(15) . . ?

N4 N3 B1 120.98(14) . . ?

C14 N4 N3 106.48(14) . . ?

C14 N4 Zn1 140.51(12) . . ?

N3 N4 Zn1 112.89(11) . . ?

C36 O2 Zn1 106.66(11) . . ?

C2 N1 N2 109.98(14) . . ?

C2 N1 B1 129.53(15) . . ?

N2 N1 B1 120.49(14) . . ?

N3 C12 C13 107.96(16) . . ?

N3 C12 C11 123.22(17) . . ?

C13 C12 C11 128.81(17) . . ?

N6 C24 C23 109.95(15) . . ?

N6 C24 C25 122.73(15) . . ?

C23 C24 C25 127.31(16) . . ?

C17 C16 C15 120.24(18) . . ?

C12 C13 C14 106.33(16) . . ?

C24 N6 N5 106.07(13) . . ?

C24 N6 Zn1 142.02(12) . . ?

N5 N6 Zn1 110.45(10) . . ?

N4 C14 C13 109.55(16) . . ?

N4 C14 C15 123.97(16) . . ?

C13 C14 C15 126.47(16) . . ?

C4 N2 N1 106.28(14) . . ?

C4 N2 Zn1 139.22(12) . . ?

N1 N2 Zn1 114.42(10) . . ?

C16 C17 C18 120.74(19) . . ?

C22 N5 N6 110.18(14) . . ?

C22 N5 B1 129.01(15) . . ?

N6 N5 B1 120.74(14) . . ?

C20 C15 C16 118.49(17) . . ?

C20 C15 C14 122.41(16) . . ?

C16 C15 C14 119.05(16) . . ?

C36 N7 C34 121.72(16) . . ?

C36 N7 C35 117.94(15) . . ?

C34 N7 C35 120.23(15) . . ?

C2 C3 C4 105.81(16) . . ?

C22 C23 C24 106.25(15) . . ?

N5 C22 C23 107.54(15) . . ?

N5 C22 C21 123.06(16) . . ?

C23 C22 C21 129.38(16) . . ?

N1 C2 C3 107.80(15) . . ?

N1 C2 C1 123.03(16) . . ?

C3 C2 C1 129.17(16) . . ?

C30 C25 C26 118.48(16) . . ?

C30 C25 C24 121.75(16) . . ?

C26 C25 C24 119.76(16) . . ?

C29 C30 C25 120.39(16) . . ?

C28 C29 C30 120.52(17) . . ?

C6 C5 C10 118.80(16) . . ?

C6 C5 C4 121.59(16) . . ?

C10 C5 C4 119.59(16) . . ?

N2 C4 C3 110.13(15) . . ?

N2 C4 C5 122.15(15) . . ?

C3 C4 C5 127.72(16) . . ?

C7 C6 C5 120.49(17) . . ?

C31 C32 C33 120.06(18) . . ?

C27 C26 C25 120.81(17) . . ?

C33 C34 N7 120.31(17) . . ?

O1 C31 C32 126.01(17) . . ?

O1 C31 C36 115.60(15) . . ?

C32 C31 C36 118.35(16) . . ?

C26 C27 C28 119.93(17) . . ?

C9 C10 C5 120.43(18) . . ?

C19 C20 C15 120.83(17) . . ?

C9 C8 C7 119.91(17) . . ?

C8 C7 C6 120.17(18) . . ?

N5 B1 N1 109.28(15) . . ?

N5 B1 N3 109.03(14) . . ?

N1 B1 N3 110.07(14) . . ?

C29 C28 C27 119.80(18) . . ?

C8 C9 C10 120.19(17) . . ?

C20 C19 C18 120.20(18) . . ?

C34 C33 C32 120.60(17) . . ?

C17 C18 C19 119.50(18) . . ?

C38 C37 C42 120.3(2) . . ?

C41 C42 C37 119.8(2) . . ?

C42 C41 C40 120.2(2) . . ?

C37 C38 C39 120.3(2) . . ?

C41 C40 C39 119.8(2) . . ?

C38 C39 C40 119.6(2) . . ?

O2 C36 N7 121.11(16) . . ?

O2 C36 C31 120.11(15) . . ?

N7 C36 C31 118.78(15) . . ?


_diffrn_measured_fraction_theta_max    0.994

_diffrn_reflns_theta_full              27.52

_diffrn_measured_fraction_theta_full   0.994

_refine_diff_density_max    0.767

_refine_diff_density_min   -0.484

_refine_diff_density_rms    0.067

#===END

# 2. TITLE AND AUTHOR LIST


  _publ_section_title

  ;

  Examination of Novel Zinc-Binding Groups for Use in Matrix
Metalloproteinase Inhibitors

  ;


  loop

  _publ_author_name

  _publ_author_address

       'Cohen Seth M.'

;      Department of Chemistry and Biochemistry

        University of California, San Diego

        La Jolla

        CA 92093-0358

        USA

;

       'Puerta, David T.'

;      Department of Chemistry and Biochemistry

        University of California, San Diego

        La Jolla

        CA 92093-0358

        USA

;

#=========================================================================


Data
[Zn(hydrotris(5,3-Methylphenylpyrazolyl)borate)(2-hydroxypyridine-N-oxide)]


_audit_creation_method            SHELXL-97

_chemical_name_systematic

;

  ?

;

_chemical_name_common             TpZn(2-hydroxypyridine-N-oxide)

_chemical_melting_point           ?

_chemical_formula_moiety          ?

_chemical_formula_sum

  'C35 H32 B N7 O2 Zn'

_chemical_formula_weight          658.86


loop_

  _atom_type_symbol

  _atom_type_description

  _atom_type_scat_dispersion_real

  _atom_type_scat_dispersion_imag

  _atom_type_scat_source

  'C'  'C'   0.0033   0.0016

  'International Tables Vol C Tables 4.2.6.8 and 6.1.1.4'

  'H'  'H'   0.0000   0.0000

  'International Tables Vol C Tables 4.2.6.8 and 6.1.1.4'

  'B'  'B'   0.0013   0.0007

  'International Tables Vol C Tables 4.2.6.8 and 6.1.1.4'

  'N'  'N'   0.0061   0.0033

  'International Tables Vol C Tables 4.2.6.8 and 6.1.1.4'

  'O'  'O'   0.0106   0.0060

  'International Tables Vol C Tables 4.2.6.8 and 6.1.1.4'

  'Zn'  'Zn'   0.2839   1.4301

  'International Tables Vol C Tables 4.2.6.8 and 6.1.1.4'


_symmetry_cell_setting            Monoclinic

_symmetry_space_group_name_H-M    P2(1)/c


loop_

  _symmetry_equiv_pos_as_xyz

  'x, y, z'

  '-x, y+1/2, -z+1/2'

  '-x, -y, -z'

  'x, -y-1/2, z-1/2'


_cell_length_a                    9.7863(15)

_cell_length_b                    23.269(4)

_cell_length_c                    13.607(2)

_cell_angle_alpha                 90.00

_cell_angle_beta                  98.122(3)

_cell_angle_gamma                 90.00

_cell_volume                      3067.5(8)

_cell_formula_units_Z             4

_cell_measurement_temperature     100(2)

_cell_measurement_reflns_used     ?

_cell_measurement_theta_min       ?

_cell_measurement_theta_max       ?


_exptl_crystal_description        spindle

_exptl_crystal_colour             colorless

_exptl_crystal_size_max           .07

_exptl_crystal_size_mid           .07

_exptl_crystal_size_min           .2

_exptl_crystal_density_meas       ?

_exptl_crystal_density_diffrn     1.427

_exptl_crystal_density_method     'not measured'

_exptl_crystal_F_000              1368

_exptl_absorpt_coefficient_mu     0.846

_exptl_absorpt_correction_type    none

_exptl_absorpt_correction_T_min   ?

_exptl_absorpt_correction_T_max   ?

_exptl_absorpt_process_details    ?


_exptl_special_details

;

  ?

;


_diffrn_ambient_temperature       100(2)

_diffrn_radiation_wavelength      0.71073

_diffrn_radiation_type            MoK\a

_diffrn_radiation_source          'fine-focus sealed tube'

_diffrn_radiation_monochromator   graphite

_diffrn_measurement_device_type   'CCD area detector'

_diffrn_measurement_method        'phi and omega scans'

_diffrn_detector_area_resol_mean  ?

_diffrn_standards_number          ?

_diffrn_standards_interval_count  ?

_diffrn_standards_interval_time   ?

_diffrn_standards_decay_%         ?

_diffrn_reflns_number             26190

_diffrn_reflns_av_R_equivalents   0.0620

_diffrn_reflns_av_sigmaI/netI     0.0903

_diffrn_reflns_limit_h_min        -12

_diffrn_reflns_limit_h_max        12

_diffrn_reflns_limit_k_min        -29

_diffrn_reflns_limit_k_max        29

_diffrn_reflns_limit_l_min        -17

_diffrn_reflns_limit_l_max        17

_diffrn_reflns_theta_min          1.75

_diffrn_reflns_theta_max          27.59

_reflns_number_total              7029

_reflns_number_gt                 4568

_reflns_threshold_expression      >2sigma(I)


_computing_data_collection        'Bruker SMART'

_computing_cell_refinement        'Bruker SMART'

_computing_data_reduction         'Bruker SHELXTL'

_computing_structure_solution     'SHELXS-97 (Sheldrick, 1990)'

_computing_structure_refinement   'SHELXL-97 (Sheldrick, 1997)'

_computing_molecular_graphics     'Bruker SHELXTL'

_computing_publication_material   'Bruker SHELXTL'


_refine_special_details

;

  Refinement of F^2^ against ALL reflections.  The weighted R-factor wR and

  goodness of fit S are based on F^2^, conventional R-factors R are based

  on F, with F set to zero for negative F^2^. The threshold expression of

  F^2^ > 2sigma(F^2^) is used only for calculating R-factors(gt) etc. and is

  not relevant to the choice of reflections for refinement.  R-factors based

  on F^2^ are statistically about twice as large as those based on F, and R-

  factors based on ALL data will be even larger.

;


_refine_ls_structure_factor_coef  Fsqd

_refine_ls_matrix_type            full

_refine_ls_weighting_scheme       calc

_refine_ls_weighting_details

  'calc w=1/[\s^2^(Fo^2^)+(0.0342P)^2^+0.0000P] where P=(Fo^2^+2Fc^2^)/3'

_atom_sites_solution_primary      direct

_atom_sites_solution_secondary    difmap

_atom_sites_solution_hydrogens    geom

_refine_ls_hydrogen_treatment     mixed

_refine_ls_extinction_method      none

_refine_ls_extinction_coef        ?

_refine_ls_number_reflns          7029

_refine_ls_number_parameters      422

_refine_ls_number_restraints      0

_refine_ls_R_factor_all           0.0780

_refine_ls_R_factor_gt            0.0434

_refine_ls_wR_factor_ref          0.0867

_refine_ls_wR_factor_gt           0.0800

_refine_ls_goodness_of_fit_ref    0.879

_refine_ls_restrained_S_all       0.879

_refine_ls_shift/su_max           0.989

_refine_ls_shift/su_mean          0.074


loop_

  _atom_site_label

  _atom_site_type_symbol

  _atom_site_fract_x

  _atom_site_fract_y

  _atom_site_fract_z

  _atom_site_U_iso_or_equiv

  _atom_site_adp_type

  _atom_site_occupancy

  _atom_site_symmetry_multiplicity

  _atom_site_calc_flag

  _atom_site_refinement_flags

  _atom_site_disorder_assembly

  _atom_site_disorder_group

Zn1 Zn 0.19129(3) 0.622425(12) 0.83821(2) 0.01837(9) Uani 1 1 d . . .

O1 O 0.13382(17) 0.62518(8) 0.69382(12) 0.0225(4) Uani 1 1 d . . .

N2 N 0.2552(2) 0.55757(8) 0.93452(15) 0.0184(5) Uani 1 1 d . . .

C6 C 0.1092(3) 0.47908(11) 0.7789(2) 0.0222(6) Uani 1 1 d . . .

H6 H 0.1703 0.5050 0.7533 0.027 Uiso 1 1 calc R . .

O2 O -0.01958(18) 0.60451(7) 0.83044(13) 0.0219(4) Uani 1 1 d . . .

N3 N 0.4849(2) 0.64339(8) 0.91831(15) 0.0192(5) Uani 1 1 d . . .

N5 N 0.3058(2) 0.67882(9) 1.01890(15) 0.0191(5) Uani 1 1 d . . .

N1 N 0.3554(2) 0.57243(9) 1.01155(15) 0.0181(5) Uani 1 1 d . . .

C18 C 0.4095(3) 0.62383(14) 0.4476(2) 0.0361(7) Uani 1 1 d . . .

H18 H 0.3898 0.6188 0.3777 0.043 Uiso 1 1 calc R . .

N6 N 0.2099(2) 0.68903(9) 0.93747(15) 0.0188(5) Uani 1 1 d . . .

N4 N 0.4133(2) 0.63309(8) 0.82629(15) 0.0187(5) Uani 1 1 d . . .

C14 C 0.4994(3) 0.64715(10) 0.76074(19) 0.0194(6) Uani 1 1 d . . .

C35 C -0.0698(2) 0.59199(10) 0.74058(18) 0.0146(5) Uani 1 1 d . . .

C29 C -0.0942(3) 0.77388(11) 0.7232(2) 0.0251(6) Uani 1 1 d . . .

H29 H -0.0991 0.7676 0.6538 0.030 Uiso 1 1 calc R . .

C15 C 0.4653(3) 0.63889(11) 0.65308(19) 0.0201(6) Uani 1 1 d . . .

C12 C 0.6129(3) 0.66400(10) 0.9107(2) 0.0201(6) Uani 1 1 d . . .

C10 C 0.0270(3) 0.43332(11) 0.9170(2) 0.0240(6) Uani 1 1 d . . .

H10 H 0.0307 0.4280 0.9866 0.029 Uiso 1 1 calc R . .

C22 C 0.2879(3) 0.71660(11) 1.09221(19) 0.0196(6) Uani 1 1 d . . .

C3 C 0.2938(3) 0.48334(11) 1.03867(19) 0.0210(6) Uani 1 1 d . . .

H3 H 0.2873 0.4464 1.0676 0.025 Uiso 1 1 calc R . .

C5 C 0.1165(3) 0.47211(10) 0.88105(19) 0.0189(6) Uani 1 1 d . . .

C2 C 0.3799(3) 0.52754(11) 1.07562(19) 0.0207(6) Uani 1 1 d . . .

C23 C 0.1800(3) 0.75212(11) 1.05672(19) 0.0218(6) Uani 1 1 d . . .

H23 H 0.1443 0.7829 1.0913 0.026 Uiso 1 1 calc R . .

C4 C 0.2184(3) 0.50313(10) 0.95095(19) 0.0189(6) Uani 1 1 d . . .

C30 C 0.0126(3) 0.75008(11) 0.7873(2) 0.0222(6) Uani 1 1 d . . .

H30 H 0.0812 0.7280 0.7616 0.027 Uiso 1 1 calc R . .

C24 C 0.1335(3) 0.73420(10) 0.96024(19) 0.0192(6) Uani 1 1 d . . .

C25 C 0.0211(3) 0.75805(10) 0.88956(19) 0.0195(6) Uani 1 1 d . . .

N7 N 0.0096(2) 0.60296(9) 0.66748(17) 0.0261(5) Uani 1 1 d . . .

C32 C -0.1642(3) 0.56642(12) 0.5430(2) 0.0292(7) Uani 1 1 d . . .

H32 H -0.1963 0.5580 0.4753 0.035 Uiso 1 1 calc R . .

C1 C 0.4815(3) 0.52960(11) 1.16753(19) 0.0258(6) Uani 1 1 d . . .

H1A H 0.5693 0.5449 1.1520 0.039 Uiso 1 1 calc R . .

H1B H 0.4960 0.4907 1.1948 0.039 Uiso 1 1 calc R . .

H1C H 0.4464 0.5545 1.2164 0.039 Uiso 1 1 calc R . .

C11 C 0.7172(3) 0.67757(11) 0.9980(2) 0.0252(6) Uani 1 1 d . . .

H11A H 0.6868 0.7111 1.0327 0.038 Uiso 1 1 calc R . .

H11B H 0.8060 0.6860 0.9757 0.038 Uiso 1 1 calc R . .

H11C H 0.7275 0.6446 1.0432 0.038 Uiso 1 1 calc R . .

C13 C 0.6241(3) 0.66717(10) 0.81160(19) 0.0210(6) Uani 1 1 d . . .

H13 H 0.7015 0.6804 0.7831 0.025 Uiso 1 1 calc R . .

C8 C -0.0739(3) 0.41020(11) 0.7509(2) 0.0282(7) Uani 1 1 d . . .

H8 H -0.1388 0.3891 0.7063 0.034 Uiso 1 1 calc R . .

C31 C -0.0367(3) 0.58930(11) 0.5699(2) 0.0250(6) Uani 1 1 d . . .

H31 H 0.0214 0.5960 0.5207 0.030 Uiso 1 1 calc R . .

C28 C -0.1942(3) 0.80679(11) 0.7589(2) 0.0262(7) Uani 1 1 d . . .

H28 H -0.2676 0.8231 0.7145 0.031 Uiso 1 1 calc R . .

C33 C -0.2473(3) 0.55552(12) 0.6160(2) 0.0284(7) Uani 1 1 d . . .

H33 H -0.3368 0.5396 0.5986 0.034 Uiso 1 1 calc R . .

C34 C -0.1991(3) 0.56793(11) 0.7125(2) 0.0244(6) Uani 1 1 d . . .

H34 H -0.2557 0.5599 0.7621 0.029 Uiso 1 1 calc R . .

C26 C -0.0802(3) 0.79150(11) 0.9246(2) 0.0241(6) Uani 1 1 d . . .

H26 H -0.0762 0.7978 0.9940 0.029 Uiso 1 1 calc R . .

C21 C 0.3697(3) 0.71371(11) 1.19387(19) 0.0251(6) Uani 1 1 d . . .

H21A H 0.3459 0.6785 1.2271 0.038 Uiso 1 1 calc R . .

H21B H 0.3481 0.7472 1.2326 0.038 Uiso 1 1 calc R . .

H21C H 0.4684 0.7136 1.1883 0.038 Uiso 1 1 calc R . .

C16 C 0.5214(3) 0.67579(12) 0.5886(2) 0.0255(6) Uani 1 1 d . . .

H16 H 0.5803 0.7062 0.6150 0.031 Uiso 1 1 calc R . .

C19 C 0.3557(3) 0.58646(13) 0.5106(2) 0.0314(7) Uani 1 1 d . . .

H19 H 0.2994 0.5554 0.4839 0.038 Uiso 1 1 calc R . .

C7 C 0.0145(3) 0.44873(11) 0.7146(2) 0.0248(6) Uani 1 1 d . . .

H7 H 0.0097 0.4543 0.6450 0.030 Uiso 1 1 calc R . .

B1 B 0.4192(3) 0.63296(12) 1.0144(2) 0.0198(7) Uani 1 1 d . . .

C20 C 0.3830(3) 0.59374(11) 0.6125(2) 0.0246(6) Uani 1 1 d . . .

H20 H 0.3451 0.5676 0.6551 0.030 Uiso 1 1 calc R . .

C9 C -0.0674(3) 0.40249(11) 0.8519(2) 0.0281(7) Uani 1 1 d . . .

H9 H -0.1278 0.3760 0.8769 0.034 Uiso 1 1 calc R . .

C27 C -0.1858(3) 0.81553(11) 0.8598(2) 0.0276(7) Uani 1 1 d . . .

H27 H -0.2535 0.8383 0.8850 0.033 Uiso 1 1 calc R . .

C17 C 0.4925(3) 0.66884(13) 0.4868(2) 0.0324(7) Uani 1 1 d . . .

H17 H 0.5296 0.6949 0.4438 0.039 Uiso 1 1 calc R . .

H35 H 0.494(2) 0.6375(9) 1.0771(16) 0.007(6) Uiso 1 1 d . . .


loop_

  _atom_site_aniso_label

  _atom_site_aniso_U_11

  _atom_site_aniso_U_22

  _atom_site_aniso_U_33

  _atom_site_aniso_U_23

  _atom_site_aniso_U_13

  _atom_site_aniso_U_12

Zn1 0.02129(16) 0.01460(15) 0.01871(16) 0.00028(14) 0.00106(12) -0.00048(14)

O1 0.0205(10) 0.0230(10) 0.0229(10) 0.0019(9) -0.0006(8) -0.0062(8)

N2 0.0192(12) 0.0172(11) 0.0187(12) 0.0015(9) 0.0019(9) -0.0012(9)

C6 0.0246(15) 0.0146(13) 0.0281(17) 0.0006(12) 0.0059(13) 0.0022(11)

O2 0.0246(10) 0.0201(10) 0.0212(10) -0.0009(8) 0.0039(8) -0.0011(8)

N3 0.0209(12) 0.0156(11) 0.0205(12) -0.0003(9) 0.0014(10) -0.0017(9)

N5 0.0205(12) 0.0164(11) 0.0196(12) 0.0008(9) 0.0002(10) -0.0029(9)

N1 0.0201(12) 0.0162(11) 0.0183(12) 0.0019(9) 0.0033(9) 0.0013(9)

C18 0.0363(18) 0.052(2) 0.0192(15) 0.0002(16) 0.0033(13) 0.0096(16)

N6 0.0200(12) 0.0175(11) 0.0188(12) 0.0008(9) 0.0028(10) -0.0007(9)

N4 0.0229(12) 0.0157(11) 0.0170(12) 0.0007(9) 0.0016(9) 0.0011(9)

C14 0.0215(14) 0.0125(12) 0.0248(15) 0.0012(11) 0.0053(12) 0.0007(11)

C35 0.0164(13) 0.0128(12) 0.0145(14) -0.0004(10) 0.0022(11) 0.0036(10)

C29 0.0282(16) 0.0251(15) 0.0211(16) -0.0007(12) 0.0002(13) -0.0008(12)

C15 0.0187(14) 0.0189(14) 0.0229(15) 0.0015(11) 0.0040(11) 0.0039(11)

C12 0.0197(14) 0.0125(13) 0.0282(16) -0.0007(11) 0.0036(12) 0.0014(11)

C10 0.0264(15) 0.0202(14) 0.0264(16) 0.0011(12) 0.0071(12) 0.0008(12)

C22 0.0241(15) 0.0183(14) 0.0173(15) -0.0007(11) 0.0066(12) -0.0051(11)

C3 0.0286(15) 0.0150(13) 0.0201(15) 0.0031(11) 0.0057(12) 0.0008(11)

C5 0.0186(14) 0.0135(13) 0.0245(16) -0.0017(11) 0.0030(12) 0.0044(10)

C2 0.0237(15) 0.0201(14) 0.0189(15) 0.0031(11) 0.0052(12) 0.0045(11)

C23 0.0258(15) 0.0149(13) 0.0256(16) -0.0019(12) 0.0065(13) -0.0024(11)

C4 0.0203(14) 0.0147(13) 0.0228(15) 0.0011(11) 0.0069(11) 0.0022(11)

C30 0.0235(15) 0.0175(14) 0.0263(16) 0.0004(12) 0.0054(12) 0.0015(11)

C24 0.0225(15) 0.0159(13) 0.0204(15) 0.0011(11) 0.0071(12) -0.0036(11)

C25 0.0215(14) 0.0141(13) 0.0231(15) 0.0019(11) 0.0039(12) -0.0020(11)

N7 0.0274(13) 0.0212(12) 0.0291(14) 0.0023(10) 0.0014(11) 0.0052(10)

C32 0.0314(17) 0.0324(17) 0.0220(16) -0.0051(13) -0.0029(13) 0.0039(13)

C1 0.0313(17) 0.0229(15) 0.0228(16) 0.0041(12) 0.0029(13) 0.0024(12)

C11 0.0225(15) 0.0244(15) 0.0282(16) -0.0015(13) 0.0017(12) -0.0027(12)

C13 0.0235(15) 0.0158(13) 0.0244(15) 0.0015(11) 0.0054(12) -0.0011(11)

C8 0.0225(16) 0.0234(15) 0.0371(19) -0.0078(13) -0.0016(13) -0.0007(12)

C31 0.0299(16) 0.0280(16) 0.0163(15) 0.0002(12) 0.0012(12) 0.0036(13)

C28 0.0209(15) 0.0234(15) 0.0330(18) 0.0050(13) -0.0008(13) -0.0003(12)

C33 0.0179(15) 0.0281(16) 0.0381(19) -0.0075(14) 0.0002(13) 0.0001(12)

C34 0.0235(15) 0.0208(14) 0.0303(17) -0.0046(12) 0.0091(13) 0.0010(11)

C26 0.0285(16) 0.0211(14) 0.0240(16) 0.0003(12) 0.0080(13) 0.0010(12)

C21 0.0323(16) 0.0204(14) 0.0222(15) -0.0040(12) 0.0018(13) -0.0028(12)

C16 0.0269(16) 0.0224(15) 0.0286(17) 0.0014(12) 0.0094(13) 0.0043(12)

C19 0.0296(17) 0.0332(17) 0.0307(18) -0.0096(14) 0.0013(14) -0.0003(13)

C7 0.0282(16) 0.0236(15) 0.0217(15) -0.0018(12) 0.0005(12) 0.0034(12)

B1 0.0207(16) 0.0161(16) 0.0217(17) -0.0013(13) 0.0003(13) -0.0005(12)

C20 0.0237(15) 0.0241(15) 0.0264(16) 0.0002(12) 0.0046(13) 0.0003(12)

C9 0.0238(16) 0.0183(14) 0.0432(19) -0.0013(13) 0.0079(14) -0.0030(12)

C27 0.0262(16) 0.0223(15) 0.0365(18) 0.0010(13) 0.0112(14) 0.0039(12)

C17 0.0319(18) 0.0397(18) 0.0275(18) 0.0083(14) 0.0107(14) 0.0061(14)


_geom_special_details

;

  All esds (except the esd in the dihedral angle between two l.s. planes)

  are estimated using the full covariance matrix.  The cell esds are taken

  into account individually in the estimation of esds in distances, angles

  and torsion angles; correlations between esds in cell parameters are only

  used when they are defined by crystal symmetry.  An approximate (isotropic)

  treatment of cell esds is used for estimating esds involving l.s. planes.

;


loop_

  _geom_bond_atom_site_label_1

  _geom_bond_atom_site_label_2

  _geom_bond_distance

  _geom_bond_site_symmetry_2

  _geom_bond_publ_flag

Zn1 O1 1.9668(17) . ?

Zn1 N2 2.038(2) . ?

Zn1 N6 2.047(2) . ?

Zn1 O2 2.0933(18) . ?

Zn1 N4 2.216(2) . ?

O1 N7 1.323(3) . ?

N2 C4 1.344(3) . ?

N2 N1 1.374(3) . ?

C6 C7 1.377(4) . ?

C6 C5 1.391(4) . ?

O2 C35 1.285(3) . ?

N3 C12 1.360(3) . ?

N3 N4 1.367(3) . ?

N3 B1 1.556(4) . ?

N5 C22 1.359(3) . ?

N5 N6 1.368(3) . ?

N5 B1 1.546(3) . ?

N1 C2 1.360(3) . ?

N1 B1 1.539(3) . ?

C18 C19 1.377(4) . ?

C18 C17 1.385(4) . ?

N6 C24 1.351(3) . ?

N4 C14 1.351(3) . ?

C14 C13 1.395(3) . ?

C14 C15 1.468(4) . ?

C35 N7 1.370(3) . ?

C35 C34 1.387(3) . ?

C29 C30 1.380(4) . ?

C29 C28 1.384(4) . ?

C15 C20 1.390(3) . ?

C15 C16 1.394(3) . ?

C12 C13 1.370(4) . ?

C12 C11 1.487(3) . ?

C10 C9 1.387(4) . ?

C10 C5 1.394(3) . ?

C22 C23 1.373(3) . ?

C22 C21 1.499(3) . ?

C3 C2 1.378(3) . ?

C3 C4 1.390(3) . ?

C5 C4 1.467(3) . ?

C2 C1 1.485(3) . ?

C23 C24 1.391(3) . ?

C30 C25 1.394(4) . ?

C24 C25 1.464(4) . ?

C25 C26 1.396(3) . ?

N7 C31 1.378(3) . ?

C32 C31 1.359(4) . ?

C32 C33 1.393(4) . ?

C8 C9 1.379(4) . ?

C8 C7 1.384(4) . ?

C28 C27 1.380(4) . ?

C33 C34 1.362(4) . ?

C26 C27 1.379(4) . ?

C16 C17 1.384(4) . ?

C19 C20 1.386(4) . ?


loop_

  _geom_angle_atom_site_label_1

  _geom_angle_atom_site_label_2

  _geom_angle_atom_site_label_3

  _geom_angle

  _geom_angle_site_symmetry_1

  _geom_angle_site_symmetry_3

  _geom_angle_publ_flag

O1 Zn1 N2 133.23(8) . . ?

O1 Zn1 N6 128.36(8) . . ?

N2 Zn1 N6 98.38(8) . . ?

O1 Zn1 O2 79.36(7) . . ?

N2 Zn1 O2 95.50(7) . . ?

N6 Zn1 O2 100.32(7) . . ?

O1 Zn1 N4 93.91(7) . . ?

N2 Zn1 N4 85.12(8) . . ?

N6 Zn1 N4 88.10(8) . . ?

O2 Zn1 N4 171.35(7) . . ?

N7 O1 Zn1 112.33(14) . . ?

C4 N2 N1 106.8(2) . . ?

C4 N2 Zn1 137.68(18) . . ?

N1 N2 Zn1 115.16(15) . . ?

C7 C6 C5 120.7(3) . . ?

C35 O2 Zn1 109.57(15) . . ?


C12 N3 N4 110.5(2) . . ?

C12 N3 B1 127.9(2) . . ?

N4 N3 B1 121.6(2) . . ?

C22 N5 N6 109.7(2) . . ?

C22 N5 B1 130.0(2) . . ?

N6 N5 B1 120.1(2) . . ?

C2 N1 N2 109.7(2) . . ?

C2 N1 B1 130.7(2) . . ?

N2 N1 B1 119.5(2) . . ?

C19 C18 C17 119.5(3) . . ?

C24 N6 N5 106.8(2) . . ?

C24 N6 Zn1 137.73(18) . . ?

N5 N6 Zn1 112.93(15) . . ?

C14 N4 N3 106.01(19) . . ?

C14 N4 Zn1 141.74(17) . . ?

N3 N4 Zn1 109.47(14) . . ?

N4 C14 C13 109.7(2) . . ?

N4 C14 C15 123.5(2) . . ?

C13 C14 C15 126.7(2) . . ?

O2 C35 N7 117.9(2) . . ?

O2 C35 C34 124.4(2) . . ?

N7 C35 C34 117.7(2) . . ?

C30 C29 C28 120.7(3) . . ?

C20 C15 C16 118.2(3) . . ?

C20 C15 C14 122.2(2) . . ?

C16 C15 C14 119.5(2) . . ?

N3 C12 C13 107.2(2) . . ?

N3 C12 C11 123.3(2) . . ?

C13 C12 C11 129.4(2) . . ?

C9 C10 C5 120.4(3) . . ?

N5 C22 C23 107.7(2) . . ?

N5 C22 C21 122.7(2) . . ?

C23 C22 C21 129.4(2) . . ?

C2 C3 C4 106.8(2) . . ?

C6 C5 C10 118.7(2) . . ?

C6 C5 C4 121.6(2) . . ?

C10 C5 C4 119.6(2) . . ?

N1 C2 C3 107.2(2) . . ?

N1 C2 C1 123.5(2) . . ?

C3 C2 C1 129.3(2) . . ?

C22 C23 C24 106.5(2) . . ?

N2 C4 C3 109.4(2) . . ?

N2 C4 C5 122.0(2) . . ?

C3 C4 C5 128.6(2) . . ?

C29 C30 C25 120.7(2) . . ?

N6 C24 C23 109.4(2) . . ?

N6 C24 C25 122.2(2) . . ?

C23 C24 C25 128.5(2) . . ?

C30 C25 C26 118.1(2) . . ?

C30 C25 C24 122.6(2) . . ?

C26 C25 C24 119.4(2) . . ?

O1 N7 C35 118.0(2) . . ?

O1 N7 C31 121.0(2) . . ?

C35 N7 C31 120.9(2) . . ?

C31 C32 C33 119.0(3) . . ?

C12 C13 C14 106.6(2) . . ?

C9 C8 C7 119.8(3) . . ?

C32 C31 N7 121.0(3) . . ?

C27 C28 C29 119.1(3) . . ?

C34 C33 C32 119.5(3) . . ?

C33 C34 C35 121.9(3) . . ?

C27 C26 C25 120.8(3) . . ?

C17 C16 C15 121.0(3) . . ?

C18 C19 C20 120.6(3) . . ?

C6 C7 C8 120.3(3) . . ?

N1 B1 N5 110.0(2) . . ?

N1 B1 N3 109.6(2) . . ?

N5 B1 N3 108.0(2) . . ?

C19 C20 C15 120.6(3) . . ?

C8 C9 C10 120.2(3) . . ?

C26 C27 C28 120.7(3) . . ?

C18 C17 C16 120.0(3) . . ?


_diffrn_measured_fraction_theta_max    0.989

_diffrn_reflns_theta_full              27.59

_diffrn_measured_fraction_theta_full   0.989

_refine_diff_density_max    0.834

_refine_diff_density_min   -0.559

_refine_diff_density_rms    0.071

#===END

# 2. TITLE AND AUTHOR LIST


  _publ_section_title

  ;

  Examination of Novel Zinc-Binding Groups for Use in Matrix
Metalloproteinase Inhibitors

  ;


  loop

  _publ_author_name

  _publ_author_address

       'Cohen Seth M.'

;      Department of Chemistry and Biochemistry

        University of California, San Diego

        La Jolla

        CA 92093-0358

        USA

;

       'Puerta, David T.'

;      Department of Chemistry and Biochemistry

        University of California, San Diego

        La Jolla

        CA 92093-0358

        USA

;

#=========================================================================


Data
[Zn(hydrotris(5,3-Methylphenylpyrazolyl)borate)(2-mercaptopyridine-N-oxide)]


_audit_creation_method            SHELXL-97

_chemical_name_systematic

;

  ?

;

_chemical_name_common             TpZn(2-mercaptopyridine-N-oxide)

_chemical_melting_point           ?

_chemical_formula_moiety          ?

_chemical_formula_sum

  'C140 H128 B4 N28 O4 S4 Zn4'

_chemical_formula_weight          674.94


loop_

  _atom_type_symbol

  _atom_type_description

  _atom_type_scat_dispersion_real

  _atom_type_scat_dispersion_imag

  _atom_type_scat_source

  'C'  'C'   0.0033   0.0016

  'International Tables Vol C Tables 4.2.6.8 and 6.1.1.4'

  'H'  'H'   0.0000   0.0000

  'International Tables Vol C Tables 4.2.6.8 and 6.1.1.4'

  'B'  'B'   0.0013   0.0007

  'International Tables Vol C Tables 4.2.6.8 and 6.1.1.4'

  'N'  'N'   0.0061   0.0033

  'International Tables Vol C Tables 4.2.6.8 and 6.1.1.4'

  'O'  'O'   0.0106   0.0060

  'International Tables Vol C Tables 4.2.6.8 and 6.1.1.4'

  'S'  'S'   0.1246   0.1234

  'International Tables Vol C Tables 4.2.6.8 and 6.1.1.4'

  'Zn'  'Zn'   0.2839   1.4301

  'International Tables Vol C Tables 4.2.6.8 and 6.1.1.4'


_symmetry_cell_setting            Monoclinic

_symmetry_space_group_name_H-M    C2/c


loop_

  _symmetry_equiv_pos_as_xyz

  'x, y, z'

  '-x, y, -z+1/2'

  'x+1/2, y+1/2, z'

  '-x+1/2, y+1/2, -z+1/2'

  '-x, -y, -z'

  'x, -y, z-1/2'

  '-x+1/2, -y+1/2, -z'

  'x+1/2, -y+1/2, z-1/2'


_cell_length_a                    35.847(3)

_cell_length_b                    20.8129(15)

_cell_length_c                    34.388(3)

_cell_angle_alpha                 90.00

_cell_angle_beta                  100.2510(10)

_cell_angle_gamma                 90.00

_cell_volume                      25246(3)

_cell_formula_units_Z             32

_cell_measurement_temperature     100(2)

_cell_measurement_reflns_used     ?

_cell_measurement_theta_min       ?

_cell_measurement_theta_max       ?


_exptl_crystal_description        thick

_exptl_crystal_colour             colorless

_exptl_crystal_size_max           0.34

_exptl_crystal_size_mid           0.13

_exptl_crystal_size_min           0.05

_exptl_crystal_density_meas       0

_exptl_crystal_density_diffrn     0.178

_exptl_crystal_density_method     'not measured'

_exptl_crystal_F_000              1400

_exptl_absorpt_coefficient_mu     0.111

_exptl_absorpt_correction_type    none

_exptl_absorpt_correction_T_min   ?

_exptl_absorpt_correction_T_max   ?

_exptl_absorpt_process_details    ?


_exptl_special_details

;

  ?

;


_diffrn_ambient_temperature       100(2)

_diffrn_radiation_wavelength      0.71073

_diffrn_radiation_type            MoK\a

_diffrn_radiation_source          'fine-focus sealed tube'

_diffrn_radiation_monochromator   graphite

_diffrn_measurement_device_type   'CCD area detector'

_diffrn_measurement_method        'phi and omega scans'

_diffrn_detector_area_resol_mean  ?

_diffrn_standards_number          ?

_diffrn_standards_interval_count  ?

_diffrn_standards_interval_time   ?

_diffrn_standards_decay_%         ?

_diffrn_reflns_number             108046

_diffrn_reflns_av_R_equivalents   0.0484

_diffrn_reflns_av_sigmaI/netI     0.0509

_diffrn_reflns_limit_h_min        -46

_diffrn_reflns_limit_h_max        46

_diffrn_reflns_limit_k_min        -27

_diffrn_reflns_limit_k_max        27

_diffrn_reflns_limit_l_min        -44

_diffrn_reflns_limit_l_max        44

_diffrn_reflns_theta_min          1.15

_diffrn_reflns_theta_max          27.51

_reflns_number_total              28818

_reflns_number_gt                 17164

_reflns_threshold_expression      >2sigma(I)


_computing_data_collection        'Bruker SMART'

_computing_cell_refinement        'Bruker SMART'

_computing_data_reduction         'Bruker SAINT'

_computing_structure_solution     'SHELXS-97 (Sheldrick, 1990)'

_computing_structure_refinement   'SHELXL-97 (Sheldrick, 1997)'

_computing_molecular_graphics     'Bruker SHELXTL'

_computing_publication_material   'Bruker SHELXTL'


_refine_special_details

;

  Refinement of F^2^ against ALL reflections.  The weighted R-factor wR and

  goodness of fit S are based on F^2^, conventional R-factors R are based

  on F, with F set to zero for negative F^2^. The threshold expression of

  F^2^ > 2sigma(F^2^) is used only for calculating R-factors(gt) etc. and is

  not relevant to the choice of reflections for refinement.  R-factors based

  on F^2^ are statistically about twice as large as those based on F, and R-

  factors based on ALL data will be even larger.

;


_refine_ls_structure_factor_coef  Fsqd

_refine_ls_matrix_type            full

_refine_ls_weighting_scheme       calc

_refine_ls_weighting_details

  'calc w=1/[\s^2^(Fo^2^)+(0.0532P)^2^+0.0000P] where P=(Fo^2^+2Fc^2^)/3'

_atom_sites_solution_primary      direct

_atom_sites_solution_secondary    difmap

_atom_sites_solution_hydrogens    geom

_refine_ls_hydrogen_treatment     mixed

_refine_ls_extinction_method      none

_refine_ls_extinction_coef        ?

_refine_ls_number_reflns          28818

_refine_ls_number_parameters      1685

_refine_ls_number_restraints      0

_refine_ls_R_factor_all           0.0822

_refine_ls_R_factor_gt            0.0416

_refine_ls_wR_factor_ref          0.1112

_refine_ls_wR_factor_gt           0.0948

_refine_ls_goodness_of_fit_ref    0.987

_refine_ls_restrained_S_all       0.987

_refine_ls_shift/su_max           0.930

_refine_ls_shift/su_mean          0.160


loop_

  _atom_site_label

  _atom_site_type_symbol

  _atom_site_fract_x

  _atom_site_fract_y

  _atom_site_fract_z

  _atom_site_U_iso_or_equiv

  _atom_site_adp_type

  _atom_site_occupancy

  _atom_site_symmetry_multiplicity

  _atom_site_calc_flag

  _atom_site_refinement_flags

  _atom_site_disorder_assembly

  _atom_site_disorder_group

C44 C 0.31311(8) 0.66467(14) 0.49230(8) 0.0253(6) Uani 1 1 d . . .

H44 H 0.3016 0.7007 0.4780 0.030 Uiso 1 1 calc R . .

C42 C 0.33924(8) 0.55857(13) 0.49314(8) 0.0233(6) Uani 1 1 d . . .

H42 H 0.3454 0.5215 0.4794 0.028 Uiso 1 1 calc R . .

C43 C 0.32177(10) 0.61054(15) 0.47211(9) 0.0241(7) Uani 1 1 d . . .

H43 H 0.3158 0.6091 0.4441 0.029 Uiso 1 1 calc R . .

Zn1 Zn 0.100038(11) 0.713109(15) 0.622116(10) 0.01415(8) Uani 1 1 d . . .

S1 S 0.124105(18) 0.64866(3) 0.577168(18) 0.02042(15) Uani 1 1 d . . .

O1 O 0.04974(7) 0.70635(10) 0.58171(6) 0.0178(5) Uani 1 1 d . . .

N6 N 0.15063(8) 0.70712(11) 0.67107(7) 0.0159(5) Uani 1 1 d . . .

N1 N 0.10685(7) 0.83814(11) 0.66244(7) 0.0172(5) Uani 1 1 d . . .

N7 N 0.05148(8) 0.67717(12) 0.54768(8) 0.0157(6) Uani 1 1 d . . .

N5 N 0.14867(8) 0.75313(12) 0.69933(7) 0.0157(5) Uani 1 1 d . . .

N4 N 0.06964(8) 0.70245(12) 0.66755(7) 0.0153(6) Uani 1 1 d . . .

C4 C 0.09589(8) 0.86612(13) 0.60031(8) 0.0168(6) Uani 1 1 d . . .

C15 C 0.01999(10) 0.61926(14) 0.64886(9) 0.0162(7) Uani 1 1 d . . .

C25 C 0.19918(9) 0.62896(13) 0.65731(8) 0.0146(6) Uani 1 1 d . . .

C27 C 0.24958(10) 0.57947(14) 0.62955(9) 0.0200(7) Uani 1 1 d . . .

H27 H 0.2746 0.5809 0.6240 0.024 Uiso 1 1 calc R . .

C31 C 0.08459(7) 0.64995(12) 0.54057(8) 0.0157(6) Uani 1 1 d . . .

N2 N 0.10117(7) 0.81444(10) 0.62439(7) 0.0147(5) Uani 1 1 d . . .

N3 N 0.07825(8) 0.74816(12) 0.69685(7) 0.0154(6) Uani 1 1 d . . .

C26 C 0.23620(10) 0.62982(14) 0.64970(9) 0.0181(7) Uani 1 1 d . . .

H26 H 0.2523 0.6651 0.6584 0.022 Uiso 1 1 calc R . .

C35 C 0.01895(11) 0.67498(15) 0.52033(9) 0.0198(7) Uani 1 1 d . . .

H35 H -0.0040 0.6908 0.5270 0.024 Uiso 1 1 calc R . .

C24 C 0.18553(9) 0.68222(13) 0.67929(9) 0.0149(6) Uani 1 1 d . . .

C2 C 0.10522(9) 0.90318(13) 0.66170(9) 0.0195(6) Uani 1 1 d . . .

C29 C 0.19019(10) 0.52505(14) 0.62607(9) 0.0205(7) Uani 1 1 d . . .

H29 H 0.1745 0.4888 0.6184 0.025 Uiso 1 1 calc R . .

C13 C 0.02654(10) 0.69788(15) 0.70734(9) 0.0161(7) Uani 1 1 d . . .

H13 H 0.0052 0.6850 0.7184 0.019 Uiso 1 1 calc R . .

C32 C 0.08401(8) 0.62481(12) 0.50257(7) 0.0203(6) Uani 1 1 d . . .

H32 H 0.1065 0.6062 0.4966 0.024 Uiso 1 1 calc R . .

C12 C 0.05207(10) 0.74631(15) 0.72086(9) 0.0151(7) Uani 1 1 d . . .

C6 C 0.09672(8) 0.80956(13) 0.53549(8) 0.0196(6) Uani 1 1 d . . .

H6 H 0.1093 0.7739 0.5493 0.024 Uiso 1 1 calc R . .

C30 C 0.17643(10) 0.57559(13) 0.64583(9) 0.0170(7) Uani 1 1 d . . .

H30 H 0.1515 0.5737 0.6515 0.020 Uiso 1 1 calc R . .

C23 C 0.20655(9) 0.71276(13) 0.71280(8) 0.0182(7) Uani 1 1 d . . .

H23 H 0.2321 0.7044 0.7247 0.022 Uiso 1 1 calc R . .

C20 C 0.03990(10) 0.58009(14) 0.62696(9) 0.0217(7) Uani 1 1 d . . .

H20 H 0.0664 0.5863 0.6283 0.026 Uiso 1 1 calc R . .

C11 C 0.05282(10) 0.79150(15) 0.75471(9) 0.0235(7) Uani 1 1 d . . .

H11A H 0.0784 0.7927 0.7705 0.035 Uiso 1 1 calc R . .

H11B H 0.0349 0.7768 0.7713 0.035 Uiso 1 1 calc R . .

H11C H 0.0456 0.8346 0.7446 0.035 Uiso 1 1 calc R . .

C28 C 0.22632(10) 0.52683(14) 0.61747(9) 0.0204(7) Uani 1 1 d . . .

H28 H 0.2353 0.4925 0.6034 0.024 Uiso 1 1 calc R . .

C8 C 0.07027(10) 0.85998(15) 0.47403(10) 0.0256(7) Uani 1 1 d . . .

H8 H 0.0641 0.8589 0.4460 0.031 Uiso 1 1 calc R . .

C33 C 0.05230(9) 0.62612(14) 0.47388(9) 0.0228(7) Uani 1 1 d . . .

H33 H 0.0531 0.6109 0.4480 0.027 Uiso 1 1 calc R . .

C14 C 0.03850(10) 0.67178(14) 0.67419(9) 0.0149(7) Uani 1 1 d . . .

C17 C -0.03726(10) 0.56027(15) 0.62353(10) 0.0271(8) Uani 1 1 d . . .

H17 H -0.0636 0.5532 0.6227 0.032 Uiso 1 1 calc R . .

C16 C -0.01874(10) 0.60852(14) 0.64695(9) 0.0204(7) Uani 1 1 d . . .

H16 H -0.0326 0.6348 0.6620 0.025 Uiso 1 1 calc R . .

C5 C 0.08756(7) 0.86266(13) 0.55669(8) 0.0173(6) Uani 1 1 d . . .

C22 C 0.18247(9) 0.75710(14) 0.72457(9) 0.0171(6) Uani 1 1 d . . .

C21 C 0.18977(9) 0.80410(14) 0.75809(8) 0.0234(7) Uani 1 1 d . . .

H21A H 0.1886 0.8479 0.7476 0.035 Uiso 1 1 calc R . .

H21B H 0.2150 0.7963 0.7738 0.035 Uiso 1 1 calc R . .

H21C H 0.1705 0.7988 0.7748 0.035 Uiso 1 1 calc R . .

C34 C 0.01879(11) 0.65021(16) 0.48329(10) 0.0243(8) Uani 1 1 d . . .

H34 H -0.0040 0.6495 0.4643 0.029 Uiso 1 1 calc R . .

C3 C 0.09842(8) 0.92226(13) 0.62272(8) 0.0209(6) Uani 1 1 d . . .

H3 H 0.0960 0.9651 0.6131 0.025 Uiso 1 1 calc R . .

C19 C 0.02130(10) 0.53202(14) 0.60324(10) 0.0290(8) Uani 1 1 d . . .

H19 H 0.0351 0.5056 0.5882 0.035 Uiso 1 1 calc R . .

C18 C -0.01728(10) 0.52207(14) 0.60121(10) 0.0303(8) Uani 1 1 d . . .

H18 H -0.0299 0.4893 0.5847 0.036 Uiso 1 1 calc R . .

C9 C 0.06180(8) 0.91378(13) 0.49449(8) 0.0247(6) Uani 1 1 d . . .

H9 H 0.0502 0.9500 0.4804 0.030 Uiso 1 1 calc R . .

B1 B 0.11280(11) 0.79290(17) 0.69875(10) 0.0167(7) Uani 1 1 d . . .

C7 C 0.08780(8) 0.80795(13) 0.49452(8) 0.0224(6) Uani 1 1 d . . .

H7 H 0.0938 0.7710 0.4806 0.027 Uiso 1 1 calc R . .

C10 C 0.07015(8) 0.91502(13) 0.53530(8) 0.0219(6) Uani 1 1 d . . .

H10 H 0.0640 0.9520 0.5490 0.026 Uiso 1 1 calc R . .

C1 C 0.11025(11) 0.94386(14) 0.69815(9) 0.0316(8) Uani 1 1 d . . .

H1A H 0.0907 0.9330 0.7136 0.047 Uiso 1 1 calc R . .

H1B H 0.1080 0.9893 0.6906 0.047 Uiso 1 1 calc R . .

H1C H 0.1354 0.9359 0.7140 0.047 Uiso 1 1 calc R . .

Zn2 Zn 0.349750(10) 0.465018(15) 0.621135(10) 0.01373(8) Uani 1 1 d . . .

Zn3 Zn 0.849459(10) 0.442526(15) 0.621208(10) 0.01358(8) Uani 1 1 d . . .

Zn4 Zn 0.099303(11) 0.193960(15) 0.620307(10) 0.01366(8) Uani 1 1 d . . .

S4 S 0.110965(18) 0.11103(3) 0.578081(18) 0.01723(14) Uani 1 1 d . . .

S3 S 0.861468(18) 0.36118(3) 0.578159(18) 0.01706(13) Uani 1 1 d . . .

S2 S 0.373879(18) 0.39959(3) 0.576772(18) 0.02016(14) Uani 1 1 d . . .

O2 O 0.29974(7) 0.45875(10) 0.58035(6) 0.0165(5) Uani 1 1 d . . .

O3 O 0.79881(7) 0.45100(10) 0.58135(6) 0.0169(5) Uani 1 1 d . . .

N13 N 0.39994(8) 0.45863(11) 0.67007(7) 0.0145(5) Uani 1 1 d . . .

O4 O 0.04902(7) 0.20314(10) 0.57994(6) 0.0173(5) Uani 1 1 d . . .

N16 N 0.85614(7) 0.54294(11) 0.61950(7) 0.0168(5) Uani 1 1 d . . .

N9 N 0.35141(7) 0.56708(10) 0.62290(7) 0.0151(5) Uani 1 1 d . . .

N20 N 0.90286(8) 0.44102(11) 0.66723(7) 0.0156(6) Uani 1 1 d . . .

N11 N 0.31921(8) 0.45600(12) 0.66660(7) 0.0133(5) Uani 1 1 d . . .

N18 N 0.82008(8) 0.44252(12) 0.66785(8) 0.0146(6) Uani 1 1 d . . .

N8 N 0.35632(7) 0.59133(11) 0.66057(7) 0.0152(5) Uani 1 1 d . . .

N27 N 0.15207(8) 0.19221(11) 0.66634(7) 0.0160(6) Uani 1 1 d . . .

N23 N 0.10637(7) 0.29481(11) 0.61781(7) 0.0162(5) Uani 1 1 d . . .

N12 N 0.39884(7) 0.50666(11) 0.69727(7) 0.0142(5) Uani 1 1 d . . .

N14 N 0.30166(8) 0.42890(12) 0.54658(8) 0.0154(6) Uani 1 1 d . . .

N10 N 0.32778(8) 0.50198(12) 0.69544(7) 0.0148(6) Uani 1 1 d . . .

N15 N 0.86120(7) 0.57175(11) 0.65618(7) 0.0165(5) Uani 1 1 d . . .

N17 N 0.83141(8) 0.48984(11) 0.69528(7) 0.0151(6) Uani 1 1 d . . .

N21 N 0.79627(8) 0.42020(12) 0.54713(8) 0.0162(6) Uani 1 1 d . . .

N19 N 0.90216(8) 0.48795(11) 0.69523(7) 0.0153(5) Uani 1 1 d . . .

N28 N 0.04664(8) 0.17178(12) 0.54586(8) 0.0161(6) Uani 1 1 d . . .

N24 N 0.08124(8) 0.24396(12) 0.69387(8) 0.0158(6) Uani 1 1 d . . .

N26 N 0.15195(8) 0.24148(12) 0.69308(7) 0.0161(6) Uani 1 1 d . . .

N22 N 0.11127(7) 0.32461(11) 0.65407(7) 0.0160(5) Uani 1 1 d . . .

N25 N 0.06976(8) 0.19560(12) 0.66696(8) 0.0149(6) Uani 1 1 d . . .

C57 C 0.43332(9) 0.51423(13) 0.72041(9) 0.0165(6) Uani 1 1 d . . .

C92 C 0.93662(10) 0.49479(14) 0.71812(9) 0.0186(7) Uani 1 1 d . . .

C39 C 0.34622(8) 0.61814(13) 0.59827(8) 0.0165(6) Uani 1 1 d . . .

C48 C 0.27480(10) 0.45606(15) 0.70503(9) 0.0158(7) Uani 1 1 d . . .

H48 H 0.2530 0.4448 0.7157 0.019 Uiso 1 1 calc R . .

C100 C 0.98776(10) 0.36654(14) 0.64176(9) 0.0183(7) Uani 1 1 d . . .

H100 H 1.0039 0.4021 0.6500 0.022 Uiso 1 1 calc R . .

C95 C 0.95113(10) 0.36488(14) 0.65081(8) 0.0157(6) Uani 1 1 d . . .


C93 C 0.96045(9) 0.45037(14) 0.70506(9) 0.0185(6) Uani 1 1 d . . .

H93 H 0.9865 0.4434 0.7154 0.022 Uiso 1 1 calc R . .

C47 C 0.30060(10) 0.50300(15) 0.71853(9) 0.0165(7) Uani 1 1 d . . .

C98 C 0.97691(10) 0.26466(14) 0.60841(8) 0.0203(7) Uani 1 1 d . . .

H98 H 0.9854 0.2309 0.5936 0.024 Uiso 1 1 calc R . .

C75 C 0.84415(8) 0.58104(13) 0.54988(8) 0.0192(6) Uani 1 1 d . . .

C97 C 0.94077(10) 0.26253(14) 0.61782(9) 0.0193(7) Uani 1 1 d . . .

H97 H 0.9246 0.2272 0.6095 0.023 Uiso 1 1 calc R . .

C83 C 0.77780(10) 0.45158(15) 0.70845(9) 0.0165(7) Uani 1 1 d . . .

H83 H 0.7562 0.4443 0.7203 0.020 Uiso 1 1 calc R . .

C82 C 0.80585(10) 0.49591(15) 0.71986(10) 0.0169(7) Uani 1 1 d . . .

C94 C 0.93825(10) 0.41791(13) 0.67360(9) 0.0158(6) Uani 1 1 d . . .

C96 C 0.92837(10) 0.31191(13) 0.63939(9) 0.0168(7) Uani 1 1 d . . .

H96 H 0.9040 0.3094 0.6464 0.020 Uiso 1 1 calc R . .

C50 C 0.26879(10) 0.37424(14) 0.64762(9) 0.0156(7) Uani 1 1 d . . .

C59 C 0.43505(9) 0.43530(13) 0.67746(9) 0.0154(6) Uani 1 1 d . . .

C60 C 0.44843(10) 0.38017(13) 0.65652(8) 0.0151(6) Uani 1 1 d . . .

C66 C 0.33465(7) 0.40129(12) 0.53981(8) 0.0159(5) Uani 1 1 d . . .

C58 C 0.45722(10) 0.46915(13) 0.70859(9) 0.0189(7) Uani 1 1 d . . .

H58 H 0.4832 0.4624 0.7193 0.023 Uiso 1 1 calc R . .

C127 C 0.18755(9) 0.25089(14) 0.71406(8) 0.0160(6) Uani 1 1 d . . .

C46 C 0.30129(10) 0.54959(16) 0.75154(10) 0.0231(7) Uani 1 1 d . . .

H46A H 0.3269 0.5516 0.7672 0.035 Uiso 1 1 calc R . .

H46B H 0.2835 0.5356 0.7684 0.035 Uiso 1 1 calc R . .

H46C H 0.2939 0.5922 0.7407 0.035 Uiso 1 1 calc R . .

C99 C 1.00054(10) 0.31659(14) 0.62087(9) 0.0210(7) Uani 1 1 d . . .

H99 H 1.0255 0.3178 0.6151 0.025 Uiso 1 1 calc R . .

C49 C 0.28699(10) 0.42765(14) 0.67229(9) 0.0137(7) Uani 1 1 d . . .

C74 C 0.85149(8) 0.59102(13) 0.59267(8) 0.0176(6) Uani 1 1 d . . .

C76 C 0.85412(8) 0.52543(13) 0.53138(8) 0.0214(6) Uani 1 1 d . . .

H76 H 0.8663 0.4912 0.5470 0.026 Uiso 1 1 calc R . .

C118 C 0.02596(10) 0.20935(14) 0.70531(9) 0.0167(7) Uani 1 1 d . . .

H118 H 0.0036 0.2040 0.7163 0.020 Uiso 1 1 calc R . .

C130 C 0.20048(9) 0.11556(13) 0.65027(9) 0.0149(6) Uani 1 1 d . . .

C91 C 0.94494(9) 0.54307(14) 0.75069(9) 0.0233(7) Uani 1 1 d . . .

H91A H 0.9426 0.5865 0.7395 0.035 Uiso 1 1 calc R . .

H91B H 0.9708 0.5366 0.7652 0.035 Uiso 1 1 calc R . .

H91C H 0.9269 0.5378 0.7688 0.035 Uiso 1 1 calc R . .

C131 C 0.17731(10) 0.06191(13) 0.64025(9) 0.0158(6) Uani 1 1 d . . .

H131 H 0.1528 0.0605 0.6471 0.019 Uiso 1 1 calc R . .

C129 C 0.18802(9) 0.17052(14) 0.67172(8) 0.0143(6) Uani 1 1 d . . .

C104 C 0.76291(11) 0.40972(16) 0.48103(10) 0.0241(8) Uani 1 1 d . . .

H104 H 0.7425 0.4221 0.4608 0.029 Uiso 1 1 calc R . .

C116 C 0.05776(10) 0.30361(15) 0.74815(10) 0.0242(7) Uani 1 1 d . . .

H11D H 0.0826 0.3008 0.7654 0.036 Uiso 1 1 calc R . .

H11E H 0.0378 0.2973 0.7639 0.036 Uiso 1 1 calc R . .

H11F H 0.0549 0.3461 0.7356 0.036 Uiso 1 1 calc R . .

C140 C 0.01751(10) 0.18803(15) 0.51639(10) 0.0199(7) Uani 1 1 d . . .

H140 H -0.0007 0.2186 0.5214 0.024 Uiso 1 1 calc R . .

C117 C 0.05473(10) 0.25298(15) 0.71705(9) 0.0165(7) Uani 1 1 d . . .

C85 C 0.76476(10) 0.36795(14) 0.65261(9) 0.0143(6) Uani 1 1 d . . .

C81 C 0.80934(10) 0.54537(16) 0.75199(10) 0.0241(7) Uani 1 1 d . . .

H81A H 0.8354 0.5459 0.7666 0.036 Uiso 1 1 calc R . .

H81B H 0.7919 0.5348 0.7700 0.036 Uiso 1 1 calc R . .

H81C H 0.8029 0.5878 0.7403 0.036 Uiso 1 1 calc R . .

C128 C 0.21102(9) 0.20618(14) 0.70128(8) 0.0180(6) Uani 1 1 d . . .

H128 H 0.2374 0.2006 0.7106 0.022 Uiso 1 1 calc R . .

C65 C 0.48554(10) 0.37955(14) 0.64913(9) 0.0188(7) Uani 1 1 d . . .

H65 H 0.5016 0.4154 0.6566 0.023 Uiso 1 1 calc R . .

C135 C 0.23703(10) 0.11569(14) 0.64137(9) 0.0184(7) Uani 1 1 d . . .

H135 H 0.2531 0.1516 0.6485 0.022 Uiso 1 1 calc R . .

C101 C 0.82311(7) 0.37602(12) 0.54104(8) 0.0149(5) Uani 1 1 d . . .

C38 C 0.34826(8) 0.67476(13) 0.62064(8) 0.0202(6) Uani 1 1 d . . .

H38 H 0.3458 0.7175 0.6108 0.024 Uiso 1 1 calc R . .

C86 C 0.72609(10) 0.36428(14) 0.65398(9) 0.0174(7) Uani 1 1 d . . .

H86 H 0.7154 0.3930 0.6704 0.021 Uiso 1 1 calc R . .

C109 C 0.10173(7) 0.34159(13) 0.59035(8) 0.0172(6) Uani 1 1 d . . .

C110 C 0.09480(8) 0.33117(14) 0.54748(8) 0.0196(6) Uani 1 1 d . . .

C73 C 0.85406(9) 0.64999(14) 0.61257(9) 0.0234(7) Uani 1 1 d . . .

H73 H 0.8520 0.6915 0.6008 0.028 Uiso 1 1 calc R . .

C37 C 0.35443(9) 0.65646(13) 0.65935(9) 0.0191(6) Uani 1 1 d . . .

C90 C 0.77996(9) 0.32430(14) 0.62909(9) 0.0186(7) Uani 1 1 d . . .

H90 H 0.8063 0.3254 0.6284 0.022 Uiso 1 1 calc R . .

C56 C 0.44196(10) 0.56505(13) 0.75130(9) 0.0236(7) Uani 1 1 d . . .

H56A H 0.4425 0.6071 0.7386 0.035 Uiso 1 1 calc R . .

H56B H 0.4667 0.5565 0.7677 0.035 Uiso 1 1 calc R . .

H56C H 0.4224 0.5650 0.7679 0.035 Uiso 1 1 calc R . .

C139 C 0.01409(11) 0.16110(16) 0.47972(10) 0.0237(7) Uani 1 1 d . . .

H139 H -0.0059 0.1740 0.4592 0.028 Uiso 1 1 calc R . .

C72 C 0.86011(9) 0.63658(13) 0.65201(9) 0.0219(7) Uani 1 1 d . . .

C105 C 0.76677(11) 0.43565(15) 0.51821(10) 0.0202(7) Uani 1 1 d . . .

H105 H 0.7483 0.4652 0.5238 0.024 Uiso 1 1 calc R . .

C84 C 0.78724(10) 0.41899(14) 0.67571(9) 0.0141(7) Uani 1 1 d . . .

C132 C 0.19006(10) 0.01054(14) 0.62027(9) 0.0193(7) Uani 1 1 d . . .

H132 H 0.1739 -0.0251 0.6126 0.023 Uiso 1 1 calc R . .

C103 C 0.78958(9) 0.36483(15) 0.47370(9) 0.0241(7) Uani 1 1 d . . .

H103 H 0.7877 0.3461 0.4482 0.029 Uiso 1 1 calc R . .

C88 C 0.71873(9) 0.27645(14) 0.60772(9) 0.0207(7) Uani 1 1 d . . .

H88 H 0.7031 0.2456 0.5922 0.025 Uiso 1 1 calc R . .

C120 C 0.01371(10) 0.12305(14) 0.65122(9) 0.0146(7) Uani 1 1 d . . .

C121 C -0.02506(10) 0.11996(14) 0.65156(9) 0.0172(7) Uani 1 1 d . . .

H121 H -0.0363 0.1500 0.6668 0.021 Uiso 1 1 calc R . .

C125 C 0.02967(9) 0.07776(14) 0.62921(9) 0.0189(7) Uani 1 1 d . . .

H125 H 0.0561 0.0784 0.6291 0.023 Uiso 1 1 calc R . .

C70 C 0.26954(11) 0.42738(15) 0.51890(10) 0.0196(7) Uani 1 1 d . . .

H70 H 0.2467 0.4439 0.5253 0.024 Uiso 1 1 calc R . .

C107 C 0.10983(9) 0.38894(13) 0.64939(9) 0.0208(7) Uani 1 1 d . . .

C69 C 0.26933(11) 0.40266(16) 0.48197(10) 0.0236(8) Uani 1 1 d . . .

H69 H 0.2467 0.4025 0.4628 0.028 Uiso 1 1 calc R . .

C134 C 0.25007(10) 0.06385(14) 0.62220(9) 0.0193(7) Uani 1 1 d . . .

H134 H 0.2750 0.0641 0.6164 0.023 Uiso 1 1 calc R . .

C79 C 0.81995(9) 0.62583(15) 0.48520(9) 0.0266(7) Uani 1 1 d . . .

H79 H 0.8086 0.6605 0.4694 0.032 Uiso 1 1 calc R . .

C89 C 0.75713(9) 0.27913(14) 0.60663(9) 0.0214(7) Uani 1 1 d . . .

H89 H 0.7679 0.2500 0.5905 0.026 Uiso 1 1 calc R . .

C64 C 0.49906(10) 0.32710(15) 0.63106(9) 0.0223(7) Uani 1 1 d . . .

H64 H 0.5242 0.3274 0.6258 0.027 Uiso 1 1 calc R . .

C67 C 0.33442(8) 0.37618(12) 0.50193(7) 0.0202(6) Uani 1 1 d . . .

H67 H 0.3570 0.3574 0.4962 0.024 Uiso 1 1 calc R . .

C87 C 0.70304(9) 0.31910(14) 0.63158(9) 0.0198(7) Uani 1 1 d . . .

H87 H 0.6767 0.3173 0.6325 0.024 Uiso 1 1 calc R . .

C102 C 0.81877(8) 0.34762(12) 0.50365(8) 0.0200(6) Uani 1 1 d . . .

H102 H 0.8363 0.3157 0.4988 0.024 Uiso 1 1 calc R . .

C63 C 0.47585(10) 0.27405(14) 0.62066(9) 0.0231(7) Uani 1 1 d . . .

H63 H 0.4850 0.2381 0.6082 0.028 Uiso 1 1 calc R . .

C77 C 0.84644(8) 0.51967(14) 0.49060(8) 0.0259(6) Uani 1 1 d . . .

H77 H 0.8530 0.4812 0.4785 0.031 Uiso 1 1 calc R . .

C62 C 0.43934(10) 0.27371(14) 0.62856(8) 0.0196(7) Uani 1 1 d . . .

H62 H 0.4235 0.2373 0.6216 0.024 Uiso 1 1 calc R . .

B3 B 0.86698(11) 0.53096(15) 0.69411(11) 0.0164(8) Uani 1 1 d . . .

C61 C 0.42564(10) 0.32622(13) 0.64662(8) 0.0170(7) Uani 1 1 d . . .

H61 H 0.4006 0.3254 0.6523 0.020 Uiso 1 1 calc R . .

C68 C 0.30271(8) 0.37784(14) 0.47291(9) 0.0220(7) Uani 1 1 d . . .

H68 H 0.3036 0.3623 0.4471 0.026 Uiso 1 1 calc R . .

C78 C 0.82929(8) 0.56965(14) 0.46735(8) 0.0261(6) Uani 1 1 d . . .

H78 H 0.8240 0.5655 0.4394 0.031 Uiso 1 1 calc R . .

C136 C 0.07312(7) 0.12656(12) 0.54041(8) 0.0165(6) Uani 1 1 d . . .

C111 C 0.10511(8) 0.27532(13) 0.53003(8) 0.0217(6) Uani 1 1 d . . .

H111 H 0.1173 0.2416 0.5461 0.026 Uiso 1 1 calc R . .

C112 C 0.09767(8) 0.26836(14) 0.48920(8) 0.0268(6) Uani 1 1 d . . .

H112 H 0.1042 0.2295 0.4775 0.032 Uiso 1 1 calc R . .

C54 C 0.27096(10) 0.28416(14) 0.60385(10) 0.0269(8) Uani 1 1 d . . .

H54 H 0.2850 0.2568 0.5897 0.032 Uiso 1 1 calc R . .

C119 C 0.03627(10) 0.17469(14) 0.67410(9) 0.0145(7) Uani 1 1 d . . .

B2 B 0.36241(11) 0.54630(16) 0.69686(10) 0.0153(7) Uani 1 1 d . . .

C55 C 0.28945(10) 0.33361(14) 0.62724(9) 0.0204(7) Uani 1 1 d . . .

H55 H 0.3160 0.3395 0.6292 0.024 Uiso 1 1 calc R . .

C126 C 0.19697(9) 0.30301(14) 0.74405(8) 0.0223(7) Uani 1 1 d . . .

H12A H 0.1928 0.3449 0.7310 0.033 Uiso 1 1 calc R . .

H12B H 0.2236 0.2992 0.7568 0.033 Uiso 1 1 calc R . .

H12C H 0.1807 0.2991 0.7640 0.033 Uiso 1 1 calc R . .

C115 C 0.07784(7) 0.38043(13) 0.52302(8) 0.0216(6) Uani 1 1 d . . .

H115 H 0.0707 0.4190 0.5345 0.026 Uiso 1 1 calc R . .

C80 C 0.82706(7) 0.63132(13) 0.52569(8) 0.0214(6) Uani 1 1 d . . .

H80 H 0.8203 0.6698 0.5376 0.026 Uiso 1 1 calc R . .

C133 C 0.22623(10) 0.01129(14) 0.61157(9) 0.0196(7) Uani 1 1 d . . .

H133 H 0.2349 -0.0242 0.5983 0.024 Uiso 1 1 calc R . .

C122 C -0.04744(9) 0.07356(13) 0.62988(9) 0.0196(7) Uani 1 1 d . . .

H122 H -0.0738 0.0720 0.6305 0.024 Uiso 1 1 calc R . .

C41 C 0.34780(8) 0.56039(13) 0.53402(8) 0.0196(6) Uani 1 1 d . . .

H41 H 0.3602 0.5249 0.5481 0.023 Uiso 1 1 calc R . .

C108 C 0.10404(8) 0.40159(13) 0.60947(8) 0.0210(6) Uani 1 1 d . . .

H108 H 0.1020 0.4427 0.5973 0.025 Uiso 1 1 calc R . .

C123 C -0.03167(9) 0.02954(14) 0.60741(9) 0.0220(7) Uani 1 1 d . . .

H123 H -0.0471 -0.0018 0.5922 0.026 Uiso 1 1 calc R . .

C124 C 0.00693(9) 0.03189(14) 0.60751(9) 0.0234(7) Uani 1 1 d . . .

H124 H 0.0180 0.0015 0.5924 0.028 Uiso 1 1 calc R . .

C51 C 0.22987(10) 0.36415(15) 0.64488(9) 0.0196(7) Uani 1 1 d . . .

H51 H 0.2156 0.3915 0.6588 0.024 Uiso 1 1 calc R . .

C45 C 0.32110(7) 0.66637(13) 0.53296(8) 0.0220(6) Uani 1 1 d . . .

H45 H 0.3148 0.7036 0.5464 0.026 Uiso 1 1 calc R . .

C71 C 0.86494(11) 0.68188(14) 0.68680(10) 0.0324(8) Uani 1 1 d . . .

H71A H 0.8448 0.6741 0.7022 0.049 Uiso 1 1 calc R . .

H71B H 0.8634 0.7263 0.6773 0.049 Uiso 1 1 calc R . .

H71C H 0.8897 0.6746 0.7035 0.049 Uiso 1 1 calc R . .

C114 C 0.07119(10) 0.37421(16) 0.48236(10) 0.0280(8) Uani 1 1 d . . .

H114 H 0.0600 0.4086 0.4661 0.034 Uiso 1 1 calc R . .

C40 C 0.33837(7) 0.61411(13) 0.55480(8) 0.0175(6) Uani 1 1 d . . .

C137 C 0.06885(7) 0.09734(13) 0.50315(8) 0.0208(6) Uani 1 1 d . . .

H137 H 0.0862 0.0648 0.4987 0.025 Uiso 1 1 calc R . .

C138 C 0.03988(9) 0.11491(15) 0.47270(9) 0.0252(7) Uani 1 1 d . . .

H138 H 0.0378 0.0955 0.4474 0.030 Uiso 1 1 calc R . .

C52 C 0.21188(10) 0.31451(15) 0.62196(10) 0.0269(8) Uani 1 1 d . . .

H52 H 0.1855 0.3078 0.6206 0.032 Uiso 1 1 calc R . .

B4 B 0.11714(11) 0.28428(16) 0.69254(11) 0.0162(8) Uani 1 1 d . . .

C53 C 0.23213(10) 0.27468(14) 0.60114(10) 0.0278(8) Uani 1 1 d . . .

H53 H 0.2197 0.2411 0.5851 0.033 Uiso 1 1 calc R . .

C36 C 0.35901(11) 0.69725(14) 0.69567(9) 0.0308(8) Uani 1 1 d . . .

H36A H 0.3389 0.6870 0.7106 0.046 Uiso 1 1 calc R . .

H36B H 0.3573 0.7427 0.6881 0.046 Uiso 1 1 calc R . .

H36C H 0.3838 0.6888 0.7121 0.046 Uiso 1 1 calc R . .

C106 C 0.11413(11) 0.43540(14) 0.68331(9) 0.0335(8) Uani 1 1 d . . .

H10A H 0.0953 0.4257 0.6999 0.050 Uiso 1 1 calc R . .

H10B H 0.1102 0.4793 0.6731 0.050 Uiso 1 1 calc R . .

H10C H 0.1397 0.4316 0.6990 0.050 Uiso 1 1 calc R . .

C113 C 0.08084(8) 0.31786(14) 0.46539(8) 0.0271(6) Uani 1 1 d . . .

H113 H 0.0760 0.3131 0.4375 0.032 Uiso 1 1 calc R . .

H150 H 0.1159(7) 0.8205(12) 0.7255(8) 0.010(7) Uiso 1 1 d . . .

H151 H 0.3658(8) 0.5756(12) 0.7222(8) 0.014(7) Uiso 1 1 d . . .

H152 H 0.1231(8) 0.3162(12) 0.7186(8) 0.013(8) Uiso 1 1 d . . .

H153 H 0.8735(9) 0.5634(14) 0.7196(9) 0.025(9) Uiso 1 1 d . . .


loop_

  _atom_site_aniso_label

  _atom_site_aniso_U_11

  _atom_site_aniso_U_22

  _atom_site_aniso_U_33

  _atom_site_aniso_U_23

  _atom_site_aniso_U_13

  _atom_site_aniso_U_12

C44 0.0254(15) 0.0291(16) 0.0209(15) 0.0093(12) 0.0026(12) -0.0032(12)

C42 0.0274(16) 0.0245(15) 0.0188(15) 0.0002(12) 0.0066(12) -0.0045(12)

C43 0.0275(18) 0.0301(17) 0.0147(15) 0.0018(13) 0.0035(13) -0.0086(14)

Zn1 0.01378(17) 0.01845(17) 0.01079(16) -0.00290(13) 0.00373(13) -0.00075(13)

S1 0.0167(3) 0.0316(4) 0.0119(3) -0.0048(3) -0.0002(3) 0.0082(3)

O1 0.0175(14) 0.0247(11) 0.0113(11) -0.0052(9) 0.0036(10) 0.0014(10)

N6 0.0188(14) 0.0183(12) 0.0114(12) -0.0038(9) 0.0045(10) -0.0006(10)

N1 0.0168(13) 0.0181(12) 0.0168(13) -0.0058(10) 0.0030(10) -0.0024(10)

N7 0.0164(14) 0.0181(12) 0.0131(13) -0.0001(10) 0.0036(11) -0.0001(10)

N5 0.0161(13) 0.0193(12) 0.0121(12) -0.0039(9) 0.0038(10) -0.0017(10)

N4 0.0181(15) 0.0173(12) 0.0103(12) -0.0048(10) 0.0017(11) -0.0023(10)

C4 0.0105(13) 0.0200(14) 0.0213(15) 0.0014(12) 0.0068(11) 0.0022(11)

C15 0.0201(17) 0.0177(14) 0.0106(14) 0.0047(11) 0.0022(12) -0.0005(12)

C25 0.0154(15) 0.0201(14) 0.0072(13) 0.0031(11) -0.0008(11) 0.0008(11)

C27 0.0157(16) 0.0272(16) 0.0183(15) 0.0074(12) 0.0059(12) 0.0069(12)

C31 0.0147(14) 0.0182(13) 0.0140(13) 0.0020(11) 0.0020(11) 0.0015(10)

N2 0.0134(12) 0.0196(12) 0.0113(12) -0.0023(9) 0.0028(9) -0.0023(9)

N3 0.0171(15) 0.0205(12) 0.0093(12) -0.0026(9) 0.0041(11) -0.0001(10)

C26 0.0148(15) 0.0210(14) 0.0170(15) 0.0042(12) -0.0010(12) 0.0007(12)

C35 0.0147(17) 0.0262(15) 0.0175(16) 0.0013(12) -0.0001(13) -0.0010(13)

C24 0.0137(15) 0.0182(14) 0.0115(14) 0.0039(11) -0.0008(12) -0.0011(11)

C2 0.0196(15) 0.0179(14) 0.0211(16) -0.0023(12) 0.0040(12) -0.0028(11)

C29 0.0241(17) 0.0173(14) 0.0196(15) 0.0010(12) 0.0028(13) 0.0009(12)

C13 0.0153(17) 0.0192(14) 0.0148(15) 0.0018(12) 0.0055(13) 0.0000(12)

C32 0.0251(15) 0.0214(14) 0.0150(14) -0.0024(11) 0.0048(12) 0.0011(11)

C12 0.0150(16) 0.0196(14) 0.0108(14) 0.0004(11) 0.0027(12) 0.0019(12)

C6 0.0205(15) 0.0201(15) 0.0190(15) 0.0026(12) 0.0056(12) -0.0029(12)

C30 0.0141(15) 0.0227(14) 0.0147(14) 0.0017(11) 0.0042(12) 0.0007(12)

C23 0.0167(16) 0.0221(14) 0.0134(15) 0.0022(11) -0.0035(12) -0.0002(11)

C20 0.0227(17) 0.0211(14) 0.0207(16) -0.0015(12) 0.0024(13) 0.0014(12)

C11 0.0267(18) 0.0289(16) 0.0173(16) -0.0055(12) 0.0103(13) -0.0039(13)

C28 0.0230(17) 0.0203(15) 0.0173(15) 0.0030(12) 0.0023(12) 0.0088(12)

C8 0.0257(18) 0.0347(18) 0.0163(15) 0.0040(13) 0.0034(13) -0.0089(14)

C33 0.0298(19) 0.0244(15) 0.0138(14) -0.0046(11) 0.0025(13) -0.0037(13)

C14 0.0150(18) 0.0169(14) 0.0125(15) 0.0046(12) 0.0012(14) 0.0023(12)

C17 0.0235(19) 0.0256(16) 0.0291(18) 0.0072(13) -0.0034(14) -0.0098(13)

C16 0.0238(18) 0.0204(15) 0.0167(15) 0.0047(12) 0.0025(13) -0.0014(12)

C5 0.0135(13) 0.0222(14) 0.0169(14) 0.0012(11) 0.0046(11) -0.0038(11)

C22 0.0171(15) 0.0209(14) 0.0121(14) 0.0011(11) -0.0010(12) -0.0047(11)

C21 0.0227(16) 0.0283(15) 0.0164(15) -0.0075(12) -0.0042(12) -0.0012(12)

C34 0.0186(18) 0.0338(17) 0.0188(16) -0.0010(14) -0.0015(14) -0.0029(14)

C3 0.0190(15) 0.0186(14) 0.0254(16) 0.0000(12) 0.0047(12) -0.0009(11)

C19 0.039(2) 0.0191(15) 0.0279(18) -0.0070(12) 0.0028(15) 0.0013(14)

C18 0.043(2) 0.0168(14) 0.0272(18) -0.0009(12) -0.0038(16) -0.0066(15)

C9 0.0247(15) 0.0266(15) 0.0225(15) 0.0065(12) 0.0030(12) -0.0013(12)

B1 0.0176(18) 0.0214(16) 0.0115(16) -0.0032(13) 0.0037(14) -0.0022(13)

C7 0.0218(15) 0.0275(15) 0.0183(15) 0.0002(12) 0.0045(12) -0.0049(12)

C10 0.0211(15) 0.0230(14) 0.0220(15) 0.0022(11) 0.0053(12) -0.0012(11)

C1 0.048(2) 0.0210(15) 0.0258(18) -0.0073(13) 0.0079(16) -0.0021(14)

Zn2 0.01365(16) 0.01805(17) 0.00984(15) -0.00261(13) 0.00307(12) -0.00056(13)

Zn3 0.01358(16) 0.01599(16) 0.01180(16) -0.00178(13) 0.00396(13) -0.00009(13)

Zn4 0.01351(17) 0.01623(16) 0.01181(16) -0.00222(12) 0.00377(13) -0.00031(13)

S4 0.0180(3) 0.0208(3) 0.0126(3) -0.0022(2) 0.0018(3) 0.0054(3)

S3 0.0179(3) 0.0202(3) 0.0129(3) -0.0014(2) 0.0022(3) 0.0049(3)

S2 0.0175(3) 0.0306(4) 0.0114(3) -0.0045(3) -0.0003(3) 0.0085(3)

O2 0.0166(13) 0.0213(11) 0.0120(11) -0.0051(9) 0.0033(10) 0.0015(9)

O3 0.0167(13) 0.0218(10) 0.0124(11) -0.0053(9) 0.0027(10) 0.0017(10)

N13 0.0159(13) 0.0173(12) 0.0101(12) -0.0022(9) 0.0020(10) -0.0021(10)

O4 0.0175(14) 0.0225(10) 0.0119(11) -0.0059(9) 0.0029(10) 0.0021(10)

N16 0.0145(12) 0.0191(12) 0.0172(12) -0.0025(10) 0.0036(10) -0.0014(10)

N9 0.0124(12) 0.0199(12) 0.0129(12) -0.0027(10) 0.0019(9) 0.0005(10)

N20 0.0160(13) 0.0166(12) 0.0143(12) -0.0025(9) 0.0027(10) -0.0006(10)

N11 0.0129(14) 0.0148(11) 0.0119(12) -0.0033(9) 0.0015(11) -0.0011(10)

N18 0.0130(14) 0.0166(12) 0.0144(13) -0.0040(9) 0.0032(11) -0.0001(10)

N8 0.0157(12) 0.0181(12) 0.0119(11) -0.0029(9) 0.0026(9) 0.0019(10)

N27 0.0170(13) 0.0172(12) 0.0138(12) -0.0034(9) 0.0025(10) 0.0001(10)

N23 0.0140(12) 0.0184(11) 0.0164(12) -0.0026(9) 0.0036(9) -0.0022(9)

N12 0.0123(12) 0.0189(12) 0.0114(11) -0.0022(9) 0.0017(9) -0.0030(9)

N14 0.0150(14) 0.0196(12) 0.0120(13) -0.0023(10) 0.0031(10) -0.0018(10)

N10 0.0150(14) 0.0186(12) 0.0112(12) -0.0040(9) 0.0032(11) 0.0001(10)

N15 0.0176(13) 0.0169(12) 0.0146(12) -0.0033(9) 0.0019(10) -0.0005(10)

N17 0.0162(14) 0.0174(12) 0.0119(12) -0.0053(9) 0.0026(11) 0.0006(10)

N21 0.0144(14) 0.0183(12) 0.0165(13) -0.0019(10) 0.0045(11) -0.0025(10)

N19 0.0145(13) 0.0178(12) 0.0129(12) -0.0027(10) 0.0006(10) -0.0002(10)

N28 0.0160(14) 0.0197(12) 0.0129(13) -0.0013(10) 0.0039(11) -0.0006(10)

N24 0.0156(14) 0.0191(12) 0.0128(13) -0.0010(10) 0.0028(11) 0.0006(10)

N26 0.0183(14) 0.0188(12) 0.0112(12) -0.0049(9) 0.0024(10) -0.0026(10)

N22 0.0149(12) 0.0172(11) 0.0160(13) -0.0037(9) 0.0033(10) -0.0014(9)

N25 0.0178(15) 0.0154(11) 0.0118(13) -0.0022(9) 0.0032(11) 0.0007(10)

C57 0.0202(15) 0.0193(14) 0.0093(13) 0.0016(11) 0.0006(11) -0.0036(12)

C92 0.0203(16) 0.0213(15) 0.0135(14) 0.0016(11) 0.0013(12) -0.0011(12)


C39 0.0103(13) 0.0203(14) 0.0187(14) 0.0014(12) 0.0024(11) -0.0018(11)

C48 0.0158(17) 0.0205(14) 0.0120(15) 0.0032(12) 0.0051(13) -0.0001(12)

C100 0.0153(16) 0.0206(15) 0.0183(15) 0.0057(12) 0.0013(12) -0.0002(12)

C95 0.0174(15) 0.0210(14) 0.0078(13) 0.0017(11) 0.0002(11) 0.0019(12)

C93 0.0167(15) 0.0206(14) 0.0172(14) 0.0018(11) 0.0009(12) 0.0015(12)

C47 0.0174(17) 0.0208(14) 0.0121(15) 0.0012(12) 0.0049(13) 0.0028(12)

C98 0.0240(17) 0.0234(14) 0.0141(15) 0.0017(11) 0.0052(13) 0.0092(12)

C75 0.0142(14) 0.0229(15) 0.0207(16) 0.0037(12) 0.0037(12) -0.0043(12)

C97 0.0205(16) 0.0197(14) 0.0166(15) 0.0003(11) 0.0002(13) 0.0027(12)

C83 0.0183(18) 0.0211(14) 0.0111(15) 0.0006(12) 0.0054(13) 0.0013(13)

C82 0.0182(17) 0.0189(14) 0.0147(15) 0.0010(12) 0.0063(13) 0.0035(12)

C94 0.0186(16) 0.0146(13) 0.0152(14) 0.0016(11) 0.0055(12) -0.0003(11)

C96 0.0183(16) 0.0186(14) 0.0138(14) 0.0026(11) 0.0032(12) 0.0019(12)

C50 0.0193(16) 0.0157(14) 0.0114(14) 0.0038(11) 0.0015(12) 0.0005(11)

C59 0.0164(16) 0.0182(14) 0.0114(14) 0.0042(11) 0.0023(12) -0.0023(11)

C60 0.0179(16) 0.0173(14) 0.0092(13) 0.0040(11) -0.0003(11) 0.0031(11)

C66 0.0151(14) 0.0179(13) 0.0147(13) -0.0010(11) 0.0026(11) 0.0028(10)

C58 0.0173(16) 0.0232(15) 0.0149(14) 0.0021(11) -0.0009(12) 0.0003(12)

C127 0.0147(15) 0.0197(13) 0.0130(14) 0.0012(11) 0.0003(12) -0.0019(11)

C46 0.0261(18) 0.0260(15) 0.0190(16) -0.0069(12) 0.0091(13) 0.0020(13)

C99 0.0183(16) 0.0278(16) 0.0179(16) 0.0063(12) 0.0058(13) 0.0066(12)

C49 0.0157(18) 0.0159(14) 0.0102(15) 0.0012(11) 0.0043(13) 0.0012(12)

C74 0.0101(13) 0.0213(14) 0.0217(15) 0.0037(12) 0.0038(11) 0.0006(11)

C76 0.0238(15) 0.0219(14) 0.0199(15) 0.0042(12) 0.0074(12) -0.0042(12)

C118 0.0162(17) 0.0201(15) 0.0148(15) 0.0010(12) 0.0057(13) 0.0041(12)

C130 0.0139(15) 0.0182(14) 0.0115(14) 0.0035(11) -0.0007(11) 0.0024(11)

C91 0.0230(16) 0.0251(15) 0.0188(15) -0.0071(12) -0.0042(12) -0.0021(12)

C131 0.0113(15) 0.0219(15) 0.0146(14) 0.0031(11) 0.0029(12) 0.0015(11)

C129 0.0132(15) 0.0177(13) 0.0115(14) 0.0046(11) 0.0010(11) 0.0009(11)

C104 0.0178(17) 0.0343(17) 0.0184(16) 0.0001(13) -0.0021(13) -0.0047(13)

C116 0.0247(17) 0.0272(16) 0.0226(16) -0.0072(13) 0.0093(14) -0.0020(13)

C140 0.0120(16) 0.0252(15) 0.0212(17) 0.0005(13) -0.0002(13) -0.0004(12)

C117 0.0179(17) 0.0196(14) 0.0122(15) 0.0003(11) 0.0030(13) 0.0035(12)

C85 0.0149(16) 0.0147(13) 0.0127(14) 0.0042(11) 0.0012(12) -0.0009(11)

C81 0.0277(18) 0.0276(16) 0.0194(16) -0.0068(12) 0.0103(14) 0.0019(13)

C128 0.0144(15) 0.0228(14) 0.0156(15) 0.0015(11) -0.0006(12) -0.0019(11)

C65 0.0160(16) 0.0201(14) 0.0189(16) 0.0052(12) -0.0002(12) -0.0009(12)

C135 0.0169(16) 0.0205(15) 0.0175(15) 0.0052(12) 0.0019(12) 0.0004(12)

C101 0.0143(14) 0.0178(13) 0.0136(13) 0.0005(11) 0.0055(11) -0.0016(10)

C38 0.0191(15) 0.0189(14) 0.0223(15) 0.0000(11) 0.0030(12) -0.0007(12)

C86 0.0189(16) 0.0189(14) 0.0151(15) 0.0022(11) 0.0049(12) 0.0014(11)

C109 0.0120(13) 0.0207(14) 0.0187(14) 0.0013(11) 0.0022(11) -0.0026(11)

C110 0.0150(14) 0.0222(15) 0.0220(16) 0.0033(12) 0.0047(12) -0.0065(12)

C73 0.0263(17) 0.0168(15) 0.0264(17) 0.0014(12) 0.0029(13) 0.0004(13)

C37 0.0193(15) 0.0156(14) 0.0228(16) -0.0042(11) 0.0043(12) -0.0011(11)

C90 0.0191(17) 0.0191(14) 0.0186(15) 0.0005(11) 0.0062(12) -0.0002(11)

C56 0.0215(16) 0.0245(16) 0.0233(15) -0.0051(12) -0.0004(12) -0.0026(12)

C139 0.0155(16) 0.0370(18) 0.0163(16) 0.0014(14) -0.0033(13) -0.0006(14)

C72 0.0193(15) 0.0184(15) 0.0281(17) -0.0035(12) 0.0047(13) -0.0022(12)

C105 0.0126(17) 0.0277(16) 0.0205(17) 0.0015(13) 0.0035(14) 0.0000(13)

C84 0.0153(18) 0.0165(14) 0.0116(15) 0.0025(11) 0.0057(13) 0.0012(12)

C132 0.0203(16) 0.0175(14) 0.0195(15) 0.0032(11) 0.0019(13) 0.0026(12)

C103 0.0245(18) 0.0303(16) 0.0167(15) -0.0065(12) 0.0013(13) -0.0069(13)

C88 0.0253(18) 0.0177(14) 0.0183(15) 0.0011(11) 0.0015(13) -0.0056(12)

C120 0.0171(16) 0.0149(13) 0.0121(14) 0.0055(11) 0.0032(12) 0.0010(11)

C121 0.0193(16) 0.0189(14) 0.0145(14) 0.0040(11) 0.0059(12) 0.0027(11)

C125 0.0178(17) 0.0188(14) 0.0210(16) 0.0012(12) 0.0061(12) -0.0008(11)

C70 0.0121(17) 0.0293(16) 0.0172(16) -0.0013(13) 0.0019(13) -0.0011(13)

C107 0.0198(15) 0.0159(14) 0.0275(17) -0.0014(12) 0.0060(13) -0.0003(11)

C69 0.0198(18) 0.0348(17) 0.0144(16) -0.0021(13) -0.0021(13) -0.0042(14)

C134 0.0149(15) 0.0256(16) 0.0186(15) 0.0069(12) 0.0060(12) 0.0026(12)

C79 0.0174(16) 0.0298(17) 0.0317(19) 0.0089(14) 0.0022(14) -0.0026(13)

C89 0.0257(19) 0.0188(14) 0.0217(15) -0.0034(11) 0.0094(14) -0.0051(13)

C64 0.0202(17) 0.0284(16) 0.0185(16) 0.0062(13) 0.0040(13) 0.0063(13)

C67 0.0201(14) 0.0242(14) 0.0164(14) -0.0036(11) 0.0036(11) 0.0032(11)

C87 0.0150(15) 0.0237(15) 0.0206(15) 0.0086(12) 0.0031(12) -0.0037(11)

C102 0.0238(15) 0.0187(14) 0.0182(14) -0.0030(11) 0.0051(12) 0.0007(11)

C63 0.0276(18) 0.0231(15) 0.0176(16) 0.0006(12) 0.0014(13) 0.0079(13)

C77 0.0303(16) 0.0246(15) 0.0241(16) -0.0011(12) 0.0083(13) -0.0088(13)

C62 0.0233(17) 0.0201(14) 0.0135(15) -0.0007(12) -0.0022(13) 0.0016(12)

B3 0.0170(18) 0.0147(15) 0.0175(17) -0.0039(12) 0.0031(14) -0.0006(13)

C61 0.0178(16) 0.0223(14) 0.0102(14) 0.0044(11) 0.0007(12) 0.0005(12)

C68 0.0257(18) 0.0278(16) 0.0120(14) -0.0038(12) 0.0016(13) -0.0023(13)

C78 0.0249(16) 0.0348(17) 0.0182(15) 0.0012(13) 0.0030(12) -0.0115(13)

C136 0.0141(14) 0.0168(13) 0.0191(14) 0.0010(11) 0.0044(11) -0.0003(10)

C111 0.0212(15) 0.0233(14) 0.0217(15) 0.0038(12) 0.0073(12) -0.0042(12)

C112 0.0302(17) 0.0289(16) 0.0239(15) -0.0026(12) 0.0121(13) -0.0084(13)

C54 0.038(2) 0.0176(15) 0.0248(17) -0.0062(12) 0.0048(15) 0.0044(13)

C119 0.0158(18) 0.0156(14) 0.0121(15) 0.0063(12) 0.0021(14) 0.0036(12)

B2 0.0171(18) 0.0160(15) 0.0122(16) -0.0029(12) 0.0014(13) 0.0002(13)

C55 0.0217(17) 0.0195(14) 0.0194(15) 0.0002(12) 0.0020(12) -0.0015(12)

C126 0.0173(15) 0.0267(15) 0.0218(16) -0.0039(12) 0.0007(12) -0.0022(11)

C115 0.0169(14) 0.0254(15) 0.0223(15) 0.0026(12) 0.0026(12) -0.0025(11)

C80 0.0171(14) 0.0239(14) 0.0226(15) 0.0020(12) 0.0018(12) -0.0022(11)

C133 0.0215(16) 0.0210(14) 0.0167(15) 0.0034(11) 0.0045(12) 0.0089(12)

C122 0.0154(15) 0.0201(14) 0.0235(16) 0.0074(12) 0.0039(12) -0.0010(11)

C41 0.0191(15) 0.0209(15) 0.0194(16) 0.0028(12) 0.0052(12) -0.0020(12)

C108 0.0223(16) 0.0174(14) 0.0232(16) 0.0014(12) 0.0034(13) -0.0018(12)

C123 0.0254(18) 0.0187(14) 0.0200(16) 0.0016(12) -0.0008(13) -0.0050(12)

C124 0.029(2) 0.0216(15) 0.0220(16) -0.0051(12) 0.0100(15) -0.0003(13)

C51 0.0162(16) 0.0212(14) 0.0211(16) 0.0037(12) 0.0021(13) -0.0014(12)

C45 0.0212(14) 0.0222(14) 0.0228(15) 0.0035(12) 0.0047(12) -0.0008(12)

C71 0.051(2) 0.0162(15) 0.0307(19) -0.0072(13) 0.0081(16) -0.0002(14)

C114 0.0214(17) 0.0366(19) 0.0248(18) 0.0099(14) 0.0007(14) -0.0046(14)

C40 0.0154(13) 0.0218(14) 0.0154(14) 0.0016(11) 0.0032(11) -0.0039(11)

C137 0.0198(14) 0.0237(14) 0.0188(14) -0.0046(11) 0.0035(12) 0.0004(11)

C138 0.0240(18) 0.0321(17) 0.0191(15) -0.0065(12) 0.0025(13) -0.0079(13)

C52 0.0239(18) 0.0248(16) 0.0295(18) 0.0057(13) -0.0022(14) -0.0091(13)

B4 0.0171(18) 0.0167(15) 0.0148(17) -0.0022(12) 0.0022(14) -0.0005(12)

C53 0.032(2) 0.0198(14) 0.0278(18) 0.0011(12) -0.0049(15) -0.0067(14)

C36 0.048(2) 0.0200(15) 0.0237(17) -0.0063(13) 0.0060(15) -0.0013(14)

C106 0.051(2) 0.0202(15) 0.0298(19) -0.0060(14) 0.0074(17) -0.0007(14)

C113 0.0258(16) 0.0378(17) 0.0176(15) 0.0003(13) 0.0038(12) -0.0126(13)


_geom_special_details

;

  All esds (except the esd in the dihedral angle between two l.s. planes)

  are estimated using the full covariance matrix.  The cell esds are taken

  into account individually in the estimation of esds in distances, angles

  and torsion angles; correlations between esds in cell parameters are only

  used when they are defined by crystal symmetry.  An approximate (isotropic)

  treatment of cell esds is used for estimating esds involving l.s. planes.

;


loop_

  _geom_bond_atom_site_label_1

  _geom_bond_atom_site_label_2

  _geom_bond_distance

  _geom_bond_site_symmetry_2

  _geom_bond_publ_flag

C44 C45 1.377(4) . ?

C44 C43 1.387(4) . ?

C42 C41 1.385(4) . ?

C42 C43 1.387(4) . ?

Zn1 N4 2.070(3) . ?

Zn1 O1 2.076(2) . ?

Zn1 N2 2.111(2) . ?

Zn1 N6 2.248(3) . ?

Zn1 S1 2.3253(7) . ?

S1 C31 1.719(3) . ?

O1 N7 1.330(3) . ?

N6 C24 1.337(4) . ?

N6 N5 1.375(3) . ?

N1 C2 1.355(3) . ?

N1 N2 1.379(3) . ?

N1 B1 1.548(4) . ?

N7 C35 1.362(4) . ?

N7 C31 1.376(4) . ?

N5 C22 1.362(4) . ?

N5 B1 1.526(5) . ?

N4 C14 1.340(4) . ?

N4 N3 1.380(4) . ?

C4 N2 1.350(3) . ?

C4 C3 1.394(4) . ?

C4 C5 1.478(4) . ?

C15 C20 1.390(4) . ?

C15 C16 1.396(5) . ?

C15 C14 1.480(4) . ?

C25 C30 1.393(4) . ?

C25 C26 1.398(4) . ?

C25 C24 1.473(4) . ?

C27 C26 1.388(4) . ?

C27 C28 1.395(4) . ?

C31 C32 1.404(3) . ?

N3 C12 1.356(4) . ?

N3 B1 1.542(5) . ?

C35 C34 1.373(5) . ?

C24 C23 1.411(4) . ?

C2 C3 1.378(4) . ?

C2 C1 1.497(4) . ?

C29 C28 1.379(5) . ?

C29 C30 1.390(4) . ?

C13 C12 1.385(5) . ?

C13 C14 1.397(4) . ?

C32 C33 1.367(4) . ?

C12 C11 1.493(4) . ?

C6 C7 1.388(4) . ?

C6 C5 1.395(4) . ?

C23 C22 1.373(4) . ?

C20 C19 1.385(4) . ?

C8 C7 1.381(4) . ?

C8 C9 1.385(4) . ?

C33 C34 1.392(5) . ?

C17 C16 1.381(4) . ?

C17 C18 1.389(4) . ?

C5 C10 1.398(4) . ?

C22 C21 1.499(4) . ?

C19 C18 1.388(4) . ?

C9 C10 1.382(4) . ?

Zn2 N11 2.070(2) . ?

Zn2 O2 2.074(2) . ?

Zn2 N9 2.126(2) . ?

Zn2 N13 2.238(3) . ?

Zn2 S2 2.3237(7) . ?

Zn3 N18 2.070(2) . ?

Zn3 O3 2.078(2) . ?

Zn3 N16 2.106(2) . ?

Zn3 N20 2.257(3) . ?

Zn3 S3 2.3388(7) . ?

Zn4 N25 2.074(3) . ?

Zn4 O4 2.079(2) . ?

Zn4 N23 2.118(2) . ?

Zn4 N27 2.240(3) . ?

Zn4 S4 2.3406(7) . ?

S4 C136 1.731(3) . ?

S3 C101 1.729(3) . ?

S2 C66 1.720(3) . ?

O2 N14 1.330(3) . ?

O3 N21 1.329(3) . ?

N13 C59 1.331(4) . ?

N13 N12 1.374(3) . ?

O4 N28 1.331(3) . ?

N16 C74 1.351(3) . ?

N16 N15 1.379(3) . ?

N9 C39 1.351(3) . ?

N9 N8 1.372(3) . ?

N20 C94 1.338(4) . ?

N20 N19 1.375(3) . ?

N11 C49 1.342(4) . ?

N11 N10 1.373(3) . ?

N18 C84 1.346(4) . ?

N18 N17 1.374(3) . ?

N8 C37 1.358(3) . ?

N8 B2 1.545(4) . ?

N27 C129 1.347(4) . ?

N27 N26 1.378(3) . ?

N23 C109 1.346(3) . ?

N23 N22 1.376(3) . ?

N12 C57 1.355(4) . ?

N12 B2 1.543(4) . ?

N14 C70 1.357(4) . ?

N14 C66 1.371(4) . ?

N10 C47 1.362(4) . ?

N10 B2 1.540(4) . ?

N15 C72 1.357(3) . ?

N15 B3 1.539(4) . ?

N17 C82 1.358(4) . ?

N17 B3 1.542(5) . ?

N21 C105 1.355(4) . ?

N21 C101 1.373(4) . ?

N19 C92 1.349(4) . ?

N19 B3 1.542(4) . ?

N28 C140 1.362(4) . ?

N28 C136 1.373(4) . ?

N24 C117 1.358(4) . ?

N24 N25 1.380(4) . ?

N24 B4 1.544(5) . ?

N26 C127 1.364(4) . ?

N26 B4 1.531(4) . ?

N22 C107 1.348(3) . ?

N22 B4 1.549(4) . ?

N25 C119 1.340(4) . ?

C57 C58 1.379(4) . ?

C57 C56 1.492(4) . ?

C92 C93 1.386(4) . ?

C92 C91 1.495(4) . ?

C39 C38 1.402(4) . ?

C39 C40 1.473(4) . ?

C48 C47 1.369(5) . ?

C48 C49 1.408(4) . ?

C100 C99 1.387(4) . ?

C100 C95 1.403(4) . ?

C95 C96 1.386(4) . ?

C95 C94 1.475(4) . ?

C93 C94 1.398(4) . ?

C47 C46 1.490(4) . ?

C98 C97 1.391(5) . ?

C98 C99 1.393(5) . ?

C75 C76 1.397(4) . ?

C75 C80 1.407(4) . ?

C75 C74 1.463(4) . ?

C97 C96 1.386(4) . ?

C83 C82 1.370(5) . ?

C83 C84 1.407(4) . ?

C82 C81 1.499(4) . ?

C50 C55 1.393(4) . ?

C50 C51 1.398(5) . ?

C50 C49 1.478(4) . ?

C59 C58 1.404(4) . ?

C59 C60 1.479(4) . ?

C60 C61 1.395(4) . ?

C60 C65 1.398(5) . ?

C66 C67 1.402(3) . ?

C127 C128 1.378(4) . ?

C127 C126 1.494(4) . ?

C74 C73 1.400(4) . ?

C76 C77 1.385(4) . ?

C118 C117 1.379(5) . ?

C118 C119 1.396(4) . ?

C130 C135 1.398(4) . ?

C130 C131 1.398(4) . ?

C130 C129 1.473(4) . ?

C131 C132 1.391(4) . ?

C129 C128 1.402(4) . ?

C104 C105 1.372(5) . ?

C104 C103 1.391(5) . ?

C116 C117 1.492(4) . ?

C140 C139 1.365(5) . ?

C85 C90 1.390(4) . ?

C85 C86 1.397(5) . ?

C85 C84 1.477(4) . ?

C65 C64 1.385(4) . ?

C135 C134 1.388(4) . ?

C101 C102 1.398(3) . ?

C38 C37 1.364(4) . ?

C86 C87 1.391(4) . ?

C109 C108 1.407(4) . ?

C109 C110 1.467(4) . ?

C110 C111 1.388(4) . ?

C110 C115 1.395(4) . ?

C73 C72 1.364(4) . ?

C37 C36 1.495(4) . ?

C90 C89 1.387(4) . ?

C139 C138 1.385(5) . ?

C72 C71 1.509(4) . ?

C132 C133 1.381(5) . ?

C103 C102 1.378(4) . ?

C88 C89 1.385(4) . ?

C88 C87 1.394(4) . ?

C120 C121 1.393(5) . ?

C120 C125 1.394(4) . ?

C120 C119 1.484(5) . ?

C121 C122 1.385(4) . ?

C125 C124 1.384(4) . ?

C70 C69 1.369(4) . ?

C107 C108 1.377(4) . ?

C107 C106 1.502(4) . ?

C69 C68 1.389(5) . ?

C134 C133 1.396(4) . ?

C79 C80 1.375(4) . ?


C79 C78 1.389(4) . ?

C64 C63 1.390(5) . ?

C67 C68 1.373(4) . ?

C63 C62 1.383(5) . ?

C77 C78 1.387(4) . ?

C62 C61 1.389(4) . ?

C136 C137 1.402(4) . ?

C111 C112 1.390(4) . ?

C112 C113 1.386(4) . ?

C54 C53 1.392(4) . ?

C54 C55 1.399(4) . ?

C115 C114 1.382(4) . ?

C122 C123 1.382(4) . ?

C41 C40 1.400(4) . ?

C123 C124 1.384(4) . ?

C51 C52 1.387(4) . ?

C45 C40 1.402(4) . ?

C114 C113 1.381(4) . ?

C137 C138 1.386(4) . ?

C52 C53 1.383(4) . ?


loop_

  _geom_angle_atom_site_label_1

  _geom_angle_atom_site_label_2

  _geom_angle_atom_site_label_3

  _geom_angle

  _geom_angle_site_symmetry_1

  _geom_angle_site_symmetry_3

  _geom_angle_publ_flag

C45 C44 C43 120.3(3) . . ?

C41 C42 C43 120.4(3) . . ?

C44 C43 C42 119.5(3) . . ?

N4 Zn1 O1 89.24(10) . . ?

N4 Zn1 N2 95.07(9) . . ?

O1 Zn1 N2 95.81(9) . . ?

N4 Zn1 N6 83.79(10) . . ?

O1 Zn1 N6 170.56(9) . . ?

N2 Zn1 N6 91.15(9) . . ?

N4 Zn1 S1 138.37(7) . . ?

O1 Zn1 S1 84.08(6) . . ?

N2 Zn1 S1 126.44(6) . . ?


N6 Zn1 S1 96.91(6) . . ?

C31 S1 Zn1 97.05(9) . . ?

N7 O1 Zn1 116.67(19) . . ?

C24 N6 N5 106.5(2) . . ?

C24 N6 Zn1 141.2(2) . . ?

N5 N6 Zn1 110.77(19) . . ?

C2 N1 N2 109.9(2) . . ?

C2 N1 B1 128.5(2) . . ?

N2 N1 B1 121.6(2) . . ?

O1 N7 C35 117.0(3) . . ?

O1 N7 C31 121.4(3) . . ?

C35 N7 C31 121.5(3) . . ?

C22 N5 N6 109.9(2) . . ?

C22 N5 B1 128.9(3) . . ?

N6 N5 B1 121.2(3) . . ?

C14 N4 N3 106.8(2) . . ?

C14 N4 Zn1 138.2(2) . . ?

N3 N4 Zn1 113.44(19) . . ?

N2 C4 C3 109.9(2) . . ?

N2 C4 C5 124.4(2) . . ?

C3 C4 C5 125.7(3) . . ?

C20 C15 C16 118.9(3) . . ?

C20 C15 C14 122.2(3) . . ?

C16 C15 C14 119.0(3) . . ?

C30 C25 C26 119.0(3) . . ?

C30 C25 C24 121.0(3) . . ?

C26 C25 C24 120.0(3) . . ?

C26 C27 C28 120.0(3) . . ?

N7 C31 C32 116.6(2) . . ?

N7 C31 S1 120.1(2) . . ?

C32 C31 S1 123.3(2) . . ?

C4 N2 N1 106.1(2) . . ?

C4 N2 Zn1 140.69(19) . . ?

N1 N2 Zn1 113.03(17) . . ?

C12 N3 N4 109.6(3) . . ?

C12 N3 B1 129.0(3) . . ?

N4 N3 B1 121.4(2) . . ?

C27 C26 C25 120.5(3) . . ?

N7 C35 C34 121.0(3) . . ?

N6 C24 C23 110.0(3) . . ?

N6 C24 C25 124.5(3) . . ?

C23 C24 C25 125.5(3) . . ?

N1 C2 C3 107.8(3) . . ?

N1 C2 C1 123.5(3) . . ?

C3 C2 C1 128.7(3) . . ?

C28 C29 C30 120.9(3) . . ?

C12 C13 C14 106.1(3) . . ?

C33 C32 C31 122.5(3) . . ?

N3 C12 C13 107.7(3) . . ?

N3 C12 C11 122.6(3) . . ?

C13 C12 C11 129.7(3) . . ?

C7 C6 C5 121.1(3) . . ?

C29 C30 C25 120.1(3) . . ?

C22 C23 C24 105.7(3) . . ?

C19 C20 C15 120.2(3) . . ?

C29 C28 C27 119.4(3) . . ?

C7 C8 C9 119.7(3) . . ?

C32 C33 C34 118.7(3) . . ?

N4 C14 C13 109.9(3) . . ?

N4 C14 C15 123.5(3) . . ?

C13 C14 C15 126.7(3) . . ?

C16 C17 C18 119.8(3) . . ?

C17 C16 C15 121.0(3) . . ?

C6 C5 C10 117.9(3) . . ?

C6 C5 C4 123.0(2) . . ?

C10 C5 C4 119.1(2) . . ?

N5 C22 C23 107.8(3) . . ?

N5 C22 C21 122.9(3) . . ?

C23 C22 C21 129.2(3) . . ?

C35 C34 C33 119.3(3) . . ?

C2 C3 C4 106.2(2) . . ?

C20 C19 C18 120.6(3) . . ?

C19 C18 C17 119.6(3) . . ?

C10 C9 C8 120.2(3) . . ?

N5 B1 N3 110.0(3) . . ?

N5 B1 N1 109.6(3) . . ?

N3 B1 N1 109.8(3) . . ?

C8 C7 C6 120.0(3) . . ?

C9 C10 C5 121.0(3) . . ?

N11 Zn2 O2 89.73(10) . . ?

N11 Zn2 N9 94.87(9) . . ?

O2 Zn2 N9 95.66(9) . . ?

N11 Zn2 N13 83.64(10) . . ?

O2 Zn2 N13 170.75(9) . . ?

N9 Zn2 N13 91.33(9) . . ?

N11 Zn2 S2 138.69(7) . . ?

O2 Zn2 S2 84.10(6) . . ?

N9 Zn2 S2 126.34(7) . . ?

N13 Zn2 S2 96.63(6) . . ?

N18 Zn3 O3 90.33(10) . . ?

N18 Zn3 N16 95.61(9) . . ?

O3 Zn3 N16 89.30(9) . . ?

N18 Zn3 N20 86.66(10) . . ?

O3 Zn3 N20 174.94(8) . . ?

N16 Zn3 N20 86.95(9) . . ?

N18 Zn3 S3 131.83(7) . . ?

O3 Zn3 S3 83.20(6) . . ?

N16 Zn3 S3 131.77(7) . . ?

N20 Zn3 S3 101.84(6) . . ?

N25 Zn4 O4 90.78(10) . . ?

N25 Zn4 N23 95.53(9) . . ?

O4 Zn4 N23 88.72(9) . . ?

N25 Zn4 N27 86.37(10) . . ?

O4 Zn4 N27 174.85(8) . . ?

N23 Zn4 N27 87.29(9) . . ?

N25 Zn4 S4 131.62(7) . . ?

O4 Zn4 S4 83.27(6) . . ?

N23 Zn4 S4 132.05(7) . . ?

N27 Zn4 S4 101.82(6) . . ?

C136 S4 Zn4 97.12(9) . . ?

C101 S3 Zn3 97.24(9) . . ?

C66 S2 Zn2 97.02(9) . . ?

N14 O2 Zn2 116.55(19) . . ?

N21 O3 Zn3 117.22(19) . . ?

C59 N13 N12 106.0(2) . . ?

C59 N13 Zn2 140.5(2) . . ?

N12 N13 Zn2 110.62(18) . . ?

N28 O4 Zn4 117.08(19) . . ?

C74 N16 N15 106.4(2) . . ?

C74 N16 Zn3 138.9(2) . . ?

N15 N16 Zn3 113.77(17) . . ?

C39 N9 N8 106.4(2) . . ?

C39 N9 Zn2 140.18(19) . . ?

N8 N9 Zn2 113.13(16) . . ?

C94 N20 N19 106.0(2) . . ?

C94 N20 Zn3 141.4(2) . . ?

N19 N20 Zn3 111.24(18) . . ?

C49 N11 N10 106.8(2) . . ?

C49 N11 Zn2 137.3(2) . . ?

N10 N11 Zn2 113.70(19) . . ?

C84 N18 N17 106.6(2) . . ?

C84 N18 Zn3 137.7(2) . . ?

N17 N18 Zn3 113.75(19) . . ?

C37 N8 N9 109.9(2) . . ?

C37 N8 B2 129.0(2) . . ?

N9 N8 B2 121.0(2) . . ?

C129 N27 N26 105.9(3) . . ?

C129 N27 Zn4 140.3(2) . . ?

N26 N27 Zn4 110.91(19) . . ?

C109 N23 N22 106.8(2) . . ?

C109 N23 Zn4 138.13(19) . . ?

N22 N23 Zn4 114.01(17) . . ?

C57 N12 N13 110.5(2) . . ?

C57 N12 B2 128.7(2) . . ?

N13 N12 B2 120.6(2) . . ?

O2 N14 C70 117.0(3) . . ?

O2 N14 C66 121.6(3) . . ?

C70 N14 C66 121.4(3) . . ?

C47 N10 N11 109.9(3) . . ?

C47 N10 B2 128.9(3) . . ?

N11 N10 B2 121.0(2) . . ?

C72 N15 N16 109.8(2) . . ?

C72 N15 B3 129.4(2) . . ?

N16 N15 B3 120.8(2) . . ?

C82 N17 N18 110.1(3) . . ?

C82 N17 B3 128.1(3) . . ?

N18 N17 B3 121.7(2) . . ?

O3 N21 C105 117.2(3) . . ?

O3 N21 C101 121.2(3) . . ?

C105 N21 C101 121.6(3) . . ?

C92 N19 N20 110.8(2) . . ?

C92 N19 B3 127.8(3) . . ?

N20 N19 B3 120.8(3) . . ?

O4 N28 C140 117.0(3) . . ?

O4 N28 C136 121.2(3) . . ?

C140 N28 C136 121.7(3) . . ?

C117 N24 N25 109.8(3) . . ?

C117 N24 B4 128.1(3) . . ?

N25 N24 B4 121.8(2) . . ?

C127 N26 N27 110.3(2) . . ?

C127 N26 B4 127.4(2) . . ?

N27 N26 B4 121.6(3) . . ?

C107 N22 N23 110.1(2) . . ?

C107 N22 B4 129.5(2) . . ?

N23 N22 B4 120.4(2) . . ?

C119 N25 N24 106.5(2) . . ?

C119 N25 Zn4 137.2(2) . . ?

N24 N25 Zn4 113.48(19) . . ?

N12 C57 C58 107.3(3) . . ?

N12 C57 C56 123.5(3) . . ?

C58 C57 C56 129.1(3) . . ?

N19 C92 C93 107.1(3) . . ?

N19 C92 C91 123.2(3) . . ?

C93 C92 C91 129.7(3) . . ?

N9 C39 C38 109.2(2) . . ?

N9 C39 C40 124.9(2) . . ?

C38 C39 C40 125.9(2) . . ?

C47 C48 C49 106.5(3) . . ?

C99 C100 C95 120.3(3) . . ?


C96 C95 C100 118.9(3) . . ?

C96 C95 C94 121.4(3) . . ?

C100 C95 C94 119.6(3) . . ?

C92 C93 C94 105.9(3) . . ?

N10 C47 C48 107.5(3) . . ?

N10 C47 C46 122.5(3) . . ?

C48 C47 C46 129.9(3) . . ?

C97 C98 C99 119.6(3) . . ?

C76 C75 C80 117.8(3) . . ?

C76 C75 C74 124.1(3) . . ?

C80 C75 C74 118.1(3) . . ?

C96 C97 C98 120.1(3) . . ?

C82 C83 C84 106.6(3) . . ?

N17 C82 C83 107.5(3) . . ?

N17 C82 C81 123.1(3) . . ?

C83 C82 C81 129.4(3) . . ?

N20 C94 C93 110.2(3) . . ?

N20 C94 C95 124.0(3) . . ?

C93 C94 C95 125.7(3) . . ?

C97 C96 C95 120.8(3) . . ?

C55 C50 C51 119.2(3) . . ?

C55 C50 C49 121.7(3) . . ?

C51 C50 C49 119.0(3) . . ?

N13 C59 C58 110.5(3) . . ?

N13 C59 C60 124.6(3) . . ?

C58 C59 C60 124.9(3) . . ?

C61 C60 C65 118.9(3) . . ?

C61 C60 C59 121.1(3) . . ?

C65 C60 C59 119.8(3) . . ?

N14 C66 C67 116.8(2) . . ?

N14 C66 S2 120.0(2) . . ?

C67 C66 S2 123.2(2) . . ?

C57 C58 C59 105.6(3) . . ?

N26 C127 C128 107.5(3) . . ?

N26 C127 C126 123.0(3) . . ?

C128 C127 C126 129.4(3) . . ?

C100 C99 C98 120.1(3) . . ?

N11 C49 C48 109.2(3) . . ?

N11 C49 C50 123.4(3) . . ?

C48 C49 C50 127.4(3) . . ?

N16 C74 C73 109.0(2) . . ?

N16 C74 C75 124.1(2) . . ?

C73 C74 C75 126.9(3) . . ?

C77 C76 C75 120.8(3) . . ?

C117 C118 C119 106.2(3) . . ?

C135 C130 C131 119.1(3) . . ?

C135 C130 C129 119.2(3) . . ?

C131 C130 C129 121.6(3) . . ?

C132 C131 C130 120.2(3) . . ?

N27 C129 C128 110.3(3) . . ?

N27 C129 C130 124.0(3) . . ?

C128 C129 C130 125.6(3) . . ?

C105 C104 C103 118.3(3) . . ?

N28 C140 C139 121.1(3) . . ?

N24 C117 C118 107.6(3) . . ?

N24 C117 C116 123.3(3) . . ?

C118 C117 C116 129.1(3) . . ?

C90 C85 C86 118.5(3) . . ?

C90 C85 C84 123.4(3) . . ?

C86 C85 C84 118.1(3) . . ?

C127 C128 C129 105.9(3) . . ?

C64 C65 C60 120.6(3) . . ?

C134 C135 C130 120.7(3) . . ?

N21 C101 C102 117.2(2) . . ?

N21 C101 S3 119.6(2) . . ?

C102 C101 S3 123.1(2) . . ?

C37 C38 C39 106.5(2) . . ?

C87 C86 C85 120.9(3) . . ?

N23 C109 C108 108.9(2) . . ?

N23 C109 C110 125.2(2) . . ?

C108 C109 C110 125.9(3) . . ?

C111 C110 C115 118.4(3) . . ?

C111 C110 C109 123.2(3) . . ?

C115 C110 C109 118.4(3) . . ?

C72 C73 C74 107.0(3) . . ?

N8 C37 C38 107.9(2) . . ?

N8 C37 C36 122.9(3) . . ?

C38 C37 C36 129.2(3) . . ?

C89 C90 C85 120.9(3) . . ?

C140 C139 C138 119.5(3) . . ?

N15 C72 C73 107.8(3) . . ?

N15 C72 C71 122.7(3) . . ?

C73 C72 C71 129.5(3) . . ?

N21 C105 C104 121.8(3) . . ?

N18 C84 C83 109.2(3) . . ?

N18 C84 C85 124.5(3) . . ?

C83 C84 C85 126.3(3) . . ?

C133 C132 C131 120.1(3) . . ?

C102 C103 C104 119.6(3) . . ?

C89 C88 C87 119.8(3) . . ?

C121 C120 C125 118.7(3) . . ?

C121 C120 C119 118.6(3) . . ?

C125 C120 C119 122.7(3) . . ?

C122 C121 C120 120.7(3) . . ?

C124 C125 C120 120.0(3) . . ?

N14 C70 C69 121.6(3) . . ?

N22 C107 C108 107.7(3) . . ?

N22 C107 C106 123.4(3) . . ?

C108 C107 C106 128.9(3) . . ?

C70 C69 C68 119.0(3) . . ?

C135 C134 C133 119.4(3) . . ?

C80 C79 C78 120.1(3) . . ?

C88 C89 C90 120.2(3) . . ?

C65 C64 C63 120.0(3) . . ?

C68 C67 C66 122.2(3) . . ?

C86 C87 C88 119.6(3) . . ?

C103 C102 C101 121.5(3) . . ?

C62 C63 C64 119.8(3) . . ?

C76 C77 C78 120.4(3) . . ?

C63 C62 C61 120.4(3) . . ?

N15 B3 N19 109.1(3) . . ?

N15 B3 N17 109.9(3) . . ?

N19 B3 N17 110.7(2) . . ?

C62 C61 C60 120.3(3) . . ?

C67 C68 C69 118.8(3) . . ?

C77 C78 C79 119.6(3) . . ?

N28 C136 C137 117.2(2) . . ?

N28 C136 S4 119.6(2) . . ?

C137 C136 S4 123.1(2) . . ?

C110 C111 C112 120.4(3) . . ?

C113 C112 C111 120.3(3) . . ?

C53 C54 C55 120.6(3) . . ?

N25 C119 C118 110.0(3) . . ?

N25 C119 C120 124.0(3) . . ?

C118 C119 C120 126.0(3) . . ?

N10 B2 N12 110.9(2) . . ?

N10 B2 N8 109.9(3) . . ?

N12 B2 N8 109.2(2) . . ?

C50 C55 C54 119.8(3) . . ?

C114 C115 C110 121.3(3) . . ?

C79 C80 C75 121.3(3) . . ?

C132 C133 C134 120.4(3) . . ?

C123 C122 C121 120.5(3) . . ?

C42 C41 C40 120.6(3) . . ?

C107 C108 C109 106.4(2) . . ?

C122 C123 C124 118.9(3) . . ?

C125 C124 C123 121.2(3) . . ?

C52 C51 C50 120.5(3) . . ?

C44 C45 C40 121.1(3) . . ?

C113 C114 C115 119.7(3) . . ?

C41 C40 C45 118.0(3) . . ?

C41 C40 C39 122.9(2) . . ?

C45 C40 C39 119.1(2) . . ?

C138 C137 C136 121.4(3) . . ?

C139 C138 C137 119.0(3) . . ?

C53 C52 C51 120.4(3) . . ?

N26 B4 N24 111.4(2) . . ?

N26 B4 N22 108.2(3) . . ?

N24 B4 N22 109.4(3) . . ?

C52 C53 C54 119.4(3) . . ?

C114 C113 C112 119.8(3) . . ?


_diffrn_measured_fraction_theta_max    0.993

_diffrn_reflns_theta_full              27.51

_diffrn_measured_fraction_theta_full   0.993

_refine_diff_density_max    0.648

_refine_diff_density_min   -0.289

_refine_diff_density_rms    0.078

#===END
